# Supplementary material for: A Stable-Isotope Mass Spectrometry-Based Metabolic Footprinting Approach to Analyze Exudates from Phytoplankton
Source: PubMed Central journal article supplement (PMC3853721; doi:10.3390/md11114158), 2013-10-29

## Supplementary Materials

**Figure S1.** PCA scores plot from analysis of mass spectra (70–590  $m/z$ ) from negative ion FT-ICR metabolic footprinting analyses of (●) unlabelled and  $^{13}\text{C}$ -labelled (●) seawater without algal cells (as controls,  $n = 6$  each), and (■) unlabelled and (■)  $^{13}\text{C}$ -labelled cultures of *Alexandrium tamarens* ( $n = 6$  each). Black triangles represent QC samples. The major separation along the PC1 axis corresponds to the differences between the metabolic footprints of seawater samples with vs. without algal cells present. Separation along PC2 corresponds to differences between the metabolic footprints of  $^{13}\text{C}$ -labelled vs. unlabelled *A. tamarens* cultures.

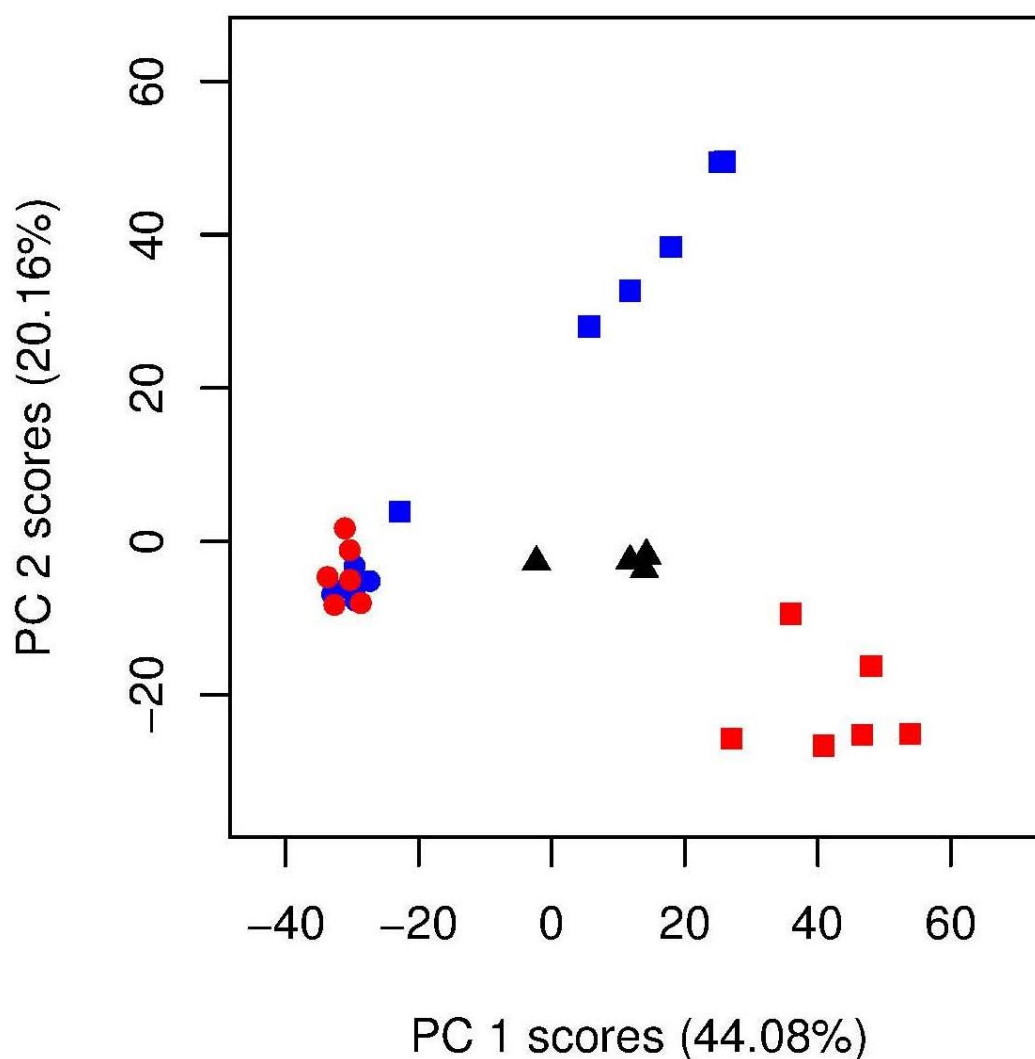

**Figure S2.** Stable isotope patterns observed in mass spectra collected from  $^{13}\text{C}$ -labeled cultures of *Alexandrium tamarense*. Signal intensity template presented in green, additional  $^{13}\text{C}$  labeled peaks in black and isotopic peaks observed in mass spectra of non-labeled *Alexandrium tamarense* samples in red. Despite the high sensitivity and mass accuracy of FT-ICR MS, a relatively high number of non-ideal SIPs were found (**a–d**); these arose because the signal intensity of partially or fully-labelled compound dropped below the detection level of the FTICR MS, which resulted in missing peaks across the SIP; a single  $m/z$  peak resulted from two or more metabolites of similar mass, which resulted in an altered isotope intensity profile; some  $m/z$  features were falsely assigned to a particular SIP in part because of the finite mass accuracy of the FT-ICR; or no all- $^{12}\text{C}$  peak or  $^{12}\text{C}$ – $^{13}\text{C}$  isotope peak pair could be located.

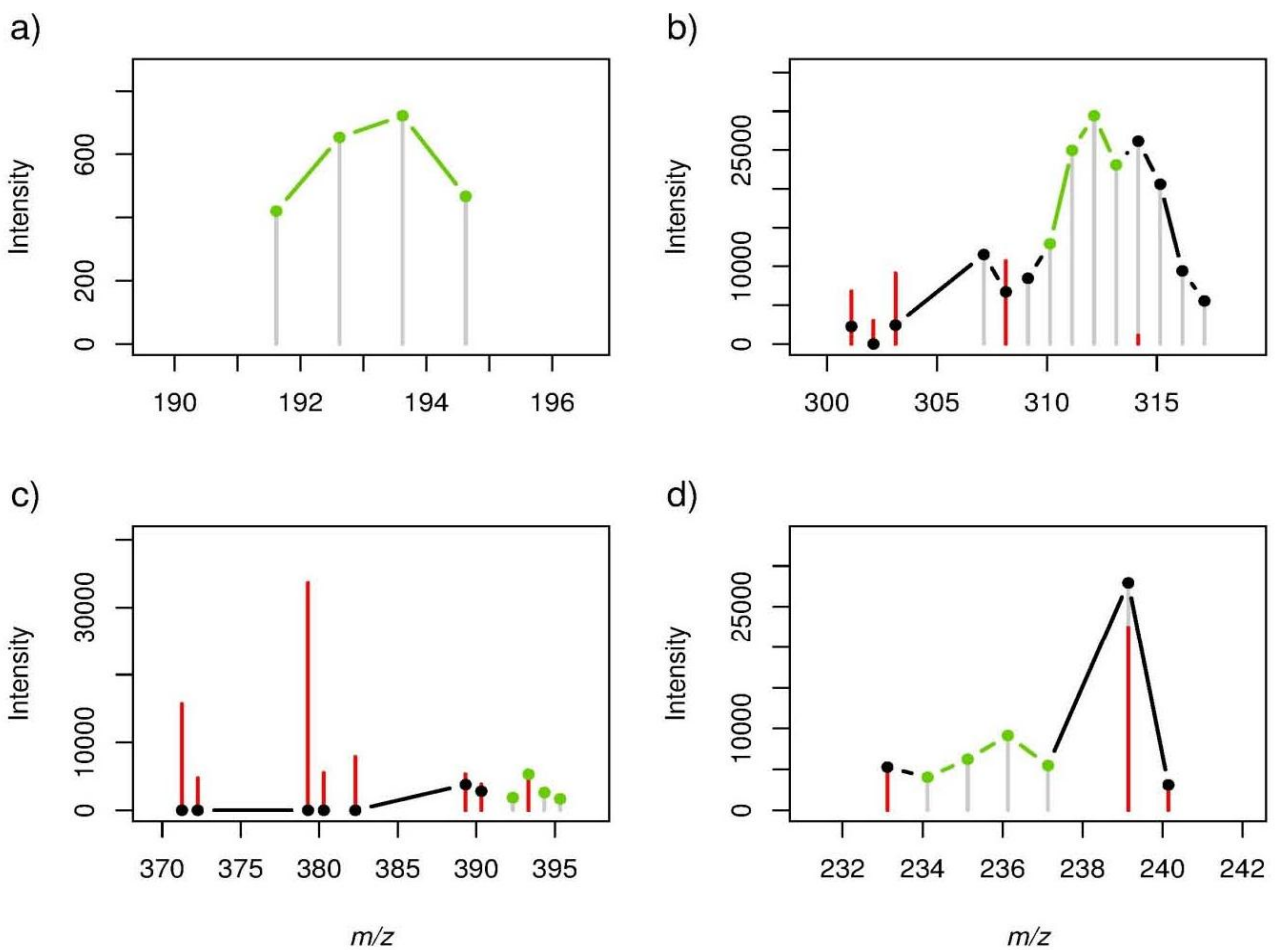

**Figure S3.** Stable isotope patterns modeled with six different labeling efficiencies (a) 1.1%, (b) 20%, (c) 40% (d) 60% (e) 80% and (f) 100% and four different numbers of  $^{12}\text{C}$  atoms in a particular empirical formula:  $^{12}\text{C}_5\text{H}_h\text{N}_n\text{O}_o\text{P}_p\text{S}_s$  (black),  $^{12}\text{C}_{10}\text{H}_h\text{N}_n\text{O}_o\text{P}_p\text{S}_s$  (blue),  $^{12}\text{C}_{15}\text{H}_h\text{N}_n\text{O}_o\text{P}_p\text{S}_s$  (red) and  $^{12}\text{C}_{20}\text{H}_h\text{N}_n\text{O}_o\text{P}_p\text{S}_s$  (green). As the labelling efficiency is varied the isotope intensity distribution will move, becoming left-shifted for label efficiencies less than 50% and right-shifted for label efficiencies greater than 50%.

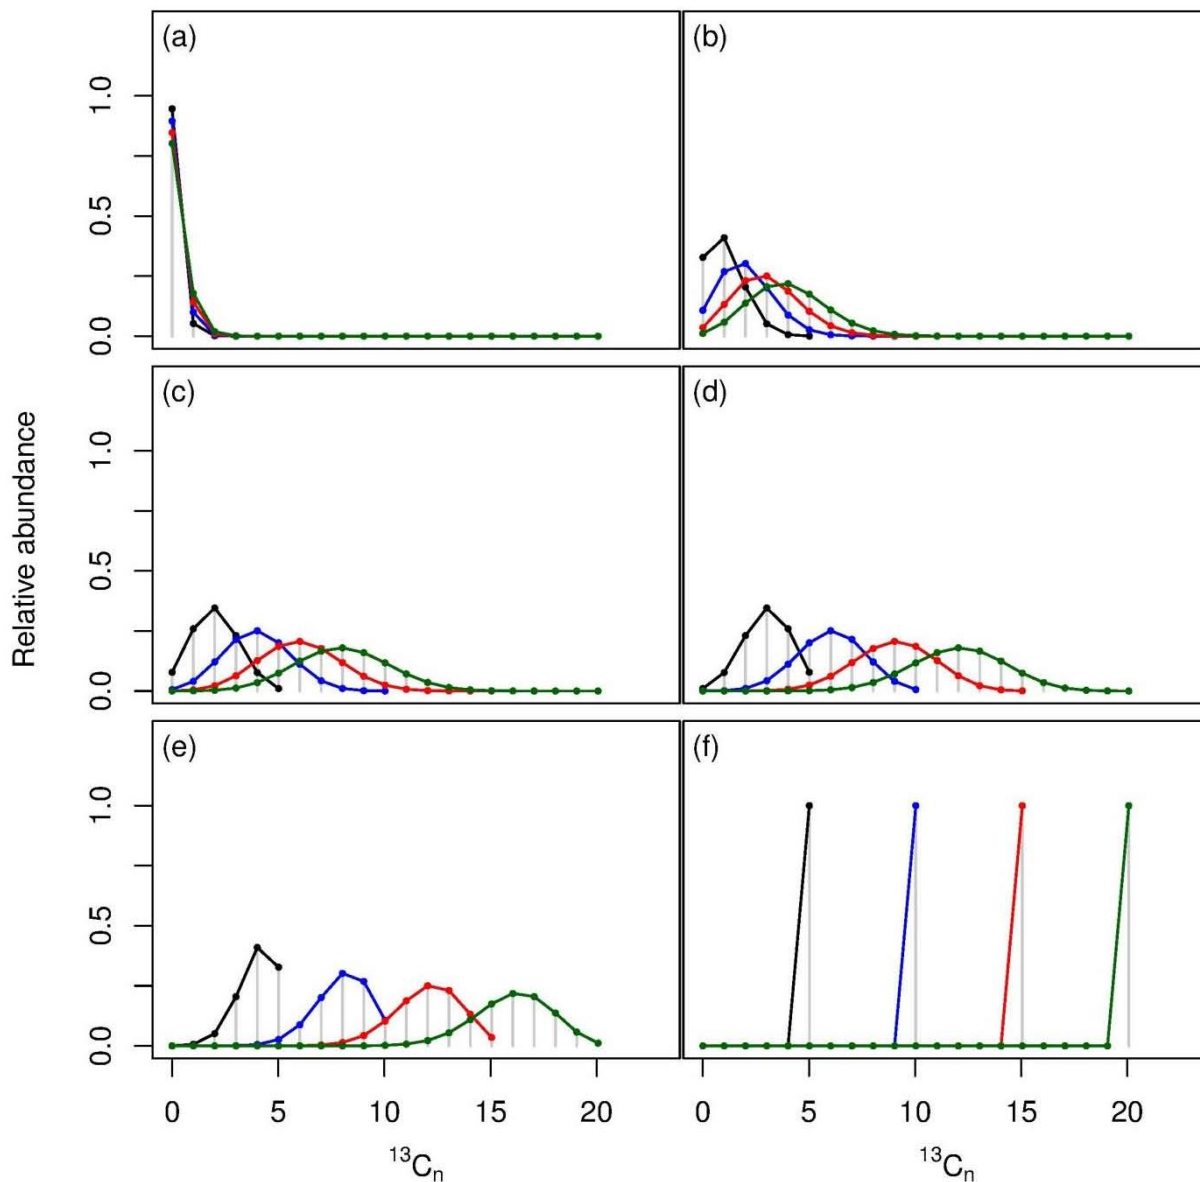

**Figure S4.** Mass spectral characterization after solid-phase-extraction of the putatively annotated (based upon accurate mass measurement) myristic acid, (a) mass spectra for unlabelled fraction FM2 (top) and  $^{13}\text{C}$ -labelled FM2 (Orbitrap Velos), showing the isotopic pattern related to the original  $m/z$  227.20143 signal. Both the monoisotopic signal and the SIP had their maximum intensities in the same FM2 fractions; (b) collision-induced fragmentation (CID) MS/MS spectra (Orbitrap, normalised collision energy of 30%) for the monoisotopic signal  $m/z$  227 from the unlabelled FM2 fraction, overlaid with CID spectra for three of the SIP signals from the labelled FM2 fraction, all four SIP signals show a similar pattern of losses, as would be expected from isotopes; (c) CID MS/MS spectra (LTQ FT Ultra, normalised collision energy of 45%) for the monoisotopic signal  $m/z$  227 from the unlabelled FM2 fraction, compared with that of an authentic myristic acid standard, while the signals in the standard constitute the main fragments in the sample, there is likely another, isomeric compound present.

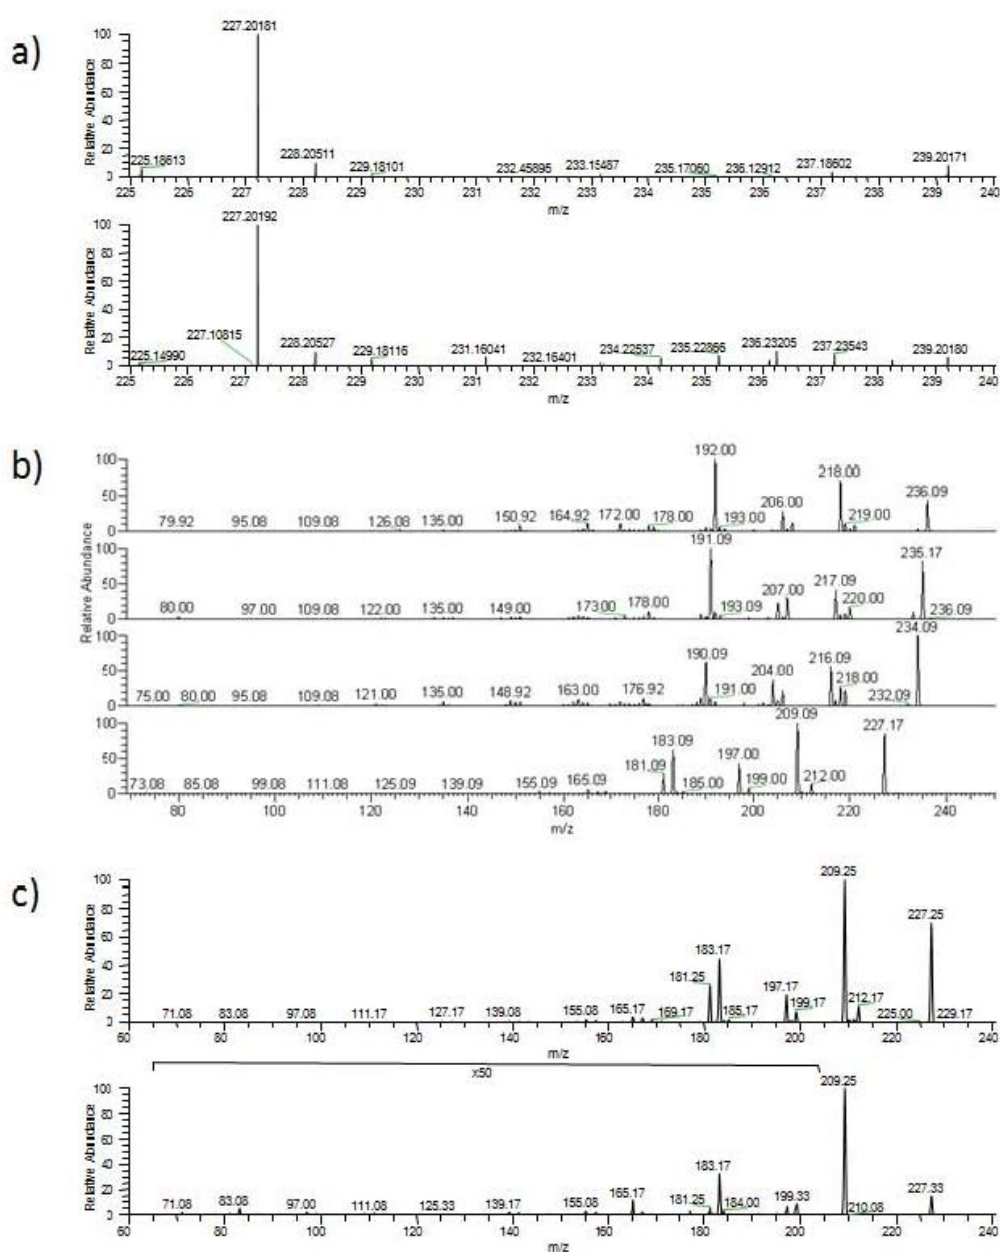



**Table S1.** Stable isotope patterns located and annotated in mass spectra collected from  $^{13}\text{C}$ -labeled cultures of *Alexandrium tamarense*.

| <i>m/z</i> | Intensity   | ID SIP<br>(Figure S5) | Empirical formula<br>(all- $^{12}\text{C}$ containing<br>peak) | Ion form                        | Mass<br>error<br>(ppm) | KEGG compound                                                                                                                                                         | <i>r</i> -value | <i>p</i> -value |
|------------|-------------|-----------------------|----------------------------------------------------------------|---------------------------------|------------------------|-----------------------------------------------------------------------------------------------------------------------------------------------------------------------|-----------------|-----------------|
| 115.04011  | 2958.4295   | 1                     | $\text{C}_3\text{H}_4\text{O}$                                 | $[\text{M} + \text{Acetate}]^-$ | 0.36                   | [2-Propyn-1-ol, Acrolein]                                                                                                                                             | 0.00            | 1.0000          |
| 115.04011  | 2958.4295   | 1                     | $\text{C}_5\text{H}_8\text{O}_3$                               | $[\text{M} - \text{H}]^-$       | 0.36                   | [2-Oxopentanoic acid, 3-Methyl-2-oxobutanoic acid,<br>3-Oxopentanoic acid, 5-Oxopentanoate]                                                                           | 0.98            | 0.0187          |
| 121.02940  | 168682.4333 | 2                     | $\text{C}_5\text{H}_2$                                         | $[\text{M} + \text{Acetate}]^-$ | -0.86                  |                                                                                                                                                                       | -0.82           | 0.3857          |
| 121.02940  | 168682.4333 | 2                     | $\text{C}_7\text{H}_6\text{O}_2$                               | $[\text{M} - \text{H}]^-$       | -0.86                  | [3-Hydroxybenzaldehyde, 4-Hydroxybenzaldehyde,<br>Benzoate, Salicylaldehyde, Tropolone]                                                                               | 0.98            | 0.0040          |
| 123.04518  | 3533.979    | 3                     | $\text{C}_5\text{H}_4$                                         | $[\text{M} + \text{Acetate}]^-$ | 0.21                   |                                                                                                                                                                       | 0.30            | 0.7038          |
| 123.04518  | 3533.979    | 3                     | $\text{C}_7\text{H}_8\text{O}_2$                               | $[\text{M} - \text{H}]^-$       | 0.21                   | [2,3-Dihydroxytoluene, 3-Hydroxybenzyl alcohol,<br>4-Methylcatechol, Orcinol, Salicyl alcohol,<br><i>o</i> -Methoxyphenol, <i>p</i> -Hydroxybenzyl alcohol]           | 0.95            | 0.0129          |
| 125.06084  | 3055.881    | 4                     | $\text{C}_5\text{H}_6$                                         | $[\text{M} + \text{Acetate}]^-$ | 0.29                   |                                                                                                                                                                       | 0.27            | 0.7321          |
| 125.06084  | 3055.881    | 4                     | $\text{C}_7\text{H}_{10}\text{O}_2$                            | $[\text{M} - \text{H}]^-$       | 0.29                   | [Cyclohex-1-enecarboxylic acid, Toluene- <i>cis</i> -dihydrodiol]                                                                                                     | 0.98            | 0.0007          |
| 125.09722  | 7374.999    | 5                     | $\text{C}_8\text{H}_{14}\text{O}$                              | $[\text{M} - \text{H}]^-$       | 0.25                   | [Sulcatone]                                                                                                                                                           | 0.99            | 0.0008          |
| 127.04010  | 5328.0675   | 6                     | $\text{C}_4\text{H}_4\text{O}$                                 | $[\text{M} + \text{Acetate}]^-$ | 0.25                   | [3-Butyn-1-ol, Furan]                                                                                                                                                 | 0.16            | 0.8967          |
| 127.04010  | 5328.0675   | 6                     | $\text{C}_6\text{H}_8\text{O}_3$                               | $[\text{M} - \text{H}]^-$       | 0.25                   | [(4 <i>E</i> )-2-Oxohexenoic acid, 2-Hydroxy- <i>cis</i> -hex-2,4-dienoate,<br>Dihydro-4,4-dimethyl-2,3-Furandione, Dihydrophloroglucinol]                            | 0.96            | 0.0107          |
| 127.07647  | 6996.667667 | 7                     | $\text{C}_5\text{H}_8$                                         | $[\text{M} + \text{Acetate}]^-$ | 0.13                   | [Isoprene]                                                                                                                                                            | 0.38            | 0.6186          |
| 127.07647  | 6996.667667 | 7                     | $\text{C}_7\text{H}_{12}\text{O}_2$                            | $[\text{M} - \text{H}]^-$       | 0.13                   | [1-Oxa-2-oxo-3-methylcycloheptane, 3-Isopropylbut-3-enoic acid,<br>Butyl acrylate, Cyclohexane-1-carboxylate,<br>Ethyl 2-methylbut-2-enoate, alpha-EMGBL, beta-EMGBL] | 0.95            | 0.0139          |
| 129.05574  | 18106.15833 | 8                     | $\text{C}_4\text{H}_6\text{O}$                                 | $[\text{M} + \text{Acetate}]^-$ | 0.17                   | [3-Butyn-1-ol, Crotonaldehyde, Vinyl ether]                                                                                                                           | 0.08            | 0.9517          |

Table S1. Cont.

| <i>m/z</i> | Intensity   | ID SIP<br>(Figure S5) | Empirical formula<br>(all- <sup>12</sup> C containing<br>peak) | Ion form                   | Mass<br>error<br>(ppm) | KEGG compound                                                                                                                                                                                                                                                                                                                                                                                                     | <i>r</i> -value | <i>p</i> -value |
|------------|-------------|-----------------------|----------------------------------------------------------------|----------------------------|------------------------|-------------------------------------------------------------------------------------------------------------------------------------------------------------------------------------------------------------------------------------------------------------------------------------------------------------------------------------------------------------------------------------------------------------------|-----------------|-----------------|
| 129.05574  | 18106.15833 | 8                     | C <sub>6</sub> H <sub>10</sub> O <sub>3</sub>                  | [M – H] <sup>–</sup>       | 0.17                   | [(3 <i>R</i> )-3-Methyl-2-oxopentanoic acid, ( <i>R</i> )-Pantolactone,<br>( <i>S</i> )-3-Methyl-2-oxopentanoic acid,<br>1-Oxa-2-oxo-3-hydroxycycloheptane,<br>2-Hydroxyethyl methacrylate, 2-Oxohexanoic acid,<br>3-Methyl-2-oxopentanoate, 3-Oxohexanoic acid,<br>4-Methyl-2-oxopentanoate, 5-Oxohexanoic acid,<br>6-Hydroxyhexan-6-olide, Adipate semialdehyde,<br>Ethyl 3-oxobutanoate, beta-Ketoisocaproate] | 0.93            | 0.0225          |
| 129.09196  | 329766.9    | 9                     | C <sub>5</sub> H <sub>10</sub>                                 | [M + Acetate] <sup>–</sup> | –1.11                  |                                                                                                                                                                                                                                                                                                                                                                                                                   | –0.80           | 0.4075          |
| 129.09196  | 329766.9    | 9                     | C <sub>7</sub> H <sub>14</sub> O <sub>2</sub>                  | [M – H] <sup>–</sup>       | –1.11                  | [Ethyl isovalerate, Heptanoic acid, Isoamyl acetate]                                                                                                                                                                                                                                                                                                                                                              | 0.81            | 0.1925          |
| 131.07140  | 7190.720167 | 10                    | C <sub>4</sub> H <sub>8</sub> O                                | [M + Acetate] <sup>–</sup> | 0.24                   | [1,2-Epoxybutane, Butanal, Methyl ethyl ketone]                                                                                                                                                                                                                                                                                                                                                                   | 0.27            | 0.8247          |
| 131.07140  | 7190.720167 | 10                    | C <sub>6</sub> H <sub>12</sub> O <sub>3</sub>                  | [M – H] <sup>–</sup>       | 0.24                   | [6-Hydroxyhexanoic acid, D-2-Hydroxyisocaproate,<br>Ethyl ( <i>R</i> )-3-hydroxybutanoate, Paraldehyde]                                                                                                                                                                                                                                                                                                           | 0.91            | 0.0297          |
| 133.06593  | 6023.855167 | 11                    | C <sub>9</sub> H <sub>10</sub> O                               | [M – H] <sup>–</sup>       | 0.31                   | [Chavicol, Cinnamyl alcohol, Indan-1-ol, Phenylacetone]                                                                                                                                                                                                                                                                                                                                                           | 0.98            | 0.0215          |
| 136.04044  | 5200.330167 | 12                    | C <sub>5</sub> H <sub>3</sub> N                                | [M + Acetate] <sup>–</sup> | 0.27                   |                                                                                                                                                                                                                                                                                                                                                                                                                   | –0.83           | 0.3712          |
| 136.04044  | 5200.330167 | 12                    | C <sub>7</sub> H <sub>7</sub> N <sub>2</sub> O <sub>2</sub>    | [M – H] <sup>–</sup>       | 0.27                   | [3-Nitrotoluene, 4-Aminobenzoate, 4-Nitrotoluene,<br>Anthranilate, N-Methylnicotinate]                                                                                                                                                                                                                                                                                                                            | 0.75            | 0.2476          |
| 135.08158  | 2867.2545   | 13                    | C <sub>9</sub> H <sub>12</sub> O                               | [M – H] <sup>–</sup>       | 0.31                   | [4-Propylphenol]                                                                                                                                                                                                                                                                                                                                                                                                  | 0.97            | 0.0071          |
| 137.06085  | 4163.286667 | 14                    | C <sub>6</sub> H <sub>6</sub>                                  | [M + Acetate] <sup>–</sup> | 0.34                   | [Benzene]                                                                                                                                                                                                                                                                                                                                                                                                         | 0.71            | 0.1797          |

Table S1. Cont.

| <i>m/z</i> | Intensity   | ID SIP<br>(Figure S5) | Empirical formula<br>(all- <sup>12</sup> C containing<br>peak) | Ion form                   | Mass<br>error<br>(ppm) | KEGG compound                                                                                                                                                                                | <i>r</i> -value | <i>p</i> -value |
|------------|-------------|-----------------------|----------------------------------------------------------------|----------------------------|------------------------|----------------------------------------------------------------------------------------------------------------------------------------------------------------------------------------------|-----------------|-----------------|
| 137.06085  | 4163.286667 | 14                    | C <sub>8</sub> H <sub>10</sub> O <sub>2</sub>                  | [M – H] <sup>–</sup>       | 0.34                   | [1-(4-Hydroxyphenyl)ethanol, 2-Methyl-6-oxohepta-2,4-dienal,<br>3-Ethylcatechol, 3-Methoxybenzyl alcohol, 4-Hydroxyphenylethanol,<br>Styrene <i>cis</i> -glycol]                             | 0.88            | 0.0215          |
| 137.09722  | 2682.751667 | 15                    | C <sub>9</sub> H <sub>14</sub> O                               | [M – H] <sup>–</sup>       | 0.23                   | [3,6-Nonadienal, Isophorone, Nona-2,6-dienal]                                                                                                                                                | 0.90            | 0.0363          |
| 139.07650  | 5189.27     | 16                    | C <sub>6</sub> H <sub>8</sub>                                  | [M + Acetate] <sup>–</sup> | 0.33                   |                                                                                                                                                                                              | 0.72            | 0.1739          |
| 139.07650  | 5189.27     | 16                    | C <sub>8</sub> H <sub>12</sub> O <sub>2</sub>                  | [M – H] <sup>–</sup>       | 0.33                   | [2-Propyl-2,4-pentadienoic acid, 4-Vinylcyclohexene diepoxide,<br>7-Hydroxy-6-methylhepta-3,5-dienal,<br><i>cis</i> -1,2-Dihydro-3-ethylcatechol]                                            | 0.86            | 0.0262          |
| 141.05562  | 6652.611333 | 17                    | C <sub>5</sub> H <sub>6</sub> O                                | [M + Acetate] <sup>–</sup> | –0.7                   |                                                                                                                                                                                              | 0.93            | 0.0731          |
| 141.05562  | 6652.611333 | 17                    | C <sub>7</sub> H <sub>10</sub> O <sub>3</sub>                  | [M – H] <sup>–</sup>       | –0.7                   | [4-Oxocyclohexanecarboxylate]                                                                                                                                                                | 0.57            | 0.4279          |
| 141.09206  | 28963.815   | 18                    | C <sub>6</sub> H <sub>10</sub>                                 | [M + Acetate] <sup>–</sup> | –0.31                  |                                                                                                                                                                                              | 0.75            | 0.1426          |
| 141.09206  | 28963.815   | 18                    | C <sub>8</sub> H <sub>14</sub> O <sub>2</sub>                  | [M – H] <sup>–</sup>       | –0.31                  | [2- <i>n</i> -Propyl-2-pentenoic acid, 2- <i>n</i> -Propyl-3-pentenoic acid,<br>2- <i>n</i> -Propyl-4-pentenoic acid, Allyl isovalerate,<br>Cycloheptanecarboxylic acid, Cyclohexyl acetate] | 0.76            | 0.0781          |
| 144.04555  | 5955.535    | 19                    | C <sub>9</sub> H <sub>7</sub> NO                               | [M – H] <sup>–</sup>       | 0.43                   | [1(2 <i>H</i> )-Isoquinolinone, 3-Methyleneoxindole,<br>8-Hydroxyquinoline, Indole-3-carboxaldehyde,<br>Quinolin-2-ol, Quinolin-4-ol]                                                        | 0.88            | 0.0216          |
| 185.11855  | 1751.43895  | 20                    | C <sub>8</sub> H <sub>14</sub> O                               | [M + Acetate] <sup>–</sup> | 1.25                   | [Sulcatone]                                                                                                                                                                                  | –0.09           | 0.9149          |

Table S1. Cont.

| <i>m/z</i> | Intensity   | ID SIP<br>(Figure S5) | Empirical formula<br>(all- <sup>12</sup> C containing<br>peak) | Ion form                   | Mass<br>error<br>(ppm) | KEGG compound                                                                                                                                                                                                                                                                                                                                                                                                                                     | <i>r</i> -value | <i>p</i> -value |
|------------|-------------|-----------------------|----------------------------------------------------------------|----------------------------|------------------------|---------------------------------------------------------------------------------------------------------------------------------------------------------------------------------------------------------------------------------------------------------------------------------------------------------------------------------------------------------------------------------------------------------------------------------------------------|-----------------|-----------------|
| 185.11855  | 1751.43895  | 20                    | C <sub>10</sub> H <sub>18</sub> O <sub>3</sub>                 | [M – H] <sup>–</sup>       | 1.25                   | [(3 <i>R</i> )-6-Hydroxy-3-isopropenyl-heptanoate,<br>(3 <i>S</i> )-6-Hydroxy-3-isopropenyl-heptanoate,<br>(5 <i>R</i> )-6-Hydroxy-5-isopropenyl-2-methylhexanoate,<br>(5 <i>S</i> )-6-Hydroxy-5-isopropenyl-2-methylhexanoate,<br>10-Oxodecanoate, 2-Oxodecanoic acid, Epomediol]<br>[(3 <i>R</i> )-3-Methyl-2-oxopentanoic acid, ( <i>R</i> )-Pantolactone,<br>( <i>S</i> )-3-Methyl-2-oxopentanoic acid,<br>1-Oxa-2-oxo-3-hydroxycycloheptane, | 0.95            | 0.0115          |
| 189.07708  | 8847.3296   | 21                    | C <sub>6</sub> H <sub>10</sub> O <sub>3</sub>                  | [M + Acetate] <sup>–</sup> | 1.22                   | 2-Hydroxyethyl methacrylate, 2-Oxohexanoic acid,<br>3-Methyl-2-oxopentanoate, 3-Oxohexanoic acid,<br>4-Methyl-2-oxopentanoate, 5-Oxohexanoic acid,<br>6-Hydroxyhexan-6-olide, Adipate semialdehyde,<br>Ethyl 3-oxobutanoate, beta-Ketoisocaproate]                                                                                                                                                                                                | 0.74            | 0.2634          |
| 189.07708  | 8847.3296   | 21                    | C <sub>8</sub> H <sub>14</sub> O <sub>5</sub>                  | [M – H] <sup>–</sup>       | 1.22                   | [( <i>R</i> )-3-(( <i>R</i> )-3-Hydroxybutanoyloxy)butanoate]                                                                                                                                                                                                                                                                                                                                                                                     | –0.01           | 0.9887          |
| 189.07708  | 8847.3296   | 21                    | C <sub>3</sub> H <sub>11</sub> N <sub>8</sub> P                | [M – H] <sup>–</sup>       | –0.39                  |                                                                                                                                                                                                                                                                                                                                                                                                                                                   | 0.00            | 1.0000          |
| 187.13422  | 70169.226   | 22                    | C <sub>8</sub> H <sub>16</sub> O                               | [M + Acetate] <sup>–</sup> | 1.34                   | [1-Octanal, 1-Octen-3-ol, 3-Octanone, Sulcatol]                                                                                                                                                                                                                                                                                                                                                                                                   | –0.15           | 0.8148          |
| 187.13422  | 70169.226   | 22                    | C <sub>10</sub> H <sub>20</sub> O <sub>3</sub>                 | [M – H] <sup>–</sup>       | 1.34                   | [10-Hydroxydecanoic acid, 6-Hydroxy-3,7-dimethyloctanoate]                                                                                                                                                                                                                                                                                                                                                                                        | 0.98            | 0.0001          |
| 191.09272  | 7760.51095  | 23                    | C <sub>6</sub> H <sub>12</sub> O <sub>3</sub>                  | [M + Acetate] <sup>–</sup> | 1.16                   | [6-Hydroxyhexanoic acid, D-2-Hydroxyisocaproate,<br>Ethyl ( <i>R</i> )-3-hydroxybutanoate, Paraldehyde]                                                                                                                                                                                                                                                                                                                                           | 0.10            | 0.8956          |
| 191.09272  | 7760.51095  | 23                    | C <sub>8</sub> H <sub>16</sub> O <sub>5</sub>                  | [M – H] <sup>–</sup>       | 1.16                   | [D-Mycinose]                                                                                                                                                                                                                                                                                                                                                                                                                                      | 0.75            | 0.1466          |
| 191.09272  | 7760.51095  | 23                    | C <sub>3</sub> H <sub>13</sub> N <sub>8</sub> P                | [M – H] <sup>–</sup>       | –0.44                  |                                                                                                                                                                                                                                                                                                                                                                                                                                                   | 0.00            | 1.0000          |
| 197.11853  | 114412.8083 | 24                    | C <sub>9</sub> H <sub>14</sub> O                               | [M + Acetate] <sup>–</sup> | 1.07                   | [3,6-Nonadienal, Isophorone, Nona-2,6-dienal]                                                                                                                                                                                                                                                                                                                                                                                                     | 0.60            | 0.2038          |
| 197.11853  | 114412.8083 | 24                    | C <sub>11</sub> H <sub>18</sub> O <sub>3</sub>                 | [M – H] <sup>–</sup>       | 1.07                   |                                                                                                                                                                                                                                                                                                                                                                                                                                                   | 0.96            | 0.0007          |

Table S1. Cont.

| <i>m/z</i> | Intensity   | ID SIP<br>(Figure S5) | Empirical formula<br>(all- <sup>12</sup> C containing<br>peak) | Ion form                   | Mass<br>error<br>(ppm) | KEGG compound                                                                                                                                                                                                                                                                                                                                                                     | <i>r</i> -value | <i>p</i> -value |
|------------|-------------|-----------------------|----------------------------------------------------------------|----------------------------|------------------------|-----------------------------------------------------------------------------------------------------------------------------------------------------------------------------------------------------------------------------------------------------------------------------------------------------------------------------------------------------------------------------------|-----------------|-----------------|
| 199.09782  | 69691.88    | 25                    | C <sub>8</sub> H <sub>12</sub> O <sub>2</sub>                  | [M + Acetate] <sup>−</sup> | 1.19                   | [2-Propyl-2,4-pentadienoic acid,<br>4-Vinylcyclohexene diepoxide,<br>7-Hydroxy-6-methylhepta-3,5-dienal,<br><i>cis</i> -1,2-Dihydro-3-ethylcatechol]                                                                                                                                                                                                                              | 0.67            | 0.2200          |
| 199.09782  | 69691.88    | 25                    | C <sub>10</sub> H <sub>16</sub> O <sub>4</sub>                 | [M − H] <sup>−</sup>       | 1.19                   |                                                                                                                                                                                                                                                                                                                                                                                   | 0.88            | 0.0212          |
| 197.15491  | 223653.7283 | 26                    | C <sub>10</sub> H <sub>18</sub>                                | [M + Acetate] <sup>−</sup> | 1.05                   |                                                                                                                                                                                                                                                                                                                                                                                   | 0.58            | 0.1735          |
| 197.15491  | 223653.7283 | 26                    | C <sub>12</sub> H <sub>22</sub> O <sub>2</sub>                 | [M − H] <sup>−</sup>       | 1.05                   | [(-)-Menthyl acetate, Citronellyl acetate,<br>Decanoyl acetaldehyde, Neomenthyl acetate]                                                                                                                                                                                                                                                                                          | 1.00            | 0.0000          |
| 199.13419  | 149139.7433 | 27                    | C <sub>9</sub> H <sub>16</sub> O                               | [M + Acetate] <sup>−</sup> | 1.11                   |                                                                                                                                                                                                                                                                                                                                                                                   | 0.47            | 0.3456          |
| 199.13419  | 149139.7433 | 27                    | C <sub>11</sub> H <sub>20</sub> O <sub>3</sub>                 | [M − H] <sup>−</sup>       | 1.11                   |                                                                                                                                                                                                                                                                                                                                                                                   | 0.99            | 0.0000          |
| 201.11338  | 506046.7367 | 28                    | C <sub>8</sub> H <sub>14</sub> O <sub>2</sub>                  | [M + Acetate] <sup>−</sup> | 0.73                   | [2- <i>n</i> -Propyl-2-pentenoic acid,<br>2- <i>n</i> -Propyl-3-pentenoic acid,<br>2- <i>n</i> -Propyl-4-pentenoic acid, Allyl isovalerate,<br>Cycloheptanecarboxylic acid, Cyclohexyl acetate]                                                                                                                                                                                   | 0.72            | 0.1699          |
| 201.11338  | 506046.7367 | 28                    | C <sub>10</sub> H <sub>18</sub> O <sub>4</sub>                 | [M − H] <sup>−</sup>       | 0.73                   | [Diethyl adipate, Dimethyl suberate, Sebacic acid]                                                                                                                                                                                                                                                                                                                                | 0.72            | 0.1668          |
| 199.17039  | 4947357.983 | 29                    | C <sub>10</sub> H <sub>20</sub>                                | [M + Acetate] <sup>−</sup> | 0.18                   |                                                                                                                                                                                                                                                                                                                                                                                   | 0.75            | 0.1478          |
| 199.17039  | 4947357.983 | 29                    | C <sub>12</sub> H <sub>24</sub> O <sub>2</sub>                 | [M − H] <sup>−</sup>       | 0.18                   | [Dodecanoic acid]                                                                                                                                                                                                                                                                                                                                                                 | 0.96            | 0.0085          |
| 227.20143  | 1634653.517 | 30                    | C <sub>12</sub> H <sub>24</sub>                                | [M + Acetate] <sup>−</sup> | −0.98                  |                                                                                                                                                                                                                                                                                                                                                                                   | 0.54            | 0.1365          |
| 227.20143  | 1634653.517 | 30                    | C <sub>14</sub> H <sub>28</sub> O <sub>2</sub>                 | [M − H] <sup>−</sup>       | −0.98                  | [Tetradecanoic acid]                                                                                                                                                                                                                                                                                                                                                              | 0.98            | 0.0000          |
| 229.14431  | 40693.77    | 31                    | C <sub>10</sub> H <sub>18</sub> O <sub>2</sub>                 | [M + Acetate] <sup>−</sup> | −0.98                  | [(+)-Neomatatabiol, (1 <i>R</i> ,2 <i>R</i> ,4 <i>S</i> )-Limonene-1,2-diol,<br>(4 <i>R</i> ,7 <i>S</i> )-7-Isopropyl-4-methyloxepan-2-one,<br>( <i>E</i> )-3,7-Dimethylocta-1,6-diene-3,8-diol, 10-Hydroxygeraniol,<br>6-endo-Hydroxycineole, 7-Isopropyl-4-methyloxepan-2-one,<br>8-Methyl-6-nonenoic acid, Citronellate,<br>Limonene-1,2-diol, <i>p</i> -Menth-8-ene-1,2-diol] | 0.55            | 0.3337          |

Table S1. Cont.

| <i>m/z</i> | Intensity   | ID SIP<br>(Figure S5) | Empirical formula<br>(all- <sup>12</sup> C containing<br>peak) | Ion form                   | Mass<br>error<br>(ppm) | KEGG compound                                                                                                          | <i>r</i> -value | <i>p</i> -value |
|------------|-------------|-----------------------|----------------------------------------------------------------|----------------------------|------------------------|------------------------------------------------------------------------------------------------------------------------|-----------------|-----------------|
| 229.14431  | 40693.77    | 31                    | C <sub>12</sub> H <sub>22</sub> O <sub>4</sub>                 | [M – H] <sup>–</sup>       | –0.98                  | [Dibutyl succinate, Diisopropyl adipate,<br>Dodecanedioic acid]                                                        | 0.95            | 0.0141          |
| 231.15994  | 36684.80333 | 32                    | C <sub>10</sub> H <sub>20</sub> O <sub>2</sub>                 | [M + Acetate] <sup>–</sup> | –1.05                  | [Decanoic acid, Ethyl octanoate,<br>Isoamyl isovalerate, <i>p</i> -Menthane-3,8-diol]                                  | 0.60            | 0.4048          |
| 231.15994  | 36684.80333 | 32                    | C <sub>12</sub> H <sub>24</sub> O <sub>4</sub>                 | [M – H] <sup>–</sup>       | –1.05                  |                                                                                                                        | 0.78            | 0.2196          |
| 239.12856  | 669303      | 33                    | C <sub>11</sub> H <sub>16</sub> O <sub>2</sub>                 | [M + Acetate] <sup>–</sup> | –1.35                  | [3- <i>tert</i> -Butyl-5-methylcatechol]                                                                               | 0.89            | 0.0071          |
| 239.12856  | 669303      | 33                    | C <sub>13</sub> H <sub>20</sub> O <sub>4</sub>                 | [M – H] <sup>–</sup>       | –1.35                  |                                                                                                                        | 0.89            | 0.0027          |
| 235.13374  | 70891.09    | 34                    | C <sub>12</sub> H <sub>16</sub> O                              | [M + Acetate] <sup>–</sup> | –0.97                  |                                                                                                                        | 0.75            | 0.0516          |
| 235.13374  | 70891.09    | 34                    | C <sub>14</sub> H <sub>20</sub> O <sub>3</sub>                 | [M – H] <sup>–</sup>       | –0.97                  | [4-Heptyloxybenzoic acid, Heptyl <i>p</i> -hydroxybenzoate]                                                            | 0.93            | 0.0021          |
| 237.18575  | 201365.8677 | 35                    | C <sub>13</sub> H <sub>22</sub>                                | [M + Acetate] <sup>–</sup> | –1.07                  |                                                                                                                        | 0.34            | 0.5042          |
| 237.18575  | 201365.8677 | 35                    | C <sub>15</sub> H <sub>26</sub> O <sub>2</sub>                 | [M – H] <sup>–</sup>       | –1.07                  | [Bisabolol oxide A, Bisabolol oxide B,<br>Bornyl isovalerate, Centarol, Daucol,<br>Debneyol, Kanokonol, Seircardine A] | 0.94            | 0.0052          |
| 237.14936  | 87379.51167 | 36                    | C <sub>12</sub> H <sub>18</sub> O                              | [M + Acetate] <sup>–</sup> | –1.09                  | [4- <i>n</i> -Hexylphenol, Propofol]                                                                                   | 0.87            | 0.0570          |
| 237.14936  | 87379.51167 | 36                    | C <sub>14</sub> H <sub>22</sub> O <sub>3</sub>                 | [M – H] <sup>–</sup>       | –1.09                  |                                                                                                                        | 0.87            | 0.0531          |
| 239.16501  | 191326.915  | 37                    | C <sub>12</sub> H <sub>20</sub> O                              | [M + Acetate] <sup>–</sup> | –1.08                  | [( <i>Z,Z,Z</i> )-3,6,9-Dodecatrien-1-ol]                                                                              | 0.68            | 0.2038          |
| 239.16501  | 191326.915  | 37                    | C <sub>14</sub> H <sub>24</sub> O <sub>3</sub>                 | [M – H] <sup>–</sup>       | –1.08                  |                                                                                                                        | 0.98            | 0.0025          |
| 239.20140  | 479360.08   | 38                    | C <sub>13</sub> H <sub>24</sub>                                | [M + Acetate] <sup>–</sup> | –1.06                  |                                                                                                                        | 0.83            | 0.0422          |
| 239.20140  | 479360.08   | 38                    | C <sub>15</sub> H <sub>28</sub> O <sub>2</sub>                 | [M – H] <sup>–</sup>       | –1.06                  | [Cryptomeridiol]                                                                                                       | 0.92            | 0.0103          |
| 241.14428  | 145457.2133 | 39                    | C <sub>11</sub> H <sub>18</sub> O <sub>2</sub>                 | [M + Acetate] <sup>–</sup> | –1.05                  | [Decahydro-2-naphthoic acid, Geranyl formate]                                                                          | 0.87            | 0.0558          |
| 241.14428  | 145457.2133 | 39                    | C <sub>13</sub> H <sub>22</sub> O <sub>4</sub>                 | [M – H] <sup>–</sup>       | –1.05                  |                                                                                                                        | 0.66            | 0.2250          |
| 243.19631  | 194249.7617 | 40                    | C <sub>12</sub> H <sub>24</sub> O                              | [M + Acetate] <sup>–</sup> | –1.06                  | [Dodecylaldehyde]                                                                                                      | 0.48            | 0.5153          |
| 243.19631  | 194249.7617 | 40                    | C <sub>14</sub> H <sub>28</sub> O <sub>3</sub>                 | [M – H] <sup>–</sup>       | –1.06                  | [2 <i>S</i> -Hydroxytetradecanoic acid]                                                                                | 0.83            | 0.1742          |
| 243.13889  | 64398.36167 | 41                    | C <sub>14</sub> H <sub>16</sub>                                | [M + Acetate] <sup>–</sup> | –0.67                  | [Chamazulene]                                                                                                          | 0.79            | 0.0601          |
| 243.13889  | 64398.36167 | 41                    | C <sub>16</sub> H <sub>20</sub> O <sub>2</sub>                 | [M – H] <sup>–</sup>       | –0.67                  | [Arnebinol, Geranylbenzoquinone]                                                                                       | 0.58            | 0.2246          |

Table S1. Cont.

| <i>m/z</i> | Intensity   | ID SIP<br>(Figure S5) | Empirical formula<br>(all- <sup>12</sup> C containing<br>peak)  | Ion form                   | Mass<br>error<br>(ppm) | KEGG compound                                                                    | <i>r</i> -value | <i>p</i> -value |
|------------|-------------|-----------------------|-----------------------------------------------------------------|----------------------------|------------------------|----------------------------------------------------------------------------------|-----------------|-----------------|
| 253.21701  | 472387.4833 | 42                    | C <sub>14</sub> H <sub>26</sub>                                 | [M + Acetate] <sup>−</sup> | −1.16                  |                                                                                  | 0.94            | 0.0049          |
| 253.21701  | 472387.4833 | 42                    | C <sub>16</sub> H <sub>30</sub> O <sub>2</sub>                  | [M − H] <sup>−</sup>       | −1.16                  | [(9Z)-Hexadecenoic acid]                                                         | 0.70            | 0.1189          |
| 255.23266  | 3133035     | 43                    | C <sub>14</sub> H <sub>28</sub>                                 | [M + Acetate] <sup>−</sup> | −1.15                  |                                                                                  | 0.81            | 0.0041          |
| 255.23266  | 3133035     | 43                    | C <sub>16</sub> H <sub>32</sub> O <sub>2</sub>                  | [M − H] <sup>−</sup>       | −1.15                  | [Hexadecanoic acid]                                                              | 0.99            | 0.0000          |
| 295.26402  | 33745.72783 | 44                    | C <sub>17</sub> H <sub>32</sub>                                 | [M + Acetate] <sup>−</sup> | −0.79                  |                                                                                  | 0.59            | 0.1199          |
| 295.26402  | 33745.72783 | 44                    | C <sub>19</sub> H <sub>36</sub> O <sub>2</sub>                  | [M − H] <sup>−</sup>       | −0.79                  | [17-Methyl-6Z-octadecenoic acid,<br>Lactobacillic acid, Oleic acid methyl ester] | 0.99            | 0.0000          |
| 295.20651  | 7720.9735   | 45                    | C <sub>21</sub> H <sub>28</sub> O                               | [M − H] <sup>−</sup>       | −0.77                  |                                                                                  | 0.76            | 0.0779          |
| 301.11114  | 6797.914    | 46                    | C <sub>14</sub> H <sub>15</sub> N <sub>2</sub> P                | [M + Acetate] <sup>−</sup> | 0                      |                                                                                  | −0.46           | 0.2081          |
| 301.11114  | 6797.914    | 46                    | C <sub>4</sub> H <sub>14</sub> N <sub>6</sub> O <sub>6</sub>    | [M + Acetate] <sup>−</sup> | −0.66                  |                                                                                  | 0.00            | 1.0000          |
| 301.11114  | 6797.914    | 46                    | C <sub>12</sub> H <sub>18</sub> O <sub>3</sub> S                | [M + Acetate] <sup>−</sup> | −1.26                  |                                                                                  | −0.92           | 0.0036          |
| 301.11114  | 6797.914    | 46                    | C <sub>17</sub> H <sub>18</sub> N <sub>2</sub> O                | [M + Cl] <sup>−</sup>      | −0.58                  | [Borreline]                                                                      | 0.71            | 0.0135          |
| 301.11114  | 6797.914    | 46                    | C <sub>16</sub> H <sub>19</sub> N <sub>2</sub> O <sub>2</sub> P | [M − H] <sup>−</sup>       | 0                      |                                                                                  | 0.48            | 0.1341          |
| 301.11114  | 6797.914    | 46                    | C <sub>6</sub> H <sub>18</sub> N <sub>6</sub> O <sub>8</sub>    | [M − H] <sup>−</sup>       | −0.66                  |                                                                                  | 0.00            | 1.0000          |
| 301.11114  | 6797.914    | 46                    | C <sub>14</sub> H <sub>22</sub> O <sub>5</sub> S                | [M − H] <sup>−</sup>       | −1.26                  |                                                                                  | −0.46           | 0.2081          |
| 297.13409  | 24117.57167 | 47                    | C <sub>13</sub> H <sub>18</sub> O <sub>4</sub>                  | [M + Acetate] <sup>−</sup> | −0.92                  |                                                                                  | −0.28           | 0.7183          |
| 297.13409  | 24117.57167 | 47                    | C <sub>10</sub> H <sub>27</sub> N <sub>4</sub> PS <sub>2</sub>  | [M − H] <sup>−</sup>       | −0.38                  |                                                                                  | 0.00            | 1.0000          |
| 297.13409  | 24117.57167 | 47                    | C <sub>15</sub> H <sub>22</sub> O <sub>6</sub>                  | [M − H] <sup>−</sup>       | −0.92                  | [Sesamex]                                                                        | 0.83            | 0.0387          |
| 301.14728  | 3699.104667 | 48                    | C <sub>5</sub> H <sub>18</sub> N <sub>6</sub> O <sub>5</sub>    | [M + Acetate] <sup>−</sup> | −1.47                  |                                                                                  | 0.00            | 1.0000          |
| 301.14728  | 3699.104667 | 48                    | C <sub>10</sub> H <sub>26</sub> N <sub>4</sub> O <sub>2</sub> S | [M + Cl] <sup>−</sup>      | 0.77                   |                                                                                  | 0.92            | 0.2588          |
| 301.14728  | 3699.104667 | 48                    | C <sub>18</sub> H <sub>22</sub> N <sub>2</sub>                  | [M + Cl] <sup>−</sup>      | −1.39                  | [Cyclizine, Desipramine]                                                         | −0.69           | 0.1258          |
| 301.14728  | 3699.104667 | 48                    | C <sub>17</sub> H <sub>23</sub> N <sub>2</sub> OP               | [M − H] <sup>−</sup>       | −0.81                  |                                                                                  | −0.37           | 0.4675          |
| 301.14728  | 3699.104667 | 48                    | C <sub>7</sub> H <sub>22</sub> N <sub>6</sub> O <sub>7</sub>    | [M − H] <sup>−</sup>       | −1.47                  |                                                                                  | 0.00            | 1.0000          |
| 301.12090  | 20234.44    | 49                    | C <sub>12</sub> H <sub>19</sub> O <sub>3</sub> P                | [M + Acetate] <sup>−</sup> | −0.45                  |                                                                                  | 0.25            | 0.5862          |



Table S1. Cont.

| <i>m/z</i> | Intensity   | ID SIP<br>(Figure S5) | Empirical formula<br>(all- <sup>12</sup> C containing<br>peak) | Ion form                   | Mass<br>error<br>(ppm) | KEGG compound                                                                                                                                                                                                                                                                                                                                                                       | <i>r</i> -value | <i>p</i> -value |
|------------|-------------|-----------------------|----------------------------------------------------------------|----------------------------|------------------------|-------------------------------------------------------------------------------------------------------------------------------------------------------------------------------------------------------------------------------------------------------------------------------------------------------------------------------------------------------------------------------------|-----------------|-----------------|
| 301.12090  | 20234.44    | 49                    | C <sub>15</sub> H <sub>22</sub> O <sub>4</sub>                 | [M + Cl] <sup>−</sup>      | −1.03                  | [Mukaadial, Rugosal, Xanthoxic acid, Zinniol]                                                                                                                                                                                                                                                                                                                                       | 0.94            | 0.0015          |
| 301.12090  | 20234.44    | 49                    | C <sub>17</sub> H <sub>14</sub> N <sub>6</sub>                 | [M − H] <sup>−</sup>       | 0.61                   |                                                                                                                                                                                                                                                                                                                                                                                     | 0.51            | 0.2378          |
| 301.12090  | 20234.44    | 49                    | C <sub>14</sub> H <sub>23</sub> O <sub>5</sub> P               | [M − H] <sup>−</sup>       | −0.45                  |                                                                                                                                                                                                                                                                                                                                                                                     | 0.87            | 0.0106          |
| 301.12090  | 20234.44    | 49                    | C <sub>9</sub> H <sub>20</sub> N <sub>8</sub> P <sub>2</sub>   | [M − H] <sup>−</sup>       | −1.47                  |                                                                                                                                                                                                                                                                                                                                                                                     | −0.95           | 0.0535          |
| 303.23274  | 92459.4405  | 50                    | C <sub>18</sub> H <sub>28</sub>                                | [M + Acetate] <sup>−</sup> | −0.7                   |                                                                                                                                                                                                                                                                                                                                                                                     | 0.70            | 0.0778          |
|            |             |                       |                                                                |                            |                        | [(5Z,8Z,11Z,14Z)-Icosatetraenoic acid,<br>17-Methyl-5alpha-androst-2-ene-1alpha,17beta-diol,<br>17beta-Hydroxy-4alpha-methyl-5alpha-androstan-3-one,<br>2-Ketoepimanol,<br>3alpha-Hydroxy-2alpha-methyl-5alpha-androstan-17-one,<br>3beta-Methoxyandrost-5-en-16beta-ol,<br>Acutilol A, Dihydroabietic acid, Methandriol,<br>Metholone, Taxa-4(20),11(12)-dien-5alpha,13alpha-diol] |                 |                 |
| 303.23274  | 92459.4405  | 50                    | C <sub>20</sub> H <sub>32</sub> O <sub>2</sub>                 | [M − H] <sup>−</sup>       | −0.7                   |                                                                                                                                                                                                                                                                                                                                                                                     | 0.57            | 0.1861          |
| 307.11366  | 161073.0933 | 51                    | C <sub>6</sub> H <sub>8</sub> N <sub>12</sub>                  | [M + Acetate] <sup>−</sup> | 1.04                   |                                                                                                                                                                                                                                                                                                                                                                                     | 0.00            | 1.0000          |
| 307.11366  | 161073.0933 | 51                    | C <sub>11</sub> H <sub>21</sub> O <sub>2</sub> PS              | [M + Acetate] <sup>−</sup> | −0.6                   |                                                                                                                                                                                                                                                                                                                                                                                     | −0.58           | 0.2305          |
| 307.11366  | 161073.0933 | 51                    | C <sub>16</sub> H <sub>21</sub> N <sub>2</sub> P               | [M + Cl] <sup>−</sup>      | 0.07                   |                                                                                                                                                                                                                                                                                                                                                                                     | 0.68            | 0.0638          |
| 307.11366  | 161073.0933 | 51                    | C <sub>6</sub> H <sub>20</sub> N <sub>6</sub> O <sub>6</sub>   | [M + Cl] <sup>−</sup>      | −0.57                  |                                                                                                                                                                                                                                                                                                                                                                                     | 0.00            | 1.0000          |
| 307.11366  | 161073.0933 | 51                    | C <sub>14</sub> H <sub>24</sub> O <sub>3</sub> S               | [M + Cl] <sup>−</sup>      | −1.17                  |                                                                                                                                                                                                                                                                                                                                                                                     | 0.34            | 0.4127          |
| 307.11366  | 161073.0933 | 51                    | C <sub>8</sub> H <sub>12</sub> N <sub>12</sub> O <sub>2</sub>  | [M − H] <sup>−</sup>       | 1.04                   |                                                                                                                                                                                                                                                                                                                                                                                     | −0.67           | 0.5343          |
| 307.11366  | 161073.0933 | 51                    | C <sub>15</sub> H <sub>22</sub> N <sub>2</sub> OP <sub>2</sub> | [M − H] <sup>−</sup>       | 0.64                   |                                                                                                                                                                                                                                                                                                                                                                                     | 0.53            | 0.1723          |
| 307.11366  | 161073.0933 | 51                    | C <sub>13</sub> H <sub>25</sub> O <sub>4</sub> PS              | [M − H] <sup>−</sup>       | −0.6                   |                                                                                                                                                                                                                                                                                                                                                                                     | 0.12            | 0.7836          |
| 311.12652  | 15892.83667 | 52                    | C <sub>13</sub> H <sub>12</sub> N <sub>6</sub>                 | [M + Acetate] <sup>−</sup> | 1.04                   |                                                                                                                                                                                                                                                                                                                                                                                     | 0.24            | 0.6477          |
| 311.12652  | 15892.83667 | 52                    | C <sub>10</sub> H <sub>21</sub> O <sub>5</sub> P               | [M + Acetate] <sup>−</sup> | 0.01                   |                                                                                                                                                                                                                                                                                                                                                                                     | 0.89            | 0.0179          |
| 311.12652  | 15892.83667 | 52                    | C <sub>5</sub> H <sub>18</sub> N <sub>8</sub> P <sub>2</sub>   | [M + Acetate] <sup>−</sup> | −0.97                  |                                                                                                                                                                                                                                                                                                                                                                                     | 0.00            | 1.0000          |
| 311.12652  | 15892.83667 | 52                    | C <sub>13</sub> H <sub>24</sub> O <sub>6</sub>                 | [M + Cl] <sup>−</sup>      | −0.55                  |                                                                                                                                                                                                                                                                                                                                                                                     | 0.24            | 0.6477          |

Table S1. Cont.

| <i>m/z</i> | Intensity   | ID SIP<br>(Figure S5) | Empirical formula<br>(all- <sup>12</sup> C containing<br>peak)              | Ion form                   | Mass<br>error<br>(ppm) | KEGG compound                                                                                                                                                                                                                                                                                                                                                                                               | <i>r</i> -value | <i>p</i> -value |
|------------|-------------|-----------------------|-----------------------------------------------------------------------------|----------------------------|------------------------|-------------------------------------------------------------------------------------------------------------------------------------------------------------------------------------------------------------------------------------------------------------------------------------------------------------------------------------------------------------------------------------------------------------|-----------------|-----------------|
| 311.12652  | 15892.83667 | 52                    | C <sub>15</sub> H <sub>16</sub> N <sub>6</sub> O <sub>2</sub>               | [M – H] <sup>–</sup>       | 1.04                   |                                                                                                                                                                                                                                                                                                                                                                                                             | –0.11           | 0.8313          |
| 311.12652  | 15892.83667 | 52                    | C <sub>12</sub> H <sub>25</sub> O <sub>7</sub> P                            | [M – H] <sup>–</sup>       | 0.01                   |                                                                                                                                                                                                                                                                                                                                                                                                             | 0.52            | 0.2900          |
| 311.12652  | 15892.83667 | 52                    | C <sub>7</sub> H <sub>22</sub> N <sub>8</sub> O <sub>2</sub> P <sub>2</sub> | [M – H] <sup>–</sup>       | –0.97                  |                                                                                                                                                                                                                                                                                                                                                                                                             | –0.96           | 0.0363          |
| 311.12652  | 15892.83667 | 52                    | C <sub>8</sub> H <sub>16</sub> N <sub>12</sub> S                            | [M – H] <sup>–</sup>       | –1.17                  |                                                                                                                                                                                                                                                                                                                                                                                                             | –0.38           | 0.5302          |
| 311.22252  | 230176.5167 | 53                    | C <sub>16</sub> H <sub>28</sub> O <sub>2</sub>                              | [M + Acetate] <sup>–</sup> | –0.85                  | [Hydnocarpic acid]<br>[(7 <i>S</i> ,8 <i>S</i> )-DiHODE,<br>(9 <i>Z</i> ,11 <i>E</i> )-(13 <i>S</i> )-13-Hydroperoxyoctadeca-9,11-dienoic acid,<br>(9 <i>Z</i> ,12 <i>Z</i> )-(11 <i>S</i> )-11-Hydroperoxyoctadeca-9,12-dienoic acid,<br>12,13-Epoxy-9-hydroxy-10-octadecenoate,<br>8( <i>R</i> )-HPODE, 9( <i>S</i> )-HPODE', 9,10-12,13-Diepoxyoctadecanoate,<br>9,10-Epoxy-13-hydroxy-11-octadecenoate] | 0.73            | 0.0113          |
| 311.22252  | 230176.5167 | 53                    | C <sub>18</sub> H <sub>32</sub> O <sub>4</sub>                              | [M – H] <sup>–</sup>       | –0.85                  |                                                                                                                                                                                                                                                                                                                                                                                                             | 0.99            | 0.0000          |
| 313.23816  | 206802.6367 | 54                    | C <sub>16</sub> H <sub>30</sub> O <sub>2</sub>                              | [M + Acetate] <sup>–</sup> | –0.87                  | [(9 <i>Z</i> )-Hexadecenoic acid]                                                                                                                                                                                                                                                                                                                                                                           | 0.99            | 0.0000          |
| 313.23816  | 206802.6367 | 54                    | C <sub>18</sub> H <sub>34</sub> O <sub>4</sub>                              | [M – H] <sup>–</sup>       | –0.87                  | [(9 <i>Z</i> )-(7 <i>S</i> ,8 <i>S</i> )-Dihydroxyoctadecenoic acid,<br>12,13-DHOME, 9,10-DHOME]                                                                                                                                                                                                                                                                                                            | 0.90            | 0.0000          |
| 317.11583  | 32528.65833 | 55                    | C <sub>12</sub> H <sub>19</sub> O <sub>4</sub> P                            | [M + Acetate] <sup>–</sup> | –0.38                  |                                                                                                                                                                                                                                                                                                                                                                                                             | 0.50            | 0.3151          |
| 317.11583  | 32528.65833 | 55                    | C <sub>15</sub> H <sub>22</sub> O <sub>5</sub>                              | [M + Cl] <sup>–</sup>      | –0.94                  | [Dihydrophaseic acid, Hymenoxon, Qing Hau Sau]                                                                                                                                                                                                                                                                                                                                                              | –0.15           | 0.7821          |
| 317.11583  | 32528.65833 | 55                    | C <sub>17</sub> H <sub>14</sub> N <sub>6</sub> O                            | [M – H] <sup>–</sup>       | 0.62                   |                                                                                                                                                                                                                                                                                                                                                                                                             | –0.33           | 0.5283          |
| 317.11583  | 32528.65833 | 55                    | C <sub>14</sub> H <sub>23</sub> O <sub>6</sub> P                            | [M – H] <sup>–</sup>       | –0.38                  |                                                                                                                                                                                                                                                                                                                                                                                                             | 0.00            | 0.9977          |
| 317.11583  | 32528.65833 | 55                    | C <sub>9</sub> H <sub>20</sub> N <sub>8</sub> OP <sub>2</sub>               | [M – H] <sup>–</sup>       | –1.35                  |                                                                                                                                                                                                                                                                                                                                                                                                             | 0.72            | 0.1073          |
| 323.09025  | 17448.7     | 56                    | C <sub>13</sub> H <sub>8</sub> N <sub>6</sub> O                             | [M + Acetate] <sup>–</sup> | 1.35                   |                                                                                                                                                                                                                                                                                                                                                                                                             | 0.24            | 0.6093          |
| 323.09025  | 17448.7     | 56                    | C <sub>10</sub> H <sub>17</sub> O <sub>6</sub> P                            | [M + Acetate] <sup>–</sup> | 0.37                   |                                                                                                                                                                                                                                                                                                                                                                                                             | –0.55           | 0.1966          |
| 323.09025  | 17448.7     | 56                    | C <sub>5</sub> H <sub>14</sub> N <sub>8</sub> OP <sub>2</sub>               | [M + Acetate] <sup>–</sup> | –0.58                  |                                                                                                                                                                                                                                                                                                                                                                                                             | 0.00            | 1.0000          |
| 323.09025  | 17448.7     | 56                    | C <sub>13</sub> H <sub>20</sub> O <sub>7</sub>                              | [M + Cl] <sup>–</sup>      | –0.18                  |                                                                                                                                                                                                                                                                                                                                                                                                             | 0.24            | 0.6093          |
| 323.09025  | 17448.7     | 56                    | C <sub>8</sub> H <sub>17</sub> N <sub>8</sub> O <sub>2</sub> P              | [M + Cl] <sup>–</sup>      | –1.12                  |                                                                                                                                                                                                                                                                                                                                                                                                             | –0.67           | 0.2123          |

Table S1. Cont.

| <i>m/z</i> | Intensity   | ID SIP<br>(Figure S5) | Empirical formula<br>(all- <sup>12</sup> C containing<br>peak)              | Ion form                   | Mass<br>error<br>(ppm) | KEGG compound                                                                                                                                                                                                                                                                                                      | <i>r</i> -value | <i>p</i> -value |
|------------|-------------|-----------------------|-----------------------------------------------------------------------------|----------------------------|------------------------|--------------------------------------------------------------------------------------------------------------------------------------------------------------------------------------------------------------------------------------------------------------------------------------------------------------------|-----------------|-----------------|
| 323.09025  | 17448.7     | 56                    | C <sub>15</sub> H <sub>12</sub> N <sub>6</sub> O <sub>3</sub>               | [M – H] <sup>–</sup>       | 1.35                   |                                                                                                                                                                                                                                                                                                                    | 0.59            | 0.1670          |
| 323.09025  | 17448.7     | 56                    | C <sub>23</sub> H <sub>16</sub> S                                           | [M – H] <sup>–</sup>       | 0.79                   |                                                                                                                                                                                                                                                                                                                    | 0.87            | 0.0113          |
| 323.09025  | 17448.7     | 56                    | C <sub>8</sub> H <sub>20</sub> N <sub>8</sub> S <sub>3</sub>                | [M – H] <sup>–</sup>       | 0.68                   |                                                                                                                                                                                                                                                                                                                    | –0.67           | 0.2123          |
| 323.09025  | 17448.7     | 56                    | C <sub>12</sub> H <sub>21</sub> O <sub>8</sub> P                            | [M – H] <sup>–</sup>       | 0.37                   |                                                                                                                                                                                                                                                                                                                    | –0.06           | 0.8995          |
| 323.09025  | 17448.7     | 56                    | C <sub>7</sub> H <sub>18</sub> N <sub>8</sub> O <sub>3</sub> P <sub>2</sub> | [M – H] <sup>–</sup>       | –0.58                  |                                                                                                                                                                                                                                                                                                                    | –0.92           | 0.0769          |
| 323.09025  | 17448.7     | 56                    | C <sub>8</sub> H <sub>12</sub> N <sub>12</sub> OS                           | [M – H] <sup>–</sup>       | –0.77                  |                                                                                                                                                                                                                                                                                                                    | –0.67           | 0.2123          |
| 323.09025  | 17448.7     | 56                    | C <sub>15</sub> H <sub>22</sub> N <sub>2</sub> P <sub>2</sub> S             | [M – H] <sup>–</sup>       | –1.14                  |                                                                                                                                                                                                                                                                                                                    | 0.59            | 0.1670          |
| 329.17526  | 165026.9233 | 57                    | C <sub>12</sub> H <sub>23</sub> N <sub>4</sub> OP                           | [M + Acetate] <sup>–</sup> | 1.39                   |                                                                                                                                                                                                                                                                                                                    | 0.73            | 0.1630          |
| 329.17526  | 165026.9233 | 57                    | C <sub>15</sub> H <sub>26</sub> N <sub>4</sub> O <sub>2</sub>               | [M + Cl] <sup>–</sup>      | 0.86                   |                                                                                                                                                                                                                                                                                                                    | 0.23            | 0.6550          |
| 329.17526  | 165026.9233 | 57                    | C <sub>8</sub> H <sub>26</sub> N <sub>10</sub> S                            | [M + Cl] <sup>–</sup>      | –1.23                  |                                                                                                                                                                                                                                                                                                                    | 0.00            | 1.0000          |
| 329.17526  | 165026.9233 | 57                    | C <sub>14</sub> H <sub>27</sub> N <sub>4</sub> O <sub>3</sub> P             | [M – H] <sup>–</sup>       | 1.39                   |                                                                                                                                                                                                                                                                                                                    | 0.46            | 0.3587          |
| 329.17526  | 165026.9233 | 57                    | C <sub>7</sub> H <sub>27</sub> N <sub>10</sub> OPS                          | [M – H] <sup>–</sup>       | –0.69                  |                                                                                                                                                                                                                                                                                                                    | 0.00            | 1.0000          |
| 335.22239  | 195300.676  | 58                    | C <sub>18</sub> H <sub>28</sub> O <sub>2</sub>                              | [M + Acetate] <sup>–</sup> | –1.17                  | [Kinoprene, Stearidonic acid]                                                                                                                                                                                                                                                                                      | 0.24            | 0.6521          |
| 335.22239  | 195300.676  | 58                    | C <sub>15</sub> H <sub>32</sub> N <sub>4</sub> O <sub>2</sub>               | [M + Cl] <sup>–</sup>      | 1.38                   |                                                                                                                                                                                                                                                                                                                    | 0.92            | 0.0087          |
|            |             |                       |                                                                             |                            |                        | [(13 <i>E</i> )-(15 <i>S</i> )-15-Hydroxy-9-oxoprosta-10,13-dienoate,<br>(13 <i>E</i> )-(15 <i>S</i> )-15-Hydroxy-9-oxoprosta-11,13-dienoate,<br>(5 <i>Z</i> ,9 <i>E</i> ,14 <i>Z</i> )-(8 <i>xi</i> ,11 <i>R</i> ,12 <i>S</i> )-11,12-Epoxy-8-hydroxyicos-<br>5,9,14-trienoic acid,                               |                 |                 |
| 335.22239  | 195300.676  | 58                    | C <sub>20</sub> H <sub>32</sub> O <sub>4</sub>                              | [M – H] <sup>–</sup>       | –1.17                  | 11( <i>R</i> )-HPETE, 11H-14,15-EETA, 12( <i>R</i> )-HPETE,<br>12( <i>S</i> )-HPETE, 15( <i>S</i> )-HPETE, 15H-11,12-EETA,<br>5( <i>S</i> )-HPETE, 8( <i>R</i> )-HPETE, 8( <i>S</i> )-HPETE, 9( <i>S</i> )-HPETE,<br>Diterpenoid SP-II, Hepoxilin A3, Hepoxilin B3,<br>Leukotriene B4, Portulal, Prostaglandin B1] | –0.07           | 0.8882          |

Table S1. Cont.

| <i>m/z</i> | Intensity   | ID SIP<br>(Figure S5) | Empirical formula<br>(all- <sup>12</sup> C containing<br>peak)               | Ion form                   | Mass<br>error<br>(ppm) | KEGG compound                                                                                                             | <i>r</i> -value | <i>p</i> -value |
|------------|-------------|-----------------------|------------------------------------------------------------------------------|----------------------------|------------------------|---------------------------------------------------------------------------------------------------------------------------|-----------------|-----------------|
| 339.25374  | 83610.57833 | 59                    | C <sub>18</sub> H <sub>32</sub> O <sub>2</sub>                               | [M + Acetate] <sup>−</sup> | −1.01                  | [9- <i>cis</i> ,11- <i>trans</i> -Octadecadienoate, Chaulmoogric acid,<br>Linoleate, Malvalic acid, Stearolic acid]       | 0.96            | 0.0000          |
| 339.25374  | 83610.57833 | 59                    | C <sub>20</sub> H <sub>36</sub> O <sub>4</sub>                               | [M − H] <sup>−</sup>       | −1.01                  |                                                                                                                           | 0.91            | 0.0001          |
| 367.21253  | 38839.35667 | 60                    | C <sub>18</sub> H <sub>28</sub> O <sub>4</sub>                               | [M + Acetate] <sup>−</sup> | −0.23                  | [5- <i>O</i> -Methylembelin, Soraphen O]                                                                                  | 0.83            | 0.0008          |
| 367.21253  | 38839.35667 | 60                    | C <sub>15</sub> H <sub>37</sub> N <sub>4</sub> PS <sub>2</sub>               | [M − H] <sup>−</sup>       | 0.21                   |                                                                                                                           | 0.54            | 0.0676          |
| 367.21253  | 38839.35667 | 60                    | C <sub>20</sub> H <sub>32</sub> O <sub>6</sub>                               | [M − H] <sup>−</sup>       | −0.23                  | [11-Dehydro-thromboxane B2, 6-Keto-prostaglandin E1,<br>Cinnassiol D2, Cinnassiol D3,<br>Platenolide A, Prostaglandin G2] | 0.62            | 0.0316          |
| 367.21253  | 38839.35667 | 60                    | C <sub>15</sub> H <sub>29</sub> N <sub>8</sub> OP                            | [M − H] <sup>−</sup>       | −1.06                  |                                                                                                                           | 0.54            | 0.0676          |
| 371.22577  | 56509.405   | 61                    | C <sub>10</sub> H <sub>28</sub> N <sub>6</sub> O <sub>5</sub>                | [M + Acetate] <sup>−</sup> | −0.55                  |                                                                                                                           | 0.84            | 0.0182          |
| 371.22577  | 56509.405   | 61                    | C <sub>18</sub> H <sub>32</sub> O <sub>2</sub> S                             | [M + Acetate] <sup>−</sup> | −1.04                  |                                                                                                                           | −0.55           | 0.1593          |
| 371.22577  | 56509.405   | 61                    | C <sub>5</sub> H <sub>25</sub> N <sub>14</sub> P                             | [M + Acetate] <sup>−</sup> | −1.37                  |                                                                                                                           | 0.00            | 1.0000          |
| 371.22577  | 56509.405   | 61                    | C <sub>15</sub> H <sub>36</sub> N <sub>4</sub> O <sub>2</sub> S              | [M + Cl] <sup>−</sup>      | 1.27                   |                                                                                                                           | −0.21           | 0.6247          |
| 371.22577  | 56509.405   | 61                    | C <sub>23</sub> H <sub>32</sub> N <sub>2</sub>                               | [M + Cl] <sup>−</sup>      | −0.48                  |                                                                                                                           | −0.62           | 0.0982          |
| 371.22577  | 56509.405   | 61                    | C <sub>22</sub> H <sub>33</sub> N <sub>2</sub> OP                            | [M − H] <sup>−</sup>       | −0.01                  |                                                                                                                           | −0.62           | 0.0997          |
| 371.22577  | 56509.405   | 61                    | C <sub>12</sub> H <sub>32</sub> N <sub>6</sub> O <sub>7</sub>                | [M − H] <sup>−</sup>       | −0.55                  |                                                                                                                           | 0.69            | 0.0558          |
| 371.22577  | 56509.405   | 61                    | C <sub>20</sub> H <sub>36</sub> O <sub>4</sub> S                             | [M − H] <sup>−</sup>       | −1.04                  |                                                                                                                           | −0.61           | 0.1120          |
| 371.22577  | 56509.405   | 61                    | C <sub>7</sub> H <sub>29</sub> N <sub>14</sub> O <sub>2</sub> P              | [M − H] <sup>−</sup>       | −1.37                  |                                                                                                                           | −0.54           | 0.4650          |
| 371.13767  | 48627.795   | 62                    | C <sub>14</sub> H <sub>21</sub> N <sub>2</sub> O <sub>4</sub> P              | [M + Acetate] <sup>−</sup> | −0.21                  |                                                                                                                           | 0.98            | 0.0000          |
| 371.13767  | 48627.795   | 62                    | C <sub>12</sub> H <sub>24</sub> O <sub>7</sub> S                             | [M + Acetate] <sup>−</sup> | −1.24                  |                                                                                                                           | 0.48            | 0.2258          |
| 371.13767  | 48627.795   | 62                    | C <sub>17</sub> H <sub>24</sub> N <sub>2</sub> O <sub>5</sub>                | [M + Cl] <sup>−</sup>      | −0.69                  |                                                                                                                           | 0.56            | 0.1532          |
| 371.13767  | 48627.795   | 62                    | C <sub>19</sub> H <sub>16</sub> N <sub>8</sub> O                             | [M − H] <sup>−</sup>       | 0.65                   |                                                                                                                           | 0.21            | 0.6249          |
| 371.13767  | 48627.795   | 62                    | C <sub>11</sub> H <sub>30</sub> N <sub>6</sub> P <sub>2</sub> S <sub>2</sub> | [M − H] <sup>−</sup>       | 0.22                   |                                                                                                                           | −0.14           | 0.7618          |
| 371.13767  | 48627.795   | 62                    | C <sub>16</sub> H <sub>25</sub> N <sub>2</sub> O <sub>6</sub> P              | [M − H] <sup>−</sup>       | −0.21                  |                                                                                                                           | 0.77            | 0.0245          |

Table S1. Cont.

| <i>m/z</i> | Intensity   | ID SIP<br>(Figure S5) | Empirical formula<br>(all- <sup>12</sup> C containing<br>peak)  | Ion form                   | Mass<br>error<br>(ppm) | KEGG compound                                                                                                               | <i>r</i> -value | <i>p</i> -value |
|------------|-------------|-----------------------|-----------------------------------------------------------------|----------------------------|------------------------|-----------------------------------------------------------------------------------------------------------------------------|-----------------|-----------------|
| 371.13767  | 48627.795   | 62                    | C <sub>11</sub> H <sub>22</sub> N <sub>10</sub> OP <sub>2</sub> | [M - H] <sup>-</sup>       | -1.04                  |                                                                                                                             | -0.14           | 0.7618          |
| 371.13767  | 48627.795   | 62                    | C <sub>14</sub> H <sub>28</sub> O <sub>9</sub> S                | [M - H] <sup>-</sup>       | -1.24                  |                                                                                                                             | 0.98            | 0.0000          |
| 371.13767  | 48627.795   | 62                    | C <sub>18</sub> H <sub>32</sub> P <sub>4</sub>                  | [M - H] <sup>-</sup>       | -1.36                  |                                                                                                                             | 0.36            | 0.3800          |
| 381.22810  | 224680.45   | 63                    | C <sub>19</sub> H <sub>30</sub> O <sub>4</sub>                  | [M + Acetate] <sup>-</sup> | -0.43                  | (8)-Gingerol, Decylubiquinone, Rapanone]                                                                                    | 0.85            | 0.0000          |
| 381.22810  | 224680.45   | 63                    | C <sub>10</sub> H <sub>32</sub> N <sub>12</sub> P <sub>2</sub>  | [M - H] <sup>-</sup>       | 1.48                   |                                                                                                                             | 0.12            | 0.7597          |
| 381.22810  | 224680.45   | 63                    | C <sub>16</sub> H <sub>39</sub> N <sub>4</sub> PS <sub>2</sub>  | [M - H] <sup>-</sup>       | 0                      |                                                                                                                             | 0.25            | 0.3607          |
| 381.22810  | 224680.45   | 63                    | C <sub>21</sub> H <sub>34</sub> O <sub>6</sub>                  | [M - H] <sup>-</sup>       | -0.43                  | [Sarcostin]                                                                                                                 | 0.96            | 0.0000          |
| 381.22810  | 224680.45   | 63                    | C <sub>16</sub> H <sub>31</sub> N <sub>8</sub> OP               | [M - H] <sup>-</sup>       | -1.23                  |                                                                                                                             | 0.25            | 0.3607          |
| 365.19674  | 19472.78333 | 64                    | C <sub>18</sub> H <sub>26</sub> O <sub>4</sub>                  | [M + Acetate] <sup>-</sup> | -0.61                  | [Compactin diol lactone, Di- <i>n</i> -pentyl phthalate]                                                                    | -0.38           | 0.4029          |
| 365.19674  | 19472.78333 | 64                    | C <sub>9</sub> H <sub>28</sub> N <sub>12</sub> P <sub>2</sub>   | [M - H] <sup>-</sup>       | 1.38                   |                                                                                                                             | 0.00            | 1.0000          |
| 365.19674  | 19472.78333 | 64                    | C <sub>15</sub> H <sub>35</sub> N <sub>4</sub> PS <sub>2</sub>  | [M - H] <sup>-</sup>       | -0.17                  |                                                                                                                             | 0.96            | 0.0377          |
| 365.19674  | 19472.78333 | 64                    | C <sub>20</sub> H <sub>30</sub> O <sub>6</sub>                  | [M - H] <sup>-</sup>       | -0.61                  | [20-COOH-Leukotriene B4,<br>Bis(2-butoxyethyl)phthalate, Chaparrolide]                                                      | -0.65           | 0.0575          |
| 365.19674  | 19472.78333 | 64                    | C <sub>15</sub> H <sub>27</sub> N <sub>8</sub> OP               | [M - H] <sup>-</sup>       | -1.45                  |                                                                                                                             | 0.96            | 0.0377          |
| 381.26448  | 80093.695   | 65                    | C <sub>20</sub> H <sub>34</sub> O <sub>3</sub>                  | [M + Acetate] <sup>-</sup> | -0.44                  | [17alpha-Methyl-5alpha-androstane-3beta,11beta,17beta-triol,<br>2alpha-(Hydroxymethyl)-5alpha-androstane-3beta,17beta-diol] | 0.86            | 0.0000          |
| 381.26448  | 80093.695   | 65                    | C <sub>22</sub> H <sub>38</sub> O <sub>5</sub>                  | [M - H] <sup>-</sup>       | -0.44                  |                                                                                                                             | 0.98            | 0.0000          |
| 381.26448  | 80093.695   | 65                    | C <sub>17</sub> H <sub>35</sub> N <sub>8</sub> P                | [M - H] <sup>-</sup>       | -1.24                  |                                                                                                                             | 0.25            | 0.3927          |
| 383.18395  | 71100.83333 | 66                    | C <sub>17</sub> H <sub>20</sub> N <sub>6</sub> O                | [M + Acetate] <sup>-</sup> | 0.62                   |                                                                                                                             | 0.92            | 0.0013          |
| 383.18395  | 71100.83333 | 66                    | C <sub>14</sub> H <sub>29</sub> O <sub>6</sub> P                | [M + Acetate] <sup>-</sup> | -0.21                  |                                                                                                                             | 0.74            | 0.0364          |
| 383.18395  | 71100.83333 | 66                    | C <sub>9</sub> H <sub>26</sub> N <sub>8</sub> OP <sub>2</sub>   | [M + Acetate] <sup>-</sup> | -1.01                  |                                                                                                                             | -0.50           | 0.3866          |
| 383.18395  | 71100.83333 | 66                    | C <sub>17</sub> H <sub>32</sub> O <sub>7</sub>                  | [M + Cl] <sup>-</sup>      | -0.67                  |                                                                                                                             | 0.92            | 0.0013          |
| 383.18395  | 71100.83333 | 66                    | C <sub>12</sub> H <sub>29</sub> N <sub>8</sub> O <sub>2</sub> P | [M + Cl] <sup>-</sup>      | -1.47                  |                                                                                                                             | 0.10            | 0.8199          |

Table S1. Cont.

| <i>m/z</i> | Intensity   | ID SIP<br>(Figure S5) | Empirical formula<br>(all- <sup>12</sup> C containing<br>peak)               | Ion form                   | Mass<br>error<br>(ppm) | KEGG compound                                                                                                                                                                                                                                                                            | <i>r</i> -value | <i>p</i> -value |
|------------|-------------|-----------------------|------------------------------------------------------------------------------|----------------------------|------------------------|------------------------------------------------------------------------------------------------------------------------------------------------------------------------------------------------------------------------------------------------------------------------------------------|-----------------|-----------------|
| 383.18395  | 71100.83333 | 66                    | C <sub>19</sub> H <sub>24</sub> N <sub>6</sub> O <sub>3</sub>                | [M – H] <sup>–</sup>       | 0.62                   |                                                                                                                                                                                                                                                                                          | 0.71            | 0.0472          |
| 383.18395  | 71100.83333 | 66                    | C <sub>27</sub> H <sub>28</sub> S                                            | [M – H] <sup>–</sup>       | 0.14                   |                                                                                                                                                                                                                                                                                          | 0.29            | 0.4788          |
| 383.18395  | 71100.83333 | 66                    | C <sub>12</sub> H <sub>32</sub> N <sub>8</sub> S <sub>3</sub>                | [M – H] <sup>–</sup>       | 0.05                   |                                                                                                                                                                                                                                                                                          | 0.10            | 0.8199          |
| 383.18395  | 71100.83333 | 66                    | C <sub>16</sub> H <sub>33</sub> O <sub>8</sub> P                             | [M – H] <sup>–</sup>       | –0.21                  |                                                                                                                                                                                                                                                                                          | 0.98            | 0.0000          |
| 383.18395  | 71100.83333 | 66                    | C <sub>11</sub> H <sub>30</sub> N <sub>8</sub> O <sub>3</sub> P <sub>2</sub> | [M – H] <sup>–</sup>       | –1.01                  |                                                                                                                                                                                                                                                                                          | –0.21           | 0.6458          |
| 383.18395  | 71100.83333 | 66                    | C <sub>12</sub> H <sub>24</sub> N <sub>12</sub> OS                           | [M – H] <sup>–</sup>       | –1.17                  |                                                                                                                                                                                                                                                                                          | 0.10            | 0.8199          |
| 383.18395  | 71100.83333 | 66                    | C <sub>19</sub> H <sub>34</sub> N <sub>2</sub> P <sub>2</sub> S              | [M – H] <sup>–</sup>       | –1.49                  |                                                                                                                                                                                                                                                                                          | 0.71            | 0.0472          |
| 381.22810  | 224680.45   | 67                    | C <sub>19</sub> H <sub>30</sub> O <sub>4</sub>                               | [M + Acetate] <sup>–</sup> | –0.43                  | [(8)-Gingerol, Decylubiquinone, Rapanone]                                                                                                                                                                                                                                                | 0.85            | 0.0000          |
| 381.22810  | 224680.45   | 67                    | C <sub>10</sub> H <sub>32</sub> N <sub>12</sub> P <sub>2</sub>               | [M – H] <sup>–</sup>       | 1.48                   |                                                                                                                                                                                                                                                                                          | 0.12            | 0.7597          |
| 381.22810  | 224680.45   | 67                    | C <sub>16</sub> H <sub>39</sub> N <sub>4</sub> PS <sub>2</sub>               | [M – H] <sup>–</sup>       | 0                      |                                                                                                                                                                                                                                                                                          | 0.25            | 0.3607          |
| 381.22810  | 224680.45   | 67                    | C <sub>21</sub> H <sub>34</sub> O <sub>6</sub>                               | [M – H] <sup>–</sup>       | –0.43                  | [Sarcostin]                                                                                                                                                                                                                                                                              | 0.96            | 0.0000          |
| 381.22810  | 224680.45   | 67                    | C <sub>16</sub> H <sub>31</sub> N <sub>8</sub> OP                            | [M – H] <sup>–</sup>       | –1.23                  |                                                                                                                                                                                                                                                                                          | 0.25            | 0.3607          |
| 381.26448  | 80093.695   | 68                    | C <sub>20</sub> H <sub>34</sub> O <sub>3</sub>                               | [M + Acetate] <sup>–</sup> | –0.44                  | [17alpha-Methyl-5alpha-androstane-3beta,11beta,17beta-triol,<br>2alpha-(Hydroxymethyl)-5alpha-androstane-3beta,17beta-diol]                                                                                                                                                              | 0.97            | 0.0000          |
| 381.26448  | 80093.695   | 68                    | C <sub>22</sub> H <sub>38</sub> O <sub>5</sub>                               | [M – H] <sup>–</sup>       | –0.44                  |                                                                                                                                                                                                                                                                                          | 0.89            | 0.0000          |
| 381.26448  | 80093.695   | 68                    | C <sub>17</sub> H <sub>35</sub> N <sub>8</sub> P                             | [M – H] <sup>–</sup>       | –1.24                  |                                                                                                                                                                                                                                                                                          | 0.60            | 0.0244          |
| 385.17832  | 35152.79833 | 69                    | C <sub>17</sub> H <sub>27</sub> O <sub>4</sub> P                             | [M + Acetate] <sup>–</sup> | –0.6                   |                                                                                                                                                                                                                                                                                          | 0.86            | 0.0122          |
| 385.17832  | 35152.79833 | 69                    | C <sub>20</sub> H <sub>30</sub> O <sub>5</sub>                               | [M + Cl] <sup>–</sup>      | –1.06                  | [(5Z,13E)-11alpha-Hydroxy-9,15-dioxoprost-13-enoate,<br>(5Z,13E)-6,9alpha-Epoxy-11alpha-hydroxy-15-<br>oxoprost-5,13-dienoate,<br>(5Z,13E)-9alpha-Hydroxy-11,15-dioxoprost-5,13-dienoate,<br>5S-Hydroperoxy-18R-HEPE, Chalcolactone,<br>Prostaglandin D3, Prostaglandin E3, Resolvin E1] | 0.99            | 0.0000          |

Table S1. Cont.

| <i>m/z</i> | Intensity   | ID SIP<br>(Figure S5) | Empirical formula<br>(all- <sup>12</sup> C containing<br>peak)               | Ion form                   | Mass<br>error<br>(ppm) | KEGG compound                           | <i>r</i> -value | <i>p</i> -value |
|------------|-------------|-----------------------|------------------------------------------------------------------------------|----------------------------|------------------------|-----------------------------------------|-----------------|-----------------|
| 385.17832  | 35152.79833 | 69                    | C <sub>22</sub> H <sub>30</sub> N <sub>2</sub> S <sub>2</sub>                | [M – H] <sup>–</sup>       | 1.44                   |                                         | 0.91            | 0.0049          |
| 385.17832  | 35152.79833 | 69                    | C <sub>8</sub> H <sub>29</sub> N <sub>12</sub> P <sub>3</sub>                | [M – H] <sup>–</sup>       | 1.28                   |                                         | 0.00            | 1.0000          |
| 385.17832  | 35152.79833 | 69                    | C <sub>22</sub> H <sub>22</sub> N <sub>6</sub> O                             | [M – H] <sup>–</sup>       | 0.23                   |                                         | 0.91            | 0.0049          |
| 385.17832  | 35152.79833 | 69                    | C <sub>7</sub> H <sub>26</sub> N <sub>14</sub> OS <sub>2</sub>               | [M – H] <sup>–</sup>       | 0.13                   |                                         | 0.00            | 1.0000          |
| 385.17832  | 35152.79833 | 69                    | C <sub>14</sub> H <sub>36</sub> N <sub>4</sub> P <sub>2</sub> S <sub>2</sub> | [M – H] <sup>–</sup>       | –0.18                  |                                         | 0.36            | 0.6396          |
| 385.17832  | 35152.79833 | 69                    | C <sub>19</sub> H <sub>31</sub> O <sub>6</sub> P                             | [M – H] <sup>–</sup>       | –0.6                   |                                         | 0.97            | 0.0004          |
| 385.17832  | 35152.79833 | 69                    | C <sub>14</sub> H <sub>28</sub> N <sub>8</sub> OP <sub>2</sub>               | [M – H] <sup>–</sup>       | –1.39                  |                                         | 0.36            | 0.6396          |
| 373.16557  | 25366.18    | 70                    | C <sub>11</sub> H <sub>26</sub> N <sub>2</sub> O <sub>6</sub> S              | [M + Acetate] <sup>–</sup> | 1.49                   |                                         | 0.98            | 0.1231          |
| 373.16557  | 25366.18    | 70                    | C <sub>6</sub> H <sub>23</sub> N <sub>10</sub> OPS                           | [M + Acetate] <sup>–</sup> | 0.67                   |                                         | 0.00            | 1.0000          |
| 373.16557  | 25366.18    | 70                    | C <sub>19</sub> H <sub>22</sub> O <sub>4</sub>                               | [M + Acetate] <sup>–</sup> | –0.25                  | [2,3-Dehydro-gibberellin A9, Heliettin] | 0.61            | 0.1985          |
| 373.16557  | 25366.18    | 70                    | C <sub>9</sub> H <sub>26</sub> N <sub>10</sub> O <sub>2</sub> S              | [M + Cl] <sup>–</sup>      | 0.2                    |                                         | –0.05           | 0.9653          |
| 373.16557  | 25366.18    | 70                    | C <sub>16</sub> H <sub>36</sub> OP <sub>2</sub> S                            | [M + Cl] <sup>–</sup>      | –0.12                  |                                         | 0.46            | 0.4405          |
| 373.16557  | 25366.18    | 70                    | C <sub>13</sub> H <sub>30</sub> N <sub>2</sub> O <sub>8</sub> S              | [M – H] <sup>–</sup>       | 1.49                   |                                         | 0.78            | 0.4303          |
| 373.16557  | 25366.18    | 70                    | C <sub>8</sub> H <sub>27</sub> N <sub>10</sub> O <sub>3</sub> PS             | [M – H] <sup>–</sup>       | 0.67                   |                                         | 0.00            | 1.0000          |
| 373.16557  | 25366.18    | 70                    | C <sub>16</sub> H <sub>31</sub> N <sub>4</sub> PS <sub>2</sub>               | [M – H] <sup>–</sup>       | 0.18                   |                                         | 0.46            | 0.4405          |
| 373.16557  | 25366.18    | 70                    | C <sub>21</sub> H <sub>26</sub> O <sub>6</sub>                               | [M – H] <sup>–</sup>       | –0.25                  | [Hexahydrocurcumin, Phantomolin]        | –0.18           | 0.7050          |
| 373.16557  | 25366.18    | 70                    | C <sub>16</sub> H <sub>23</sub> N <sub>8</sub> OP                            | [M – H] <sup>–</sup>       | –1.07                  |                                         | 0.46            | 0.4405          |
| 381.19168  | 45771.21333 | 71                    | C <sub>18</sub> H <sub>26</sub> O <sub>5</sub>                               | [M + Acetate] <sup>–</sup> | –0.52                  | [alpha-Zearalanol, beta-Zearalanol]     | –0.72           | 0.0271          |
| 381.19168  | 45771.21333 | 71                    | C <sub>13</sub> H <sub>23</sub> N <sub>8</sub> P                             | [M + Acetate] <sup>–</sup> | –1.32                  |                                         | –0.99           | 0.0099          |
| 381.19168  | 45771.21333 | 71                    | C <sub>10</sub> H <sub>27</sub> N <sub>12</sub> P                            | [M + Cl] <sup>–</sup>      | 0.92                   |                                         | 0.84            | 0.3594          |
| 381.19168  | 45771.21333 | 71                    | C <sub>16</sub> H <sub>34</sub> N <sub>4</sub> S <sub>2</sub>                | [M + Cl] <sup>–</sup>      | –0.56                  |                                         | –0.65           | 0.1141          |
| 381.19168  | 45771.21333 | 71                    | C <sub>9</sub> H <sub>28</sub> N <sub>12</sub> OP <sub>2</sub>               | [M – H] <sup>–</sup>       | 1.38                   |                                         | 0.95            | 0.2056          |
| 381.19168  | 45771.21333 | 71                    | C <sub>16</sub> H <sub>38</sub> N <sub>2</sub> P <sub>4</sub>                | [M – H] <sup>–</sup>       | 1.07                   |                                         | –0.65           | 0.1141          |
| 381.19168  | 45771.21333 | 71                    | C <sub>15</sub> H <sub>35</sub> N <sub>4</sub> OPS <sub>2</sub>              | [M – H] <sup>–</sup>       | –0.1                   |                                         | –0.73           | 0.0967          |



Table S1. Cont.

| <i>m/z</i> | Intensity   | ID SIP<br>(Figure S5) | Empirical formula<br>(all- <sup>12</sup> C containing<br>peak)               | Ion form                   | Mass<br>error<br>(ppm) | KEGG compound                      | <i>r</i> -value | <i>p</i> -value |
|------------|-------------|-----------------------|------------------------------------------------------------------------------|----------------------------|------------------------|------------------------------------|-----------------|-----------------|
| 381.19168  | 45771.21333 | 71                    | C <sub>20</sub> H <sub>30</sub> O <sub>7</sub>                               | [M – H] <sup>–</sup>       | –0.52                  | [Cinnassiol A, Cinnassiol C3]      | –0.56           | 0.0720          |
| 381.19168  | 45771.21333 | 71                    | C <sub>15</sub> H <sub>27</sub> N <sub>8</sub> O <sub>2</sub> P              | [M – H] <sup>–</sup>       | –1.32                  |                                    | –0.73           | 0.0967          |
| 389.21790  | 428073.7    | 72                    | C <sub>6</sub> H <sub>28</sub> N <sub>12</sub> P <sub>2</sub>                | [M + Acetate] <sup>–</sup> | 1.37                   |                                    | 0.00            | 1.0000          |
| 389.21790  | 428073.7    | 72                    | C <sub>17</sub> H <sub>30</sub> O <sub>6</sub>                               | [M + Acetate] <sup>–</sup> | –0.5                   |                                    | 0.96            | 0.0000          |
| 389.21790  | 428073.7    | 72                    | C <sub>12</sub> H <sub>27</sub> N <sub>8</sub> OP                            | [M + Acetate] <sup>–</sup> | –1.28                  |                                    | –0.24           | 0.5613          |
| 389.21790  | 428073.7    | 72                    | C <sub>9</sub> H <sub>31</sub> N <sub>12</sub> OP                            | [M + Cl] <sup>–</sup>      | 0.92                   |                                    | –0.98           | 0.0038          |
| 389.21790  | 428073.7    | 72                    | C <sub>8</sub> H <sub>32</sub> N <sub>12</sub> O <sub>2</sub> P <sub>2</sub> | [M – H] <sup>–</sup>       | 1.37                   |                                    | –0.98           | 0.0215          |
| 389.21790  | 428073.7    | 72                    | C <sub>19</sub> H <sub>34</sub> O <sub>8</sub>                               | [M – H] <sup>–</sup>       | –0.5                   | [Rehmaionoside A, Rehmaionoside B] | 0.62            | 0.0433          |
| 389.21790  | 428073.7    | 72                    | C <sub>14</sub> H <sub>31</sub> N <sub>8</sub> O <sub>3</sub> P              | [M – H] <sup>–</sup>       | –1.28                  |                                    | 0.68            | 0.0313          |
| 397.13244  | 18064.2318  | 73                    | C <sub>19</sub> H <sub>19</sub> N <sub>2</sub> O <sub>2</sub> P              | [M + Acetate] <sup>–</sup> | 0.43                   |                                    | –0.92           | 0.0087          |
| 397.13244  | 18064.2318  | 73                    | C <sub>9</sub> H <sub>18</sub> N <sub>6</sub> O <sub>8</sub>                 | [M + Acetate] <sup>–</sup> | –0.07                  |                                    | –0.62           | 0.1910          |
| 397.13244  | 18064.2318  | 73                    | C <sub>17</sub> H <sub>22</sub> O <sub>5</sub> S                             | [M + Acetate] <sup>–</sup> | –0.53                  |                                    | –0.94           | 0.0060          |
| 397.13244  | 18064.2318  | 73                    | C <sub>4</sub> H <sub>15</sub> N <sub>14</sub> O <sub>3</sub> P              | [M + Acetate] <sup>–</sup> | –0.84                  |                                    | 0.83            | 0.3814          |
| 397.13244  | 18064.2318  | 73                    | C <sub>11</sub> H <sub>25</sub> N <sub>4</sub> O <sub>2</sub> P <sub>3</sub> | [M + Acetate] <sup>–</sup> | –1.14                  |                                    | –0.90           | 0.0151          |
| 397.13244  | 18064.2318  | 73                    | C <sub>12</sub> H <sub>19</sub> N <sub>8</sub> PS                            | [M + Acetate] <sup>–</sup> | –1.3                   |                                    | –0.93           | 0.0064          |
| 397.13244  | 18064.2318  | 73                    | C <sub>8</sub> H <sub>29</sub> N <sub>8</sub> O <sub>2</sub> P <sub>3</sub>  | [M + Cl] <sup>–</sup>      | 1.01                   |                                    | –0.22           | 0.6695          |
| 397.13244  | 18064.2318  | 73                    | C <sub>9</sub> H <sub>23</sub> N <sub>12</sub> PS                            | [M + Cl] <sup>–</sup>      | 0.86                   |                                    | –0.62           | 0.1910          |
| 397.13244  | 18064.2318  | 73                    | C <sub>22</sub> H <sub>22</sub> N <sub>2</sub> O <sub>3</sub>                | [M + Cl] <sup>–</sup>      | –0.01                  |                                    | –0.90           | 0.0131          |
| 397.13244  | 18064.2318  | 73                    | C <sub>7</sub> H <sub>26</sub> N <sub>10</sub> O <sub>3</sub> S <sub>2</sub> | [M + Cl] <sup>–</sup>      | –0.1                   |                                    | 0.34            | 0.5037          |
| 397.13244  | 18064.2318  | 73                    | C <sub>15</sub> H <sub>30</sub> N <sub>4</sub> S <sub>3</sub>                | [M + Cl] <sup>–</sup>      | –0.56                  |                                    | –0.95           | 0.0041          |
| 397.13244  | 18064.2318  | 73                    | C <sub>7</sub> H <sub>18</sub> N <sub>14</sub> O <sub>4</sub>                | [M + Cl] <sup>–</sup>      | –1.28                  |                                    | 0.34            | 0.5037          |
| 397.13244  | 18064.2318  | 73                    | C <sub>8</sub> H <sub>24</sub> N <sub>12</sub> OP <sub>2</sub> S             | [M – H] <sup>–</sup>       | 1.3                    |                                    | –0.22           | 0.6695          |
| 397.13244  | 18064.2318  | 73                    | C <sub>15</sub> H <sub>34</sub> N <sub>2</sub> P <sub>4</sub> S              | [M – H] <sup>–</sup>       | 0.99                   |                                    | –0.95           | 0.0041          |
| 397.13244  | 18064.2318  | 73                    | C <sub>21</sub> H <sub>23</sub> N <sub>2</sub> O <sub>4</sub> P              | [M – H] <sup>–</sup>       | 0.43                   |                                    | –0.91           | 0.0117          |

Table S1. Cont.

| <i>m/z</i> | Intensity   | ID SIP<br>(Figure S5) | Empirical formula<br>(all- <sup>12</sup> C containing<br>peak)               | Ion form                   | Mass<br>error<br>(ppm) | KEGG compound                 | <i>r</i> -value | <i>p</i> -value |
|------------|-------------|-----------------------|------------------------------------------------------------------------------|----------------------------|------------------------|-------------------------------|-----------------|-----------------|
| 397.13244  | 18064.2318  | 73                    | C <sub>11</sub> H <sub>22</sub> N <sub>6</sub> O <sub>10</sub>               | [M – H] <sup>–</sup>       | –0.07                  |                               | –0.90           | 0.0151          |
| 397.13244  | 18064.2318  | 73                    | C <sub>14</sub> H <sub>31</sub> N <sub>4</sub> OPS <sub>3</sub>              | [M – H] <sup>–</sup>       | –0.12                  |                               | –0.95           | 0.0037          |
| 397.13244  | 18064.2318  | 73                    | C <sub>19</sub> H <sub>26</sub> O <sub>7</sub> S                             | [M – H] <sup>–</sup>       | –0.53                  |                               | –0.92           | 0.0087          |
| 397.13244  | 18064.2318  | 73                    | C <sub>6</sub> H <sub>19</sub> N <sub>14</sub> O <sub>5</sub> P              | [M – H] <sup>–</sup>       | –0.84                  |                               | 0.59            | 0.2973          |
| 397.13244  | 18064.2318  | 73                    | C <sub>13</sub> H <sub>29</sub> N <sub>4</sub> O <sub>4</sub> P <sub>3</sub> | [M – H] <sup>–</sup>       | –1.14                  |                               | –0.95           | 0.0041          |
| 397.13244  | 18064.2318  | 73                    | C <sub>14</sub> H <sub>23</sub> N <sub>8</sub> O <sub>2</sub> PS             | [M – H] <sup>–</sup>       | –1.3                   |                               | –0.95           | 0.0037          |
| 389.24620  | 25568.11833 | 74                    | C <sub>18</sub> H <sub>35</sub> O <sub>3</sub> P                             | [M + Acetate] <sup>–</sup> | –0.09                  |                               | 0.46            | 0.2529          |
| 389.24620  | 25568.11833 | 74                    | C <sub>21</sub> H <sub>38</sub> O <sub>4</sub>                               | [M + Cl] <sup>–</sup>      | –0.54                  | ['Methyl acetyl ricinoleate'] | 0.97            | 0.0001          |
| 389.24620  | 25568.11833 | 74                    | C <sub>23</sub> H <sub>30</sub> N <sub>6</sub>                               | [M – H] <sup>–</sup>       | 0.73                   |                               | 0.75            | 0.0329          |
| 389.24620  | 25568.11833 | 74                    | C <sub>20</sub> H <sub>39</sub> O <sub>5</sub> P                             | [M – H] <sup>–</sup>       | –0.09                  |                               | 0.98            | 0.0000          |
| 389.24620  | 25568.11833 | 74                    | C <sub>15</sub> H <sub>36</sub> N <sub>8</sub> P <sub>2</sub>                | [M – H] <sup>–</sup>       | –0.88                  |                               | –0.53           | 0.1724          |
| 383.20734  | 57391.08667 | 75                    | C <sub>18</sub> H <sub>28</sub> O <sub>5</sub>                               | [M + Acetate] <sup>–</sup> | –0.49                  |                               | 0.36            | 0.2746          |
| 383.20734  | 57391.08667 | 75                    | C <sub>13</sub> H <sub>25</sub> N <sub>8</sub> P                             | [M + Acetate] <sup>–</sup> | –1.29                  |                               | 0.20            | 0.7111          |
| 383.20734  | 57391.08667 | 75                    | C <sub>10</sub> H <sub>29</sub> N <sub>12</sub> P                            | [M + Cl] <sup>–</sup>      | 0.95                   |                               | 0.28            | 0.8206          |
| 383.20734  | 57391.08667 | 75                    | C <sub>16</sub> H <sub>36</sub> N <sub>4</sub> S <sub>2</sub>                | [M + Cl] <sup>–</sup>      | –0.53                  |                               | 0.71            | 0.0312          |
| 383.20734  | 57391.08667 | 75                    | C <sub>9</sub> H <sub>30</sub> N <sub>12</sub> OP <sub>2</sub>               | [M – H] <sup>–</sup>       | 1.4                    |                               | 0.00            | 1.0000          |
| 383.20734  | 57391.08667 | 75                    | C <sub>16</sub> H <sub>40</sub> N <sub>2</sub> P <sub>4</sub>                | [M – H] <sup>–</sup>       | 1.09                   |                               | 0.71            | 0.0312          |
| 383.20734  | 57391.08667 | 75                    | C <sub>15</sub> H <sub>37</sub> N <sub>4</sub> OPS <sub>2</sub>              | [M – H] <sup>–</sup>       | –0.07                  |                               | 0.58            | 0.1278          |
| 383.20734  | 57391.08667 | 75                    | C <sub>20</sub> H <sub>32</sub> O <sub>7</sub>                               | [M – H] <sup>–</sup>       | –0.49                  |                               | –0.11           | 0.7265          |
| 383.20734  | 57391.08667 | 75                    | C <sub>15</sub> H <sub>29</sub> N <sub>8</sub> O <sub>2</sub> P              | [M – H] <sup>–</sup>       | –1.29                  |                               | 0.58            | 0.1278          |
| 393.18621  | 106041.4783 | 76                    | C <sub>26</sub> H <sub>22</sub>                                              | [M + Acetate] <sup>–</sup> | 0.52                   |                               | –0.25           | 0.4069          |
| 393.18621  | 106041.4783 | 76                    | C <sub>11</sub> H <sub>26</sub> N <sub>8</sub> S <sub>2</sub>                | [M + Acetate] <sup>–</sup> | 0.43                   |                               | –0.37           | 0.3677          |
| 393.18621  | 106041.4783 | 76                    | C <sub>11</sub> H <sub>18</sub> N <sub>12</sub> O                            | [M + Acetate] <sup>–</sup> | –0.75                  |                               | –0.37           | 0.3677          |
| 393.18621  | 106041.4783 | 76                    | C <sub>18</sub> H <sub>28</sub> N <sub>2</sub> P <sub>2</sub>                | [M + Acetate] <sup>–</sup> | –1.06                  |                               | 0.95            | 0.0000          |
| 393.18621  | 106041.4783 | 76                    | C <sub>15</sub> H <sub>32</sub> N <sub>6</sub> P <sub>2</sub>                | [M + Cl] <sup>–</sup>      | 1.11                   |                               | 0.81            | 0.0014          |

Table S1. Cont.

| <i>m/z</i> | Intensity   | ID SIP<br>(Figure S5) | Empirical formula<br>(all- <sup>12</sup> C containing<br>peak)               | Ion form                   | Mass<br>error<br>(ppm) | KEGG compound                                   | <i>r</i> -value | <i>p</i> -value |
|------------|-------------|-----------------------|------------------------------------------------------------------------------|----------------------------|------------------------|-------------------------------------------------|-----------------|-----------------|
| 393.18621  | 106041.4783 | 76                    | C <sub>5</sub> H <sub>26</sub> N <sub>14</sub> O <sub>5</sub> S              | [M - H] <sup>-</sup>       | 0.9                    |                                                 | 0.00            | 1.0000          |
| 393.18621  | 106041.4783 | 76                    | C <sub>28</sub> H <sub>26</sub> O <sub>2</sub>                               | [M - H] <sup>-</sup>       | 0.52                   |                                                 | -0.35           | 0.2432          |
| 393.18621  | 106041.4783 | 76                    | C <sub>13</sub> H <sub>30</sub> N <sub>8</sub> O <sub>2</sub> S <sub>2</sub> | [M - H] <sup>-</sup>       | 0.43                   |                                                 | 0.23            | 0.5298          |
| 393.18621  | 106041.4783 | 76                    | C <sub>13</sub> H <sub>22</sub> N <sub>12</sub> O <sub>3</sub>               | [M - H] <sup>-</sup>       | -0.75                  |                                                 | 0.23            | 0.5298          |
| 393.18621  | 106041.4783 | 76                    | C <sub>20</sub> H <sub>32</sub> N <sub>2</sub> O <sub>2</sub> P <sub>2</sub> | [M - H] <sup>-</sup>       | -1.06                  |                                                 | 0.66            | 0.0141          |
| 393.18621  | 106041.4783 | 76                    | C <sub>21</sub> H <sub>26</sub> N <sub>6</sub> S                             | [M - H] <sup>-</sup>       | -1.22                  |                                                 | 0.46            | 0.1177          |
| 399.19706  | 20047.98225 | 77                    | C <sub>25</sub> H <sub>24</sub> O                                            | [M + Acetate] <sup>-</sup> | 1.23                   |                                                 | -0.88           | 0.0009          |
| 399.19706  | 20047.98225 | 77                    | C <sub>10</sub> H <sub>28</sub> N <sub>8</sub> OS <sub>2</sub>               | [M + Acetate] <sup>-</sup> | 1.14                   |                                                 | 0.11            | 0.8071          |
| 399.19706  | 20047.98225 | 77                    | C <sub>10</sub> H <sub>20</sub> N <sub>12</sub> O <sub>2</sub>               | [M + Acetate] <sup>-</sup> | -0.03                  |                                                 | 0.11            | 0.8071          |
| 399.19706  | 20047.98225 | 77                    | C <sub>17</sub> H <sub>30</sub> N <sub>2</sub> OP <sub>2</sub>               | [M + Acetate] <sup>-</sup> | -0.33                  |                                                 | -0.09           | 0.8120          |
| 399.19706  | 20047.98225 | 77                    | C <sub>15</sub> H <sub>33</sub> O <sub>4</sub> PS                            | [M + Acetate] <sup>-</sup> | -1.29                  |                                                 | 0.50            | 0.1394          |
| 399.19706  | 20047.98225 | 77                    | C <sub>20</sub> H <sub>33</sub> N <sub>2</sub> O <sub>2</sub> P              | [M + Cl] <sup>-</sup>      | -0.77                  |                                                 | -0.66           | 0.0365          |
| 399.19706  | 20047.98225 | 77                    | C <sub>27</sub> H <sub>28</sub> O <sub>3</sub>                               | [M - H] <sup>-</sup>       | 1.23                   |                                                 | -0.89           | 0.0007          |
| 399.19706  | 20047.98225 | 77                    | C <sub>12</sub> H <sub>32</sub> N <sub>8</sub> O <sub>3</sub> S <sub>2</sub> | [M - H] <sup>-</sup>       | 1.14                   |                                                 | 0.81            | 0.0082          |
| 399.19706  | 20047.98225 | 77                    | C <sub>20</sub> H <sub>36</sub> N <sub>2</sub> S <sub>3</sub>                | [M - H] <sup>-</sup>       | 0.68                   |                                                 | -0.66           | 0.0365          |
| 399.19706  | 20047.98225 | 77                    | C <sub>12</sub> H <sub>24</sub> N <sub>12</sub> O <sub>4</sub>               | [M - H] <sup>-</sup>       | -0.03                  |                                                 | 0.81            | 0.0082          |
| 399.19706  | 20047.98225 | 77                    | C <sub>19</sub> H <sub>34</sub> N <sub>2</sub> O <sub>3</sub> P <sub>2</sub> | [M - H] <sup>-</sup>       | -0.33                  |                                                 | -0.53           | 0.1130          |
| 399.19706  | 20047.98225 | 77                    | C <sub>20</sub> H <sub>28</sub> N <sub>6</sub> OS                            | [M - H] <sup>-</sup>       | -0.49                  |                                                 | -0.66           | 0.0365          |
| 399.19706  | 20047.98225 | 77                    | C <sub>17</sub> H <sub>37</sub> O <sub>6</sub> PS                            | [M - H] <sup>-</sup>       | -1.29                  |                                                 | -0.09           | 0.8120          |
| 397.22321  | 234445.4    | 78                    | C <sub>19</sub> H <sub>30</sub> O <sub>5</sub>                               | [M + Acetate] <sup>-</sup> | 0.08                   | ['Piperonyl butoxide', 'Shiromodiol diacetate'] | 1.00            | 0.0000          |
| 397.22321  | 234445.4    | 78                    | C <sub>14</sub> H <sub>27</sub> N <sub>8</sub> P                             | [M + Acetate] <sup>-</sup> | -0.69                  |                                                 | -0.16           | 0.6670          |

Table S1. Cont.

| <i>m/z</i> | Intensity   | ID SIP<br>(Figure S5) | Empirical formula<br>(all- <sup>12</sup> C containing<br>peak)               | Ion form                   | Mass<br>error<br>(ppm) | KEGG compound              | <i>r</i> -value | <i>p</i> -value |
|------------|-------------|-----------------------|------------------------------------------------------------------------------|----------------------------|------------------------|----------------------------|-----------------|-----------------|
| 397.22321  | 234445.4    | 78                    | C <sub>11</sub> H <sub>31</sub> N <sub>12</sub> P                            | [M + Cl] <sup>−</sup>      | 1.47                   |                            | −0.87           | 0.0105          |
| 397.22321  | 234445.4    | 78                    | C <sub>17</sub> H <sub>38</sub> N <sub>4</sub> S <sub>2</sub>                | [M + Cl] <sup>−</sup>      | 0.05                   |                            | 0.84            | 0.0003          |
| 397.22321  | 234445.4    | 78                    | C <sub>17</sub> H <sub>30</sub> N <sub>8</sub> O                             | [M + Cl] <sup>−</sup>      | −1.13                  |                            | 0.84            | 0.0003          |
| 397.22321  | 234445.4    | 78                    | C <sub>16</sub> H <sub>39</sub> N <sub>4</sub> OPS <sub>2</sub>              | [M − H] <sup>−</sup>       | 0.49                   |                            | 0.60            | 0.0386          |
| 397.22321  | 234445.4    | 78                    | C <sub>21</sub> H <sub>34</sub> O <sub>7</sub>                               | [M − H] <sup>−</sup>       | 0.08                   |                            | 0.87            | 0.0000          |
| 397.22321  | 234445.4    | 78                    | C <sub>16</sub> H <sub>31</sub> N <sub>8</sub> O <sub>2</sub> P              | [M − H] <sup>−</sup>       | −0.69                  |                            | 0.60            | 0.0386          |
| 395.31626  | 35088.42333 | 79                    | C <sub>22</sub> H <sub>40</sub> O <sub>2</sub>                               | [M + Acetate] <sup>−</sup> | −1.07                  | [13,16-Docosadienoic acid] | 0.99            | 0.0000          |
| 395.31626  | 35088.42333 | 79                    | C <sub>19</sub> H <sub>44</sub> N <sub>4</sub> O <sub>2</sub>                | [M + Cl] <sup>−</sup>      | 1.09                   |                            | 0.54            | 0.0713          |
| 395.31626  | 35088.42333 | 79                    | C <sub>24</sub> H <sub>44</sub> O <sub>4</sub>                               | [M − H] <sup>−</sup>       | −1.07                  |                            | 0.85            | 0.0004          |
| 401.21809  | 75247.478   | 80                    | C <sub>18</sub> H <sub>30</sub> O <sub>6</sub>                               | [M + Acetate] <sup>−</sup> | −0.01                  |                            | 0.57            | 0.1843          |
| 401.21809  | 75247.478   | 80                    | C <sub>13</sub> H <sub>27</sub> N <sub>8</sub> OP                            | [M + Acetate] <sup>−</sup> | −0.77                  |                            | 0.21            | 0.6583          |
| 401.21809  | 75247.478   | 80                    | C <sub>10</sub> H <sub>31</sub> N <sub>12</sub> OP                           | [M + Cl] <sup>−</sup>      | 1.36                   |                            | −0.87           | 0.1338          |
| 401.21809  | 75247.478   | 80                    | C <sub>17</sub> H <sub>41</sub> N <sub>2</sub> P <sub>3</sub>                | [M + Cl] <sup>−</sup>      | 1.06                   |                            | 0.82            | 0.0245          |
| 401.21809  | 75247.478   | 80                    | C <sub>16</sub> H <sub>38</sub> N <sub>4</sub> OS <sub>2</sub>               | [M + Cl] <sup>−</sup>      | −0.04                  |                            | 0.91            | 0.0049          |
| 401.21809  | 75247.478   | 80                    | C <sub>16</sub> H <sub>30</sub> N <sub>8</sub> O <sub>2</sub>                | [M + Cl] <sup>−</sup>      | −1.21                  |                            | 0.91            | 0.0049          |
| 401.21809  | 75247.478   | 80                    | C <sub>20</sub> H <sub>34</sub> O <sub>8</sub>                               | [M − H] <sup>−</sup>       | −0.01                  |                            | 0.13            | 0.7761          |
| 401.21809  | 75247.478   | 80                    | C <sub>15</sub> H <sub>31</sub> N <sub>8</sub> O <sub>3</sub> P              | [M − H] <sup>−</sup>       | −0.77                  |                            | 0.75            | 0.0518          |
| 401.21809  | 75247.478   | 80                    | C <sub>23</sub> H <sub>35</sub> N <sub>2</sub> PS                            | [M − H] <sup>−</sup>       | −1.23                  |                            | −0.18           | 0.7015          |
| 403.23348  | 185445.3333 | 81                    | C <sub>7</sub> H <sub>30</sub> N <sub>12</sub> P <sub>2</sub>                | [M + Acetate] <sup>−</sup> | 1.15                   |                            | 0.00            | 1.0000          |
| 403.23348  | 185445.3333 | 81                    | C <sub>18</sub> H <sub>32</sub> O <sub>6</sub>                               | [M + Acetate] <sup>−</sup> | −0.65                  |                            | 0.68            | 0.0654          |
| 403.23348  | 185445.3333 | 81                    | C <sub>13</sub> H <sub>29</sub> N <sub>8</sub> OP                            | [M + Acetate] <sup>−</sup> | −1.41                  |                            | −0.88           | 0.0205          |
| 403.23348  | 185445.3333 | 81                    | C <sub>15</sub> H <sub>36</sub> N <sub>4</sub> O <sub>6</sub>                | [M + Cl] <sup>−</sup>      | 1.47                   |                            | −0.08           | 0.8504          |
| 403.23348  | 185445.3333 | 81                    | C <sub>10</sub> H <sub>33</sub> N <sub>12</sub> OP                           | [M + Cl] <sup>−</sup>      | 0.71                   |                            | 0.32            | 0.7915          |
| 403.23348  | 185445.3333 | 81                    | C <sub>9</sub> H <sub>34</sub> N <sub>12</sub> O <sub>2</sub> P <sub>2</sub> | [M − H] <sup>−</sup>       | 1.15                   |                            | 0.00            | 1.0000          |

Table S1. Cont.

| <i>m/z</i> | Intensity   | ID SIP<br>(Figure S5) | Empirical formula<br>(all- <sup>12</sup> C containing<br>peak)               | Ion form                   | Mass<br>error<br>(ppm) | KEGG compound            | <i>r</i> -value | <i>p</i> -value |
|------------|-------------|-----------------------|------------------------------------------------------------------------------|----------------------------|------------------------|--------------------------|-----------------|-----------------|
| 403.23348  | 185445.3333 | 81                    | C <sub>20</sub> H <sub>36</sub> O <sub>8</sub>                               | [M – H] <sup>–</sup>       | –0.65                  |                          | 0.78            | 0.0229          |
| 403.23348  | 185445.3333 | 81                    | C <sub>15</sub> H <sub>33</sub> N <sub>8</sub> O <sub>3</sub> P              | [M – H] <sup>–</sup>       | –1.41                  |                          | –0.08           | 0.8504          |
| 409.29594  | 15403.1562  | 82                    | C <sub>22</sub> H <sub>38</sub> O <sub>3</sub>                               | [M + Acetate] <sup>–</sup> | –0.02                  |                          | 0.99            | 0.0000          |
| 409.29594  | 15403.1562  | 82                    | C <sub>24</sub> H <sub>42</sub> O <sub>5</sub>                               | [M – H] <sup>–</sup>       | –0.02                  |                          | 0.91            | 0.0000          |
| 409.29594  | 15403.1562  | 82                    | C <sub>19</sub> H <sub>39</sub> N <sub>8</sub> P                             | [M – H] <sup>–</sup>       | –0.77                  |                          | 0.55            | 0.0506          |
| 439.21020  | 8604.357667 | 83                    | C <sub>20</sub> H <sub>24</sub> N <sub>6</sub> O <sub>2</sub>                | [M + Acetate] <sup>–</sup> | 0.62                   |                          | 0.23            | 0.5201          |
| 439.21020  | 8604.357667 | 83                    | C <sub>17</sub> H <sub>33</sub> O <sub>7</sub> P                             | [M + Acetate] <sup>–</sup> | –0.11                  |                          | 0.56            | 0.0902          |
| 439.21020  | 8604.357667 | 83                    | C <sub>12</sub> H <sub>30</sub> N <sub>8</sub> O <sub>2</sub> P <sub>2</sub> | [M + Acetate] <sup>–</sup> | –0.8                   |                          | 0.81            | 0.0047          |
| 439.21020  | 8604.357667 | 83                    | C <sub>13</sub> H <sub>24</sub> N <sub>12</sub> S                            | [M + Acetate] <sup>–</sup> | –0.94                  |                          | 0.93            | 0.0001          |
| 439.21020  | 8604.357667 | 83                    | C <sub>9</sub> H <sub>34</sub> N <sub>12</sub> O <sub>2</sub> P <sub>2</sub> | [M + Cl] <sup>–</sup>      | 1.15                   |                          | 0.02            | 0.9693          |
| 439.21020  | 8604.357667 | 83                    | C <sub>20</sub> H <sub>36</sub> O <sub>8</sub>                               | [M + Cl] <sup>–</sup>      | –0.5                   |                          | 0.23            | 0.5201          |
| 439.21020  | 8604.357667 | 83                    | C <sub>15</sub> H <sub>33</sub> N <sub>8</sub> O <sub>3</sub> P              | [M + Cl] <sup>–</sup>      | –1.2                   |                          | 0.86            | 0.0015          |
| 439.21020  | 8604.357667 | 83                    | C <sub>16</sub> H <sub>39</sub> N <sub>6</sub> P <sub>3</sub> S              | [M – H] <sup>–</sup>       | 1.13                   |                          | 0.72            | 0.0198          |
| 439.21020  | 8604.357667 | 83                    | C <sub>22</sub> H <sub>28</sub> N <sub>6</sub> O <sub>4</sub>                | [M – H] <sup>–</sup>       | 0.62                   |                          | 0.11            | 0.7518          |
| 439.21020  | 8604.357667 | 83                    | C <sub>30</sub> H <sub>32</sub> OS                                           | [M – H] <sup>–</sup>       | 0.2                    |                          | –0.05           | 0.8932          |
| 439.21020  | 8604.357667 | 83                    | C <sub>15</sub> H <sub>36</sub> N <sub>8</sub> OS <sub>3</sub>               | [M – H] <sup>–</sup>       | 0.12                   |                          | 0.86            | 0.0015          |
| 439.21020  | 8604.357667 | 83                    | C <sub>19</sub> H <sub>37</sub> O <sub>9</sub> P                             | [M – H] <sup>–</sup>       | –0.11                  |                          | 0.32            | 0.3723          |
| 439.21020  | 8604.357667 | 83                    | C <sub>14</sub> H <sub>34</sub> N <sub>8</sub> O <sub>4</sub> P <sub>2</sub> | [M – H] <sup>–</sup>       | –0.8                   |                          | 0.94            | 0.0000          |
| 439.21020  | 8604.357667 | 83                    | C <sub>15</sub> H <sub>28</sub> N <sub>12</sub> O <sub>2</sub> S             | [M – H] <sup>–</sup>       | –0.94                  |                          | 0.86            | 0.0015          |
| 439.21020  | 8604.357667 | 83                    | C <sub>22</sub> H <sub>38</sub> N <sub>2</sub> OP <sub>2</sub> S             | [M – H] <sup>–</sup>       | –1.22                  |                          | 0.11            | 0.7518          |
| 445.28076  | 122661.2567 | 84                    | C <sub>21</sub> H <sub>38</sub> O <sub>6</sub>                               | [M + Acetate] <sup>–</sup> | 0.15                   | [6-Deoxyerythronolide B] | –0.25           | 0.5154          |
| 445.28076  | 122661.2567 | 84                    | C <sub>16</sub> H <sub>35</sub> N <sub>8</sub> OP                            | [M + Acetate] <sup>–</sup> | –0.54                  |                          | 0.15            | 0.7056          |
| 445.28076  | 122661.2567 | 84                    | C <sub>13</sub> H <sub>39</sub> N <sub>12</sub> OP                           | [M + Cl] <sup>–</sup>      | 1.39                   |                          | 0.78            | 0.0124          |

Table S1. Cont.

| <i>m/z</i> | Intensity   | ID SIP<br>(Figure S5) | Empirical formula<br>(all- <sup>12</sup> C containing<br>peak)                              | Ion form                   | Mass<br>error<br>(ppm) | KEGG compound | <i>r</i> -value | <i>p</i> -value |
|------------|-------------|-----------------------|---------------------------------------------------------------------------------------------|----------------------------|------------------------|---------------|-----------------|-----------------|
| 445.28076  | 122661.2567 | 84                    | C <sub>19</sub> H <sub>38</sub> N <sub>8</sub> O <sub>2</sub>                               | [M + Cl] <sup>−</sup>      | −0.93                  |               | −0.16           | 0.6724          |
| 445.28076  | 122661.2567 | 84                    | C <sub>23</sub> H <sub>42</sub> O <sub>8</sub>                                              | [M − H] <sup>−</sup>       | 0.15                   |               | −0.30           | 0.4397          |
| 445.28076  | 122661.2567 | 84                    | C <sub>18</sub> H <sub>39</sub> N <sub>8</sub> O <sub>3</sub> P                             | [M − H] <sup>−</sup>       | −0.54                  |               | −0.09           | 0.8106          |
| 445.28076  | 122661.2567 | 84                    | C <sub>26</sub> H <sub>43</sub> N <sub>2</sub> P <sub>8</sub>                               | [M − H] <sup>−</sup>       | −0.95                  |               | −0.33           | 0.3885          |
| 441.28557  | 12578.83083 | 85                    | C <sub>22</sub> H <sub>38</sub> O <sub>5</sub>                                              | [M + Acetate] <sup>−</sup> | −0.47                  |               | 0.24            | 0.6961          |
| 441.28557  | 12578.83083 | 85                    | C <sub>17</sub> H <sub>35</sub> N <sub>8</sub> P                                            | [M + Acetate] <sup>−</sup> | −1.16                  |               | 0.71            | 0.1760          |
| 441.28557  | 12578.83083 | 85                    | C <sub>19</sub> H <sub>42</sub> N <sub>4</sub> O <sub>5</sub>                               | [M + Cl] <sup>−</sup>      | 1.47                   |               | 0.46            | 0.4342          |
| 441.28557  | 12578.83083 | 85                    | C <sub>14</sub> H <sub>39</sub> N <sub>12</sub> P                                           | [M + Cl] <sup>−</sup>      | 0.78                   |               | 0.99            | 0.0006          |
| 441.28557  | 12578.83083 | 85                    | C <sub>20</sub> H <sub>46</sub> N <sub>4</sub> S <sub>2</sub>                               | [M + Cl] <sup>−</sup>      | −0.5                   |               | 0.37            | 0.5396          |
| 441.28557  | 12578.83083 | 85                    | C <sub>13</sub> H <sub>40</sub> N <sub>12</sub> OP <sub>2</sub>                             | [M − H] <sup>−</sup>       | 1.17                   |               | 0.93            | 0.0236          |
| 441.28557  | 12578.83083 | 85                    | C <sub>24</sub> H <sub>42</sub> O <sub>7</sub>                                              | [M − H] <sup>−</sup>       | −0.47                  |               | 0.16            | 0.8007          |
| 441.28557  | 12578.83083 | 85                    | C <sub>19</sub> H <sub>39</sub> N <sub>8</sub> O <sub>2</sub> P                             | [M − H] <sup>−</sup>       | −1.16                  |               | 0.46            | 0.4342          |
| 441.24929  | 99110.558   | 86                    | C <sub>10</sub> H <sub>32</sub> N <sub>12</sub> P <sub>2</sub>                              | [M + Acetate] <sup>−</sup> | 1.41                   |               | −0.96           | 0.1717          |
| 441.24929  | 99110.558   | 86                    | C <sub>16</sub> H <sub>39</sub> N <sub>4</sub> P <sub>5</sub> S <sub>2</sub>                | [M + Acetate] <sup>−</sup> | 0.13                   |               | −0.47           | 0.2049          |
| 441.24929  | 99110.558   | 86                    | C <sub>21</sub> H <sub>34</sub> O <sub>6</sub>                                              | [M + Acetate] <sup>−</sup> | −0.23                  | [Sarcostin]   | 0.99            | 0.0000          |
| 441.24929  | 99110.558   | 86                    | C <sub>16</sub> H <sub>31</sub> N <sub>8</sub> OP                                           | [M + Acetate] <sup>−</sup> | −0.93                  |               | −0.47           | 0.2049          |
| 441.24929  | 99110.558   | 86                    | C <sub>13</sub> H <sub>35</sub> N <sub>12</sub> OP                                          | [M + Cl] <sup>−</sup>      | 1.01                   |               | −1.00           | 0.0000          |
| 441.24929  | 99110.558   | 86                    | C <sub>20</sub> H <sub>45</sub> N <sub>2</sub> P <sub>3</sub>                               | [M + Cl] <sup>−</sup>      | 0.74                   |               | 0.89            | 0.0001          |
| 441.24929  | 99110.558   | 86                    | C <sub>19</sub> H <sub>42</sub> N <sub>4</sub> O <sub>5</sub> S <sub>2</sub>                | [M + Cl] <sup>−</sup>      | −0.26                  |               | 0.72            | 0.0078          |
| 441.24929  | 99110.558   | 86                    | C <sub>19</sub> H <sub>34</sub> N <sub>8</sub> O <sub>2</sub>                               | [M + Cl] <sup>−</sup>      | −1.32                  |               | 0.72            | 0.0078          |
| 441.24929  | 99110.558   | 86                    | C <sub>12</sub> H <sub>36</sub> N <sub>12</sub> O <sub>2</sub> P <sub>2</sub>               | [M − H] <sup>−</sup>       | 1.41                   |               | −0.97           | 0.0070          |
| 441.24929  | 99110.558   | 86                    | C <sub>19</sub> H <sub>46</sub> N <sub>2</sub> OP <sub>4</sub>                              | [M − H] <sup>−</sup>       | 1.14                   |               | 0.72            | 0.0078          |
| 441.24929  | 99110.558   | 86                    | C <sub>18</sub> H <sub>43</sub> N <sub>4</sub> O <sub>2</sub> P <sub>5</sub> S <sub>2</sub> | [M − H] <sup>−</sup>       | 0.13                   |               | 0.43            | 0.1924          |

Table S1. Cont.

| <i>m/z</i> | Intensity   | ID SIP<br>(Figure S5) | Empirical formula<br>(all- <sup>12</sup> C containing<br>peak)               | Ion form                   | Mass<br>error<br>(ppm) | KEGG compound                                    | <i>r</i> -value | <i>p</i> -value |
|------------|-------------|-----------------------|------------------------------------------------------------------------------|----------------------------|------------------------|--------------------------------------------------|-----------------|-----------------|
| 441.24929  | 99110.558   | 86                    | C <sub>23</sub> H <sub>38</sub> O <sub>8</sub>                               | [M - H] <sup>-</sup>       | -0.23                  |                                                  | 0.90            | 0.0001          |
| 441.24929  | 99110.558   | 86                    | C <sub>18</sub> H <sub>35</sub> N <sub>8</sub> O <sub>3</sub> P              | [M - H] <sup>-</sup>       | -0.93                  |                                                  | 0.43            | 0.1924          |
| 441.24929  | 99110.558   | 86                    | C <sub>26</sub> H <sub>39</sub> N <sub>2</sub> PS                            | [M - H] <sup>-</sup>       | -1.34                  |                                                  | 0.27            | 0.4043          |
| 437.29118  | 21714.87667 | 87                    | C <sub>23</sub> H <sub>38</sub> O <sub>4</sub>                               | [M + Acetate] <sup>-</sup> | 0.72                   | [1-Arachidonoylglycerol, 2-Arachidonoylglycerol] | 0.87            | 0.0053          |
| 437.29118  | 21714.87667 | 87                    | C <sub>16</sub> H <sub>38</sub> N <sub>6</sub> O <sub>2</sub> S              | [M + Acetate] <sup>-</sup> | -0.85                  |                                                  | -0.66           | 0.1051          |
| 437.29118  | 21714.87667 | 87                    | C <sub>21</sub> H <sub>38</sub> N <sub>8</sub>                               | [M + Cl] <sup>-</sup>      | -0.37                  |                                                  | 0.75            | 0.0316          |
| 437.29118  | 21714.87667 | 87                    | C <sub>20</sub> H <sub>47</sub> N <sub>4</sub> PS <sub>2</sub>               | [M - H] <sup>-</sup>       | 1.09                   |                                                  | 0.51            | 0.1990          |
| 437.29118  | 21714.87667 | 87                    | C <sub>25</sub> H <sub>42</sub> O <sub>6</sub>                               | [M - H] <sup>-</sup>       | 0.72                   |                                                  | 0.45            | 0.2628          |
| 437.29118  | 21714.87667 | 87                    | C <sub>20</sub> H <sub>39</sub> N <sub>8</sub> OP                            | [M - H] <sup>-</sup>       | 0.03                   |                                                  | 0.51            | 0.1990          |
| 437.29118  | 21714.87667 | 87                    | C <sub>18</sub> H <sub>42</sub> N <sub>6</sub> O <sub>4</sub> S              | [M - H] <sup>-</sup>       | -0.85                  |                                                  | 0.04            | 0.9240          |
| 437.29118  | 21714.87667 | 87                    | C <sub>26</sub> H <sub>46</sub> OS <sub>2</sub>                              | [M - H] <sup>-</sup>       | -1.26                  |                                                  | 0.26            | 0.5401          |
| 441.32194  | 13986.06367 | 88                    | C <sub>23</sub> H <sub>42</sub> O <sub>4</sub>                               | [M + Acetate] <sup>-</sup> | -0.51                  |                                                  | 0.95            | 0.0009          |
| 441.32194  | 13986.06367 | 88                    | C <sub>20</sub> H <sub>46</sub> N <sub>4</sub> O <sub>4</sub>                | [M + Cl] <sup>-</sup>      | 1.43                   |                                                  | 0.76            | 0.0470          |
| 441.32194  | 13986.06367 | 88                    | C <sub>14</sub> H <sub>44</sub> N <sub>12</sub> P <sub>2</sub>               | [M - H] <sup>-</sup>       | 1.14                   |                                                  | 0.00            | 1.0000          |
| 441.32194  | 13986.06367 | 88                    | C <sub>25</sub> H <sub>46</sub> O <sub>6</sub>                               | [M - H] <sup>-</sup>       | -0.51                  |                                                  | 0.89            | 0.0079          |
| 441.32194  | 13986.06367 | 88                    | C <sub>20</sub> H <sub>43</sub> N <sub>8</sub> OP                            | [M - H] <sup>-</sup>       | -1.2                   |                                                  | 0.76            | 0.0470          |
| 449.23909  | 11970.7975  | 89                    | C <sub>8</sub> H <sub>32</sub> N <sub>12</sub> O <sub>2</sub> P <sub>2</sub> | [M + Acetate] <sup>-</sup> | 1.32                   |                                                  | -0.85           | 0.3511          |
| 449.23909  | 11970.7975  | 89                    | C <sub>19</sub> H <sub>34</sub> O <sub>8</sub>                               | [M + Acetate] <sup>-</sup> | -0.3                   | [Rehmaionoside A, Rehmaionoside B]               | -0.22           | 0.6723          |
| 449.23909  | 11970.7975  | 89                    | C <sub>14</sub> H <sub>31</sub> N <sub>8</sub> O <sub>3</sub> P              | [M + Acetate] <sup>-</sup> | -0.98                  |                                                  | 0.67            | 0.1422          |
| 449.23909  | 11970.7975  | 89                    | C <sub>22</sub> H <sub>35</sub> N <sub>2</sub> PS                            | [M + Acetate] <sup>-</sup> | -1.38                  |                                                  | -0.35           | 0.5000          |
| 449.23909  | 11970.7975  | 89                    | C <sub>11</sub> H <sub>35</sub> N <sub>12</sub> O <sub>3</sub> P             | [M + Cl] <sup>-</sup>      | 0.93                   |                                                  | 0.33            | 0.5192          |
| 449.23909  | 11970.7975  | 89                    | C <sub>19</sub> H <sub>39</sub> N <sub>6</sub> PS                            | [M + Cl] <sup>-</sup>      | 0.52                   |                                                  | -0.22           | 0.6723          |
| 449.23909  | 11970.7975  | 89                    | C <sub>17</sub> H <sub>34</sub> N <sub>8</sub> O <sub>4</sub>                | [M + Cl] <sup>-</sup>      | -1.37                  |                                                  | -0.03           | 0.9520          |



Table S1. Cont.

| <i>m/z</i> | Intensity   | ID SIP<br>(Figure S5) | Empirical formula<br>(all- <sup>12</sup> C containing<br>peak)                | Ion form                   | Mass<br>error<br>(ppm) | KEGG compound      | <i>r</i> -value | <i>p</i> -value |
|------------|-------------|-----------------------|-------------------------------------------------------------------------------|----------------------------|------------------------|--------------------|-----------------|-----------------|
| 449.23909  | 11970.7975  | 89                    | C <sub>10</sub> H <sub>36</sub> N <sub>12</sub> O <sub>4</sub> P <sub>2</sub> | [M – H] <sup>–</sup>       | 1.32                   |                    | –0.21           | 0.7355          |
| 449.23909  | 11970.7975  | 89                    | C <sub>18</sub> H <sub>40</sub> N <sub>6</sub> OP <sub>2</sub> S              | [M – H] <sup>–</sup>       | 0.91                   |                    | –0.14           | 0.7843          |
| 449.23909  | 11970.7975  | 89                    | C <sub>19</sub> H <sub>26</sub> N <sub>14</sub>                               | [M – H] <sup>–</sup>       | –0.27                  |                    | –0.22           | 0.6723          |
| 449.23909  | 11970.7975  | 89                    | C <sub>21</sub> H <sub>38</sub> O <sub>10</sub>                               | [M – H] <sup>–</sup>       | –0.3                   |                    | –0.32           | 0.5401          |
| 449.23909  | 11970.7975  | 89                    | C <sub>16</sub> H <sub>35</sub> N <sub>8</sub> O <sub>5</sub> P               | [M – H] <sup>–</sup>       | –0.98                  |                    | 0.14            | 0.7940          |
| 449.23909  | 11970.7975  | 89                    | C <sub>24</sub> H <sub>39</sub> N <sub>2</sub> O <sub>2</sub> PS              | [M – H] <sup>–</sup>       | –1.38                  |                    | –0.39           | 0.4469          |
| 457.35308  | 13969.922   | 90                    | C <sub>24</sub> H <sub>46</sub> O <sub>4</sub>                                | [M + Acetate] <sup>–</sup> | –0.84                  | [Lauroyl peroxide] | 0.77            | 0.0250          |
| 457.35308  | 13969.922   | 90                    | C <sub>26</sub> H <sub>50</sub> O <sub>6</sub>                                | [M – H] <sup>–</sup>       | –0.84                  |                    | 0.73            | 0.0391          |
| 447.21516  | 25773.18367 | 91                    | C <sub>22</sub> H <sub>32</sub> N <sub>2</sub> S <sub>2</sub>                 | [M + Acetate] <sup>–</sup> | 1.37                   |                    | 0.90            | 0.0003          |
| 447.21516  | 25773.18367 | 91                    | C <sub>8</sub> H <sub>31</sub> N <sub>12</sub> P <sub>3</sub>                 | [M + Acetate] <sup>–</sup> | 1.24                   |                    | 0.00            | 1.0000          |
| 447.21516  | 25773.18367 | 91                    | C <sub>22</sub> H <sub>24</sub> N <sub>6</sub> O                              | [M + Acetate] <sup>–</sup> | 0.33                   |                    | 0.90            | 0.0003          |
| 447.21516  | 25773.18367 | 91                    | C <sub>7</sub> H <sub>28</sub> N <sub>14</sub> OS <sub>2</sub>                | [M + Acetate] <sup>–</sup> | 0.25                   |                    | 0.00            | 1.0000          |
| 447.21516  | 25773.18367 | 91                    | C <sub>19</sub> H <sub>33</sub> O <sub>6</sub> P                              | [M + Acetate] <sup>–</sup> | –0.38                  |                    | 0.82            | 0.0038          |
| 447.21516  | 25773.18367 | 91                    | C <sub>14</sub> H <sub>30</sub> N <sub>8</sub> OP <sub>2</sub>                | [M + Acetate] <sup>–</sup> | –1.07                  |                    | –0.76           | 0.0291          |
| 447.21516  | 25773.18367 | 91                    | C <sub>11</sub> H <sub>34</sub> N <sub>12</sub> OP <sub>2</sub>               | [M + Cl] <sup>–</sup>      | 0.85                   |                    | –0.97           | 0.0051          |
| 447.21516  | 25773.18367 | 91                    | C <sub>18</sub> H <sub>44</sub> N <sub>2</sub> P <sub>4</sub>                 | [M + Cl] <sup>–</sup>      | 0.58                   |                    | 0.57            | 0.0838          |
| 447.21516  | 25773.18367 | 91                    | C <sub>17</sub> H <sub>41</sub> N <sub>4</sub> OPS <sub>2</sub>               | [M + Cl] <sup>–</sup>      | –0.41                  |                    | 0.27            | 0.4583          |
| 447.21516  | 25773.18367 | 91                    | C <sub>22</sub> H <sub>36</sub> O <sub>7</sub>                                | [M + Cl] <sup>–</sup>      | –0.78                  | [Grayanotoxin I]   | 0.90            | 0.0003          |
| 447.21516  | 25773.18367 | 91                    | C <sub>17</sub> H <sub>33</sub> N <sub>8</sub> O <sub>2</sub> P               | [M + Cl] <sup>–</sup>      | –1.46                  |                    | 0.27            | 0.4583          |
| 447.21516  | 25773.18367 | 91                    | C <sub>24</sub> H <sub>36</sub> N <sub>2</sub> O <sub>2</sub> S <sub>2</sub>  | [M – H] <sup>–</sup>       | 1.37                   |                    | 0.65            | 0.0436          |
| 447.21516  | 25773.18367 | 91                    | C <sub>10</sub> H <sub>35</sub> N <sub>12</sub> O <sub>2</sub> P <sub>3</sub> | [M – H] <sup>–</sup>       | 1.24                   |                    | –0.99           | 0.0058          |
| 447.21516  | 25773.18367 | 91                    | C <sub>24</sub> H <sub>28</sub> N <sub>6</sub> O <sub>3</sub>                 | [M – H] <sup>–</sup>       | 0.33                   |                    | 0.65            | 0.0436          |
| 447.21516  | 25773.18367 | 91                    | C <sub>9</sub> H <sub>32</sub> N <sub>14</sub> O <sub>3</sub> S <sub>2</sub>  | [M – H] <sup>–</sup>       | 0.25                   |                    | –0.96           | 0.1858          |

Table S1. Cont.

| <i>m/z</i> | Intensity   | ID SIP<br>(Figure S5) | Empirical formula<br>(all- <sup>12</sup> C containing<br>peak)                | Ion form                   | Mass<br>error<br>(ppm) | KEGG compound | <i>r</i> -value | <i>p</i> -value |
|------------|-------------|-----------------------|-------------------------------------------------------------------------------|----------------------------|------------------------|---------------|-----------------|-----------------|
| 447.21516  | 25773.18367 | 91                    | C <sub>32</sub> H <sub>32</sub> S                                             | [M - H] <sup>-</sup>       | -0.08                  |               | 0.07            | 0.8582          |
| 447.21516  | 25773.18367 | 91                    | C <sub>17</sub> H <sub>36</sub> N <sub>8</sub> S <sub>3</sub>                 | [M - H] <sup>-</sup>       | -0.16                  |               | 0.27            | 0.4583          |
| 447.21516  | 25773.18367 | 91                    | C <sub>21</sub> H <sub>37</sub> O <sub>8</sub> P                              | [M - H] <sup>-</sup>       | -0.38                  |               | 0.98            | 0.0000          |
| 447.21516  | 25773.18367 | 91                    | C <sub>16</sub> H <sub>34</sub> N <sub>8</sub> O <sub>3</sub> P <sub>2</sub>  | [M - H] <sup>-</sup>       | -1.07                  |               | -0.05           | 0.8820          |
| 447.21516  | 25773.18367 | 91                    | C <sub>17</sub> H <sub>28</sub> N <sub>12</sub> OS                            | [M - H] <sup>-</sup>       | -1.2                   |               | 0.27            | 0.4583          |
| 447.21516  | 25773.18367 | 91                    | C <sub>24</sub> H <sub>38</sub> N <sub>2</sub> P <sub>2</sub> S               | [M - H] <sup>-</sup>       | -1.47                  |               | 0.65            | 0.0436          |
| 451.21017  | 9646.401333 | 92                    | C <sub>7</sub> H <sub>31</sub> N <sub>12</sub> OP <sub>3</sub>                | [M + Acetate] <sup>-</sup> | 1.44                   |               | 0.00            | 1.0000          |
| 451.21017  | 9646.401333 | 92                    | C <sub>21</sub> H <sub>24</sub> N <sub>6</sub> O <sub>2</sub>                 | [M + Acetate] <sup>-</sup> | 0.54                   |               | 0.76            | 0.0297          |
| 451.21017  | 9646.401333 | 92                    | C <sub>6</sub> H <sub>28</sub> N <sub>14</sub> O <sub>2</sub> S <sub>2</sub>  | [M + Acetate] <sup>-</sup> | 0.46                   |               | 0.00            | 1.0000          |
| 451.21017  | 9646.401333 | 92                    | C <sub>18</sub> H <sub>33</sub> O <sub>7</sub> P                              | [M + Acetate] <sup>-</sup> | -0.17                  |               | -0.24           | 0.5708          |
| 451.21017  | 9646.401333 | 92                    | C <sub>13</sub> H <sub>30</sub> N <sub>8</sub> O <sub>2</sub> P <sub>2</sub>  | [M + Acetate] <sup>-</sup> | -0.85                  |               | -0.90           | 0.0150          |
| 451.21017  | 9646.401333 | 92                    | C <sub>14</sub> H <sub>24</sub> N <sub>12</sub> S                             | [M + Acetate] <sup>-</sup> | -0.98                  |               | -0.90           | 0.0061          |
| 451.21017  | 9646.401333 | 92                    | C <sub>10</sub> H <sub>34</sub> N <sub>12</sub> O <sub>2</sub> P <sub>2</sub> | [M + Cl] <sup>-</sup>      | 1.05                   |               | 0.08            | 0.9473          |
| 451.21017  | 9646.401333 | 92                    | C <sub>21</sub> H <sub>36</sub> O <sub>8</sub>                                | [M + Cl] <sup>-</sup>      | -0.56                  |               | 0.76            | 0.0297          |
| 451.21017  | 9646.401333 | 92                    | C <sub>16</sub> H <sub>33</sub> N <sub>8</sub> O <sub>3</sub> P               | [M + Cl] <sup>-</sup>      | -1.23                  |               | -0.78           | 0.0228          |
| 451.21017  | 9646.401333 | 92                    | C <sub>9</sub> H <sub>35</sub> N <sub>12</sub> O <sub>3</sub> P <sub>3</sub>  | [M - H] <sup>-</sup>       | 1.44                   |               | 0.00            | 1.0000          |
| 451.21017  | 9646.401333 | 92                    | C <sub>17</sub> H <sub>39</sub> N <sub>6</sub> P <sub>3</sub> S               | [M - H] <sup>-</sup>       | 1.03                   |               | -0.57           | 0.1415          |
| 451.21017  | 9646.401333 | 92                    | C <sub>23</sub> H <sub>28</sub> N <sub>6</sub> O <sub>4</sub>                 | [M - H] <sup>-</sup>       | 0.54                   |               | 0.88            | 0.0040          |
| 451.21017  | 9646.401333 | 92                    | C <sub>8</sub> H <sub>32</sub> N <sub>14</sub> O <sub>4</sub> S <sub>2</sub>  | [M - H] <sup>-</sup>       | 0.46                   |               | 0.00            | 1.0000          |
| 451.21017  | 9646.401333 | 92                    | C <sub>31</sub> H <sub>32</sub> OS                                            | [M - H] <sup>-</sup>       | 0.13                   |               | 0.73            | 0.0398          |
| 451.21017  | 9646.401333 | 92                    | C <sub>16</sub> H <sub>36</sub> N <sub>8</sub> OS <sub>3</sub>                | [M - H] <sup>-</sup>       | 0.05                   |               | -0.78           | 0.0228          |
| 451.21017  | 9646.401333 | 92                    | C <sub>20</sub> H <sub>37</sub> O <sub>9</sub> P                              | [M - H] <sup>-</sup>       | -0.17                  |               | 0.54            | 0.1690          |
| 451.21017  | 9646.401333 | 92                    | C <sub>15</sub> H <sub>34</sub> N <sub>8</sub> O <sub>4</sub> P <sub>2</sub>  | [M - H] <sup>-</sup>       | -0.85                  |               | -0.89           | 0.0034          |

Table S1. Cont.

| <i>m/z</i> | Intensity   | ID SIP<br>(Figure S5) | Empirical formula<br>(all- <sup>12</sup> C containing<br>peak)                | Ion form                   | Mass<br>error<br>(ppm) | KEGG compound     | <i>r</i> -value | <i>p</i> -value |
|------------|-------------|-----------------------|-------------------------------------------------------------------------------|----------------------------|------------------------|-------------------|-----------------|-----------------|
| 451.21017  | 9646.401333 | 92                    | C <sub>16</sub> H <sub>28</sub> N <sub>12</sub> O <sub>2</sub> S              | [M – H] <sup>–</sup>       | –0.98                  |                   | –0.78           | 0.0228          |
| 451.21017  | 9646.401333 | 92                    | C <sub>23</sub> H <sub>38</sub> N <sub>2</sub> OP <sub>2</sub> S              | [M – H] <sup>–</sup>       | –1.25                  |                   | 0.88            | 0.0040          |
| 453.24925  | 49409.43667 | 93                    | C <sub>11</sub> H <sub>32</sub> N <sub>12</sub> P <sub>2</sub>                | [M + Acetate] <sup>–</sup> | 1.28                   |                   | –0.56           | 0.4411          |
| 453.24925  | 49409.43667 | 93                    | C <sub>17</sub> H <sub>39</sub> N <sub>4</sub> PS <sub>2</sub>                | [M + Acetate] <sup>–</sup> | 0.04                   |                   | –0.40           | 0.2529          |
| 453.24925  | 49409.43667 | 93                    | C <sub>22</sub> H <sub>34</sub> O <sub>6</sub>                                | [M + Acetate] <sup>–</sup> | –0.32                  |                   | 0.74            | 0.0062          |
| 453.24925  | 49409.43667 | 93                    | C <sub>17</sub> H <sub>31</sub> N <sub>8</sub> OP                             | [M + Acetate] <sup>–</sup> | –0.99                  |                   | –0.40           | 0.2529          |
| 453.24925  | 49409.43667 | 93                    | C <sub>14</sub> H <sub>35</sub> N <sub>12</sub> OP                            | [M + Cl] <sup>–</sup>      | 0.9                    |                   | –0.63           | 0.1302          |
| 453.24925  | 49409.43667 | 93                    | C <sub>21</sub> H <sub>45</sub> N <sub>2</sub> P <sub>3</sub>                 | [M + Cl] <sup>–</sup>      | 0.63                   |                   | 0.55            | 0.0619          |
| 453.24925  | 49409.43667 | 93                    | C <sub>20</sub> H <sub>42</sub> N <sub>4</sub> OS <sub>2</sub>                | [M + Cl] <sup>–</sup>      | –0.35                  |                   | 0.34            | 0.2724          |
| 453.24925  | 49409.43667 | 93                    | C <sub>20</sub> H <sub>34</sub> N <sub>8</sub> O <sub>2</sub>                 | [M + Cl] <sup>–</sup>      | –1.38                  |                   | 0.34            | 0.2724          |
| 453.24925  | 49409.43667 | 93                    | C <sub>13</sub> H <sub>36</sub> N <sub>12</sub> O <sub>2</sub> P <sub>2</sub> | [M – H] <sup>–</sup>       | 1.28                   |                   | –0.64           | 0.1737          |
| 453.24925  | 49409.43667 | 93                    | C <sub>20</sub> H <sub>46</sub> N <sub>2</sub> OP <sub>4</sub>                | [M – H] <sup>–</sup>       | 1.02                   |                   | 0.34            | 0.2724          |
| 453.24925  | 49409.43667 | 93                    | C <sub>19</sub> H <sub>43</sub> N <sub>4</sub> O <sub>2</sub> PS <sub>2</sub> | [M – H] <sup>–</sup>       | 0.04                   |                   | 0.12            | 0.7006          |
| 453.24925  | 49409.43667 | 93                    | C <sub>24</sub> H <sub>38</sub> O <sub>8</sub>                                | [M – H] <sup>–</sup>       | –0.32                  | [Rhodojaponin IV] | 0.96            | 0.0000          |
| 453.24925  | 49409.43667 | 93                    | C <sub>19</sub> H <sub>35</sub> N <sub>8</sub> O <sub>3</sub> P               | [M – H] <sup>–</sup>       | –0.99                  |                   | 0.12            | 0.7006          |
| 453.24925  | 49409.43667 | 93                    | C <sub>27</sub> H <sub>39</sub> N <sub>2</sub> PS                             | [M – H] <sup>–</sup>       | –1.39                  |                   | 0.82            | 0.0011          |
| 461.27604  | 11097.01975 | 94                    | C <sub>21</sub> H <sub>38</sub> O <sub>7</sub>                                | [M + Acetate] <sup>–</sup> | 0.94                   | [Erythronolide B] | –0.52           | 0.1536          |
| 461.27604  | 11097.01975 | 94                    | C <sub>16</sub> H <sub>35</sub> N <sub>8</sub> O <sub>2</sub> P               | [M + Acetate] <sup>–</sup> | 0.27                   |                   | –0.13           | 0.7446          |
| 461.27604  | 11097.01975 | 94                    | C <sub>22</sub> H <sub>42</sub> O <sub>2</sub> S <sub>2</sub>                 | [M + Acetate] <sup>–</sup> | –0.95                  |                   | –0.54           | 0.1337          |
| 461.27604  | 11097.01975 | 94                    | C <sub>9</sub> H <sub>35</sub> N <sub>14</sub> PS                             | [M + Acetate] <sup>–</sup> | –1.21                  |                   | 0.52            | 0.2340          |
| 461.27604  | 11097.01975 | 94                    | C <sub>19</sub> H <sub>38</sub> N <sub>8</sub> O <sub>3</sub>                 | [M + Cl] <sup>–</sup>      | –0.11                  |                   | –0.44           | 0.2364          |
| 461.27604  | 11097.01975 | 94                    | C <sub>27</sub> H <sub>42</sub> N <sub>2</sub> S                              | [M + Cl] <sup>–</sup>      | –0.5                   |                   | –0.58           | 0.0998          |
| 461.27604  | 11097.01975 | 94                    | C <sub>23</sub> H <sub>42</sub> O <sub>9</sub>                                | [M – H] <sup>–</sup>       | 0.94                   |                   | –0.56           | 0.1208          |

Table S1. Cont.

| <i>m/z</i> | Intensity   | ID SIP<br>(Figure S5) | Empirical formula<br>(all- <sup>12</sup> C containing<br>peak)                | Ion form                   | Mass<br>error<br>(ppm) | KEGG compound      | <i>r</i> -value | <i>p</i> -value |
|------------|-------------|-----------------------|-------------------------------------------------------------------------------|----------------------------|------------------------|--------------------|-----------------|-----------------|
| 461.27604  | 11097.01975 | 94                    | C <sub>18</sub> H <sub>39</sub> N <sub>8</sub> O <sub>4</sub> P               | [M – H] <sup>–</sup>       | 0.27                   |                    | –0.37           | 0.3242          |
| 461.27604  | 11097.01975 | 94                    | C <sub>26</sub> H <sub>43</sub> N <sub>2</sub> OPS                            | [M – H] <sup>–</sup>       | –0.12                  |                    | –0.58           | 0.1024          |
| 461.27604  | 11097.01975 | 94                    | C <sub>24</sub> H <sub>46</sub> O <sub>4</sub> S <sub>2</sub>                 | [M – H] <sup>–</sup>       | –0.95                  |                    | –0.57           | 0.1121          |
| 461.27604  | 11097.01975 | 94                    | C <sub>11</sub> H <sub>39</sub> N <sub>14</sub> O <sub>2</sub> PS             | [M – H] <sup>–</sup>       | –1.21                  |                    | 0.95            | 0.0001          |
| 457.35308  | 13969.922   | 95                    | C <sub>24</sub> H <sub>46</sub> O <sub>4</sub>                                | [M + Acetate] <sup>–</sup> | –0.84                  | [Lauroyl peroxide] | 0.77            | 0.0250          |
| 457.35308  | 13969.922   | 95                    | C <sub>26</sub> H <sub>50</sub> O <sub>6</sub>                                | [M – H] <sup>–</sup>       | –0.84                  |                    | 0.73            | 0.0391          |
| 457.24425  | 27036.51833 | 96                    | C <sub>10</sub> H <sub>32</sub> N <sub>12</sub> OP <sub>2</sub>               | [M + Acetate] <sup>–</sup> | 1.46                   |                    | 0.00            | 1.0000          |
| 457.24425  | 27036.51833 | 96                    | C <sub>17</sub> H <sub>42</sub> N <sub>2</sub> P <sub>4</sub>                 | [M + Acetate] <sup>–</sup> | 1.19                   |                    | 0.29            | 0.4500          |
| 457.24425  | 27036.51833 | 96                    | C <sub>16</sub> H <sub>39</sub> N <sub>4</sub> OPS <sub>2</sub>               | [M + Acetate] <sup>–</sup> | 0.23                   |                    | –0.17           | 0.6947          |
| 457.24425  | 27036.51833 | 96                    | C <sub>21</sub> H <sub>34</sub> O <sub>7</sub>                                | [M + Acetate] <sup>–</sup> | –0.13                  |                    | 0.98            | 0.0000          |
| 457.24425  | 27036.51833 | 96                    | C <sub>16</sub> H <sub>31</sub> N <sub>8</sub> O <sub>2</sub> P               | [M + Acetate] <sup>–</sup> | –0.8                   |                    | –0.17           | 0.6947          |
| 457.24425  | 27036.51833 | 96                    | C <sub>13</sub> H <sub>35</sub> N <sub>12</sub> O <sub>2</sub> P              | [M + Cl] <sup>–</sup>      | 1.08                   |                    | –0.97           | 0.0071          |
| 457.24425  | 27036.51833 | 96                    | C <sub>20</sub> H <sub>45</sub> N <sub>2</sub> OP <sub>3</sub>                | [M + Cl] <sup>–</sup>      | 0.81                   |                    | 0.93            | 0.0003          |
| 457.24425  | 27036.51833 | 96                    | C <sub>19</sub> H <sub>42</sub> N <sub>4</sub> O <sub>2</sub> S <sub>2</sub>  | [M + Cl] <sup>–</sup>      | –0.16                  |                    | 0.76            | 0.0177          |
| 457.24425  | 27036.51833 | 96                    | C <sub>19</sub> H <sub>34</sub> N <sub>8</sub> O <sub>3</sub>                 | [M + Cl] <sup>–</sup>      | –1.18                  |                    | 0.76            | 0.0177          |
| 457.24425  | 27036.51833 | 96                    | C <sub>12</sub> H <sub>36</sub> N <sub>12</sub> O <sub>3</sub> P <sub>2</sub> | [M – H] <sup>–</sup>       | 1.46                   |                    | –0.92           | 0.0806          |
| 457.24425  | 27036.51833 | 96                    | C <sub>19</sub> H <sub>46</sub> N <sub>2</sub> O <sub>2</sub> P <sub>4</sub>  | [M – H] <sup>–</sup>       | 1.19                   |                    | 0.76            | 0.0177          |
| 457.24425  | 27036.51833 | 96                    | C <sub>20</sub> H <sub>40</sub> N <sub>6</sub> P <sub>2</sub> S               | [M – H] <sup>–</sup>       | 1.06                   |                    | 0.93            | 0.0003          |
| 457.24425  | 27036.51833 | 96                    | C <sub>18</sub> H <sub>43</sub> N <sub>4</sub> O <sub>3</sub> PS <sub>2</sub> | [M – H] <sup>–</sup>       | 0.23                   |                    | 0.53            | 0.1419          |
| 457.24425  | 27036.51833 | 96                    | C <sub>23</sub> H <sub>38</sub> O <sub>9</sub>                                | [M – H] <sup>–</sup>       | –0.13                  |                    | 0.62            | 0.0723          |
| 457.24425  | 27036.51833 | 96                    | C <sub>18</sub> H <sub>35</sub> N <sub>8</sub> O <sub>4</sub> P               | [M – H] <sup>–</sup>       | –0.8                   |                    | 0.53            | 0.1419          |
| 457.24425  | 27036.51833 | 96                    | C <sub>26</sub> H <sub>39</sub> N <sub>2</sub> OPS                            | [M – H] <sup>–</sup>       | –1.2                   |                    | –0.08           | 0.8342          |
| 455.26517  | 105234.545  | 97                    | C <sub>17</sub> H <sub>41</sub> N <sub>4</sub> PS <sub>2</sub>                | [M + Acetate] <sup>–</sup> | 0.63                   |                    | –0.27           | 0.5159          |

Table S1. Cont.

| <i>m/z</i> | Intensity  | ID SIP<br>(Figure S5) | Empirical formula<br>(all- <sup>12</sup> C containing<br>peak)                | Ion form                   | Mass<br>error<br>(ppm) | KEGG compound | <i>r</i> -value | <i>p</i> -value |
|------------|------------|-----------------------|-------------------------------------------------------------------------------|----------------------------|------------------------|---------------|-----------------|-----------------|
| 455.26517  | 105234.545 | 97                    | C <sub>22</sub> H <sub>36</sub> O <sub>6</sub>                                | [M + Acetate] <sup>−</sup> | 0.28                   |               | 0.66            | 0.0771          |
| 455.26517  | 105234.545 | 97                    | C <sub>17</sub> H <sub>33</sub> N <sub>8</sub> OP                             | [M + Acetate] <sup>−</sup> | −0.39                  |               | −0.27           | 0.5159          |
| 455.26517  | 105234.545 | 97                    | C <sub>15</sub> H <sub>36</sub> N <sub>6</sub> O <sub>4</sub> S               | [M + Acetate] <sup>−</sup> | −1.23                  |               | −0.51           | 0.2982          |
| 455.26517  | 105234.545 | 97                    | C <sub>14</sub> H <sub>37</sub> N <sub>12</sub> OP                            | [M + Cl] <sup>−</sup>      | 1.49                   |               | −0.73           | 0.1577          |
| 455.26517  | 105234.545 | 97                    | C <sub>21</sub> H <sub>47</sub> N <sub>2</sub> P <sub>3</sub>                 | [M + Cl] <sup>−</sup>      | 1.22                   |               | 0.42            | 0.3010          |
| 455.26517  | 105234.545 | 97                    | C <sub>20</sub> H <sub>44</sub> N <sub>4</sub> OS <sub>2</sub>                | [M + Cl] <sup>−</sup>      | 0.25                   |               | 0.20            | 0.6387          |
| 455.26517  | 105234.545 | 97                    | C <sub>20</sub> H <sub>36</sub> N <sub>8</sub> O <sub>2</sub>                 | [M + Cl] <sup>−</sup>      | −0.78                  |               | 0.20            | 0.6387          |
| 455.26517  | 105234.545 | 97                    | C <sub>19</sub> H <sub>45</sub> N <sub>4</sub> O <sub>2</sub> PS <sub>2</sub> | [M − H] <sup>−</sup>       | 0.63                   |               | 0.01            | 0.9768          |
| 455.26517  | 105234.545 | 97                    | C <sub>24</sub> H <sub>40</sub> O <sub>8</sub>                                | [M − H] <sup>−</sup>       | 0.28                   |               | 0.96            | 0.0002          |
| 455.26517  | 105234.545 | 97                    | C <sub>19</sub> H <sub>37</sub> N <sub>8</sub> O <sub>3</sub> P               | [M − H] <sup>−</sup>       | −0.39                  |               | 0.01            | 0.9768          |
| 455.26517  | 105234.545 | 97                    | C <sub>27</sub> H <sub>41</sub> N <sub>2</sub> PS                             | [M − H] <sup>−</sup>       | −0.79                  |               | 0.84            | 0.0084          |
| 455.26517  | 105234.545 | 97                    | C <sub>17</sub> H <sub>40</sub> N <sub>6</sub> O <sub>6</sub> S               | [M − H] <sup>−</sup>       | −1.23                  |               | −0.27           | 0.5159          |
| 463.15180  | 14650.97   | 98                    | C <sub>8</sub> H <sub>24</sub> N <sub>10</sub> O <sub>5</sub> S <sub>2</sub>  | [M + Acetate] <sup>−</sup> | 1.48                   |               | 0.00            | 1.0000          |
| 463.15180  | 14650.97   | 98                    | C <sub>15</sub> H <sub>34</sub> O <sub>4</sub> P <sub>2</sub> S <sub>2</sub>  | [M + Acetate] <sup>−</sup> | 1.22                   |               | −0.30           | 0.4727          |
| 463.15180  | 14650.97   | 98                    | C <sub>16</sub> H <sub>28</sub> N <sub>4</sub> O <sub>2</sub> S <sub>3</sub>  | [M + Acetate] <sup>−</sup> | 1.09                   |               | 0.23            | 0.5589          |
| 463.15180  | 14650.97   | 98                    | C <sub>18</sub> H <sub>17</sub> N <sub>10</sub> P                             | [M + Acetate] <sup>−</sup> | 0.9                    |               | 0.74            | 0.0232          |
| 463.15180  | 14650.97   | 98                    | C <sub>8</sub> H <sub>16</sub> N <sub>14</sub> O <sub>6</sub>                 | [M + Acetate] <sup>−</sup> | 0.48                   |               | 0.00            | 1.0000          |
| 463.15180  | 14650.97   | 98                    | C <sub>15</sub> H <sub>26</sub> N <sub>4</sub> O <sub>5</sub> P <sub>2</sub>  | [M + Acetate] <sup>−</sup> | 0.21                   |               | −0.30           | 0.4727          |
| 463.15180  | 14650.97   | 98                    | C <sub>16</sub> H <sub>20</sub> N <sub>8</sub> O <sub>3</sub> S               | [M + Acetate] <sup>−</sup> | 0.08                   |               | 0.23            | 0.5589          |
| 463.15180  | 14650.97   | 98                    | C <sub>24</sub> H <sub>24</sub> N <sub>2</sub> S <sub>2</sub>                 | [M + Acetate] <sup>−</sup> | −0.31                  |               | 0.13            | 0.7335          |
| 463.15180  | 14650.97   | 98                    | C <sub>9</sub> H <sub>28</sub> N <sub>10</sub> S <sub>4</sub>                 | [M + Acetate] <sup>−</sup> | −0.39                  |               | 0.00            | 1.0000          |
| 463.15180  | 14650.97   | 98                    | C <sub>10</sub> H <sub>23</sub> N <sub>12</sub> P <sub>3</sub>                | [M + Acetate] <sup>−</sup> | −0.44                  |               | −0.95           | 0.2019          |
| 463.15180  | 14650.97   | 98                    | C <sub>13</sub> H <sub>29</sub> N <sub>2</sub> O <sub>8</sub> PS              | [M + Acetate] <sup>−</sup> | −0.61                  |               | −0.97           | 0.0012          |

Table S1. Cont.

| <i>m/z</i> | Intensity | ID SIP<br>(Figure S5) | Empirical formula<br>(all- <sup>12</sup> C containing<br>peak)                 | Ion form                   | Mass<br>error<br>(ppm) | KEGG compound | <i>r</i> -value | <i>p</i> -value |
|------------|-----------|-----------------------|--------------------------------------------------------------------------------|----------------------------|------------------------|---------------|-----------------|-----------------|
| 463.15180  | 14650.97  | 98                    | C <sub>8</sub> H <sub>26</sub> N <sub>10</sub> O <sub>3</sub> P <sub>2</sub> S | [M + Acetate] <sup>−</sup> | −1.27                  |               | 0.00            | 1.0000          |
| 463.15180  | 14650.97  | 98                    | C <sub>24</sub> H <sub>16</sub> N <sub>6</sub> O                               | [M + Acetate] <sup>−</sup> | −1.32                  |               | 0.13            | 0.7335          |
| 463.15180  | 14650.97  | 98                    | C <sub>9</sub> H <sub>20</sub> N <sub>14</sub> OS <sub>2</sub>                 | [M + Acetate] <sup>−</sup> | −1.4                   |               | 0.00            | 1.0000          |
| 463.15180  | 14650.97  | 98                    | C <sub>18</sub> H <sub>37</sub> O <sub>5</sub> PS <sub>2</sub>                 | [M + Cl] <sup>−</sup>      | 0.85                   |               | 0.74            | 0.0232          |
| 463.15180  | 14650.97  | 98                    | C <sub>21</sub> H <sub>20</sub> N <sub>10</sub> O                              | [M + Cl] <sup>−</sup>      | 0.53                   |               | 0.82            | 0.0070          |
| 463.15180  | 14650.97  | 98                    | C <sub>28</sub> H <sub>30</sub> P <sub>2</sub>                                 | [M + Cl] <sup>−</sup>      | 0.26                   |               | −0.34           | 0.3700          |
| 463.15180  | 14650.97  | 98                    | C <sub>13</sub> H <sub>34</sub> N <sub>8</sub> P <sub>2</sub> S <sub>2</sub>   | [M + Cl] <sup>−</sup>      | 0.19                   |               | −0.97           | 0.0012          |
| 463.15180  | 14650.97  | 98                    | C <sub>18</sub> H <sub>29</sub> N <sub>4</sub> O <sub>6</sub> P                | [M + Cl] <sup>−</sup>      | −0.16                  |               | 0.74            | 0.0232          |
| 463.15180  | 14650.97  | 98                    | C <sub>13</sub> H <sub>26</sub> N <sub>12</sub> OP <sub>2</sub>                | [M + Cl] <sup>−</sup>      | −0.82                  |               | −0.97           | 0.0012          |
| 463.15180  | 14650.97  | 98                    | C <sub>16</sub> H <sub>32</sub> N <sub>2</sub> O <sub>9</sub> S                | [M + Cl] <sup>−</sup>      | −0.99                  |               | 0.23            | 0.5589          |
| 463.15180  | 14650.97  | 98                    | C <sub>19</sub> H <sub>41</sub> PS <sub>4</sub>                                | [M + Cl] <sup>−</sup>      | −1.03                  |               | 0.91            | 0.0006          |
| 463.15180  | 14650.97  | 98                    | C <sub>20</sub> H <sub>36</sub> N <sub>2</sub> P <sub>4</sub>                  | [M + Cl] <sup>−</sup>      | −1.08                  |               | 0.95            | 0.0001          |
| 463.15180  | 14650.97  | 98                    | C <sub>10</sub> H <sub>28</sub> N <sub>10</sub> O <sub>7</sub> S <sub>2</sub>  | [M − H] <sup>−</sup>       | 1.48                   |               | −0.95           | 0.2019          |
| 463.15180  | 14650.97  | 98                    | C <sub>17</sub> H <sub>38</sub> O <sub>6</sub> P <sub>2</sub> S <sub>2</sub>   | [M − H] <sup>−</sup>       | 1.22                   |               | 0.49            | 0.1825          |
| 463.15180  | 14650.97  | 98                    | C <sub>18</sub> H <sub>32</sub> N <sub>4</sub> O <sub>4</sub> S <sub>3</sub>   | [M − H] <sup>−</sup>       | 1.09                   |               | 0.74            | 0.0232          |
| 463.15180  | 14650.97  | 98                    | C <sub>20</sub> H <sub>21</sub> N <sub>10</sub> O <sub>2</sub> P               | [M − H] <sup>−</sup>       | 0.9                    |               | 0.95            | 0.0001          |
| 463.15180  | 14650.97  | 98                    | C <sub>27</sub> H <sub>31</sub> OP <sub>3</sub>                                | [M − H] <sup>−</sup>       | 0.64                   |               | −0.27           | 0.4907          |
| 463.15180  | 14650.97  | 98                    | C <sub>12</sub> H <sub>35</sub> N <sub>8</sub> OP <sub>3</sub> S <sub>2</sub>  | [M − H] <sup>−</sup>       | 0.56                   |               | −0.94           | 0.0161          |
| 463.15180  | 14650.97  | 98                    | C <sub>10</sub> H <sub>20</sub> N <sub>14</sub> O <sub>8</sub>                 | [M − H] <sup>−</sup>       | 0.48                   |               | −0.95           | 0.2019          |
| 463.15180  | 14650.97  | 98                    | C <sub>17</sub> H <sub>30</sub> N <sub>4</sub> O <sub>7</sub> P <sub>2</sub>   | [M − H] <sup>−</sup>       | 0.21                   |               | 0.49            | 0.1825          |
| 463.15180  | 14650.97  | 98                    | C <sub>18</sub> H <sub>24</sub> N <sub>8</sub> O <sub>5</sub> S                | [M − H] <sup>−</sup>       | 0.08                   |               | 0.74            | 0.0232          |
| 463.15180  | 14650.97  | 98                    | C <sub>26</sub> H <sub>28</sub> N <sub>2</sub> O <sub>2</sub> S <sub>2</sub>   | [M − H] <sup>−</sup>       | −0.31                  |               | −0.17           | 0.6694          |

Table S1. Cont.

| <i>m/z</i> | Intensity  | ID SIP<br>(Figure S5) | Empirical formula<br>(all- <sup>12</sup> C containing<br>peak)                  | Ion form                   | Mass<br>error<br>(ppm) | KEGG compound                                                                                               | <i>r</i> -value | <i>p</i> -value |
|------------|------------|-----------------------|---------------------------------------------------------------------------------|----------------------------|------------------------|-------------------------------------------------------------------------------------------------------------|-----------------|-----------------|
| 463.15180  | 14650.97   | 98                    | C <sub>11</sub> H <sub>32</sub> N <sub>10</sub> O <sub>2</sub> S <sub>4</sub>   | [M – H] <sup>–</sup>       | –0.39                  |                                                                                                             | –0.85           | 0.1493          |
| 463.15180  | 14650.97   | 98                    | C <sub>12</sub> H <sub>27</sub> N <sub>12</sub> O <sub>2</sub> P <sub>3</sub>   | [M – H] <sup>–</sup>       | –0.44                  |                                                                                                             | –0.94           | 0.0161          |
| 463.15180  | 14650.97   | 98                    | C <sub>15</sub> H <sub>33</sub> N <sub>2</sub> O <sub>10</sub> PS               | [M – H] <sup>–</sup>       | –0.61                  |                                                                                                             | –0.30           | 0.4727          |
| 463.15180  | 14650.97   | 98                    | C <sub>19</sub> H <sub>37</sub> N <sub>2</sub> OP <sub>5</sub>                  | [M – H] <sup>–</sup>       | –0.71                  |                                                                                                             | 0.91            | 0.0006          |
| 463.15180  | 14650.97   | 98                    | C <sub>10</sub> H <sub>30</sub> N <sub>10</sub> O <sub>5</sub> P <sub>2</sub> S | [M – H] <sup>–</sup>       | –1.27                  |                                                                                                             | –0.95           | 0.2019          |
| 463.15180  | 14650.97   | 98                    | C <sub>26</sub> H <sub>20</sub> N <sub>6</sub> O <sub>3</sub>                   | [M – H] <sup>–</sup>       | –1.32                  |                                                                                                             | –0.17           | 0.6694          |
| 463.15180  | 14650.97   | 98                    | C <sub>11</sub> H <sub>24</sub> N <sub>14</sub> O <sub>3</sub> S <sub>2</sub>   | [M – H] <sup>–</sup>       | –1.4                   |                                                                                                             | –0.85           | 0.1493          |
| 457.25979  | 15150.5488 | 99                    | C <sub>12</sub> H <sub>35</sub> N <sub>10</sub> OPS                             | [M + Acetate] <sup>–</sup> | 1.25                   |                                                                                                             | 0.81            | 0.4036          |
| 457.25979  | 15150.5488 | 99                    | C <sub>25</sub> H <sub>34</sub> O <sub>4</sub>                                  | [M + Acetate] <sup>–</sup> | 0.5                    | [17-Propylestra-1,3,5(10)-triene-3,17beta-diol diacetate,<br>Pregna-5,16,20-triene-3beta,20-diol diacetate] | 0.37            | 0.1979          |
| 457.25979  | 15150.5488 | 99                    | C <sub>10</sub> H <sub>30</sub> N <sub>12</sub> O <sub>5</sub>                  | [M + Acetate] <sup>–</sup> | –0.6                   |                                                                                                             | 0.93            | 0.2469          |
| 457.25979  | 15150.5488 | 99                    | C <sub>17</sub> H <sub>40</sub> N <sub>2</sub> O <sub>4</sub> P <sub>2</sub>    | [M + Acetate] <sup>–</sup> | –0.87                  |                                                                                                             | –0.59           | 0.2219          |
| 457.25979  | 15150.5488 | 99                    | C <sub>18</sub> H <sub>34</sub> N <sub>6</sub> O <sub>2</sub> S                 | [M + Acetate] <sup>–</sup> | –1.01                  |                                                                                                             | –0.47           | 0.2865          |
| 457.25979  | 15150.5488 | 99                    | C <sub>15</sub> H <sub>38</sub> N <sub>10</sub> O <sub>2</sub> S                | [M + Cl] <sup>–</sup>      | 0.87                   |                                                                                                             | –0.12           | 0.8795          |
| 457.25979  | 15150.5488 | 99                    | C <sub>22</sub> H <sub>48</sub> OP <sub>2</sub> S                               | [M + Cl] <sup>–</sup>      | 0.6                    |                                                                                                             | 0.29            | 0.3794          |
| 457.25979  | 15150.5488 | 99                    | C <sub>23</sub> H <sub>34</sub> N <sub>8</sub>                                  | [M + Cl] <sup>–</sup>      | –0.55                  |                                                                                                             | 0.37            | 0.2388          |
| 457.25979  | 15150.5488 | 99                    | C <sub>20</sub> H <sub>43</sub> N <sub>2</sub> O <sub>5</sub> P                 | [M + Cl] <sup>–</sup>      | –1.25                  |                                                                                                             | –0.12           | 0.7536          |
| 457.25979  | 15150.5488 | 99                    | C <sub>14</sub> H <sub>39</sub> N <sub>10</sub> O <sub>3</sub> PS               | [M – H] <sup>–</sup>       | 1.25                   |                                                                                                             | 0.11            | 0.9285          |
| 457.25979  | 15150.5488 | 99                    | C <sub>22</sub> H <sub>43</sub> N <sub>4</sub> PS <sub>2</sub>                  | [M – H] <sup>–</sup>       | 0.85                   |                                                                                                             | 0.29            | 0.3794          |
| 457.25979  | 15150.5488 | 99                    | C <sub>27</sub> H <sub>38</sub> O <sub>6</sub>                                  | [M – H] <sup>–</sup>       | 0.5                    | [Prednisolone tebutate]                                                                                     | 0.31            | 0.2401          |
| 457.25979  | 15150.5488 | 99                    | C <sub>22</sub> H <sub>35</sub> N <sub>8</sub> OP                               | [M – H] <sup>–</sup>       | –0.17                  |                                                                                                             | 0.29            | 0.3794          |
| 457.25979  | 15150.5488 | 99                    | C <sub>12</sub> H <sub>34</sub> N <sub>12</sub> O <sub>7</sub>                  | [M – H] <sup>–</sup>       | –0.6                   |                                                                                                             | 0.81            | 0.4036          |
| 457.25979  | 15150.5488 | 99                    | C <sub>19</sub> H <sub>44</sub> N <sub>2</sub> O <sub>6</sub> P <sub>2</sub>    | [M – H] <sup>–</sup>       | –0.87                  |                                                                                                             | –0.34           | 0.4139          |



Table S1. Cont.

| <i>m/z</i> | Intensity   | ID SIP<br>(Figure S5) | Empirical formula<br>(all- <sup>12</sup> C containing<br>peak)   | Ion form                   | Mass<br>error<br>(ppm) | KEGG compound                                                                                                                                                                                                                                                     | <i>r</i> -value | <i>p</i> -value |
|------------|-------------|-----------------------|------------------------------------------------------------------|----------------------------|------------------------|-------------------------------------------------------------------------------------------------------------------------------------------------------------------------------------------------------------------------------------------------------------------|-----------------|-----------------|
| 457.25979  | 15150.5488  | 99                    | C <sub>20</sub> H <sub>38</sub> N <sub>6</sub> O <sub>4</sub> S  | [M – H] <sup>–</sup>       | –1.01                  |                                                                                                                                                                                                                                                                   | –0.12           | 0.7536          |
| 457.25979  | 15150.5488  | 99                    | C <sub>28</sub> H <sub>42</sub> OS <sub>2</sub>                  | [M – H] <sup>–</sup>       | –1.41                  |                                                                                                                                                                                                                                                                   | 0.29            | 0.2665          |
| 457.26676  | 28713.725   | 100                   | C <sub>19</sub> H <sub>34</sub> N <sub>4</sub> O <sub>5</sub>    | [M + Acetate] <sup>–</sup> | –0.03                  |                                                                                                                                                                                                                                                                   | –0.92           | 0.0272          |
| 457.26676  | 28713.725   | 100                   | C <sub>14</sub> H <sub>31</sub> N <sub>12</sub> P                | [M + Acetate] <sup>–</sup> | –0.7                   |                                                                                                                                                                                                                                                                   | 0.00            | 1.0000          |
| 457.26676  | 28713.725   | 100                   | C <sub>24</sub> H <sub>42</sub> N <sub>2</sub> O <sub>2</sub> S  | [M + Cl] <sup>–</sup>      | 1.44                   |                                                                                                                                                                                                                                                                   | –0.10           | 0.7779          |
| 457.26676  | 28713.725   | 100                   | C <sub>32</sub> H <sub>38</sub>                                  | [M + Cl] <sup>–</sup>      | 0.02                   |                                                                                                                                                                                                                                                                   | 0.94            | 0.0000          |
| 457.26676  | 28713.725   | 100                   | C <sub>17</sub> H <sub>42</sub> N <sub>8</sub> S <sub>2</sub>    | [M + Cl] <sup>–</sup>      | –0.06                  |                                                                                                                                                                                                                                                                   | –1.00           | 0.0024          |
| 457.26676  | 28713.725   | 100                   | C <sub>17</sub> H <sub>34</sub> N <sub>12</sub> O                | [M + Cl] <sup>–</sup>      | –1.08                  |                                                                                                                                                                                                                                                                   | –1.00           | 0.0024          |
| 457.26676  | 28713.725   | 100                   | C <sub>24</sub> H <sub>44</sub> N <sub>2</sub> P <sub>2</sub>    | [M + Cl] <sup>–</sup>      | –1.35                  |                                                                                                                                                                                                                                                                   | –0.10           | 0.7779          |
| 457.26676  | 28713.725   | 100                   | C <sub>17</sub> H <sub>46</sub> N <sub>6</sub> P <sub>4</sub>    | [M – H] <sup>–</sup>       | 1.29                   |                                                                                                                                                                                                                                                                   | –1.00           | 0.0024          |
| 457.26676  | 28713.725   | 100                   | C <sub>31</sub> H <sub>39</sub> OP                               | [M – H] <sup>–</sup>       | 0.4                    |                                                                                                                                                                                                                                                                   | 0.91            | 0.0000          |
| 457.26676  | 28713.725   | 100                   | C <sub>16</sub> H <sub>43</sub> N <sub>8</sub> OPS <sub>2</sub>  | [M – H] <sup>–</sup>       | 0.32                   |                                                                                                                                                                                                                                                                   | 0.00            | 1.0000          |
| 457.26676  | 28713.725   | 100                   | C <sub>21</sub> H <sub>38</sub> N <sub>4</sub> O <sub>7</sub>    | [M – H] <sup>–</sup>       | –0.03                  |                                                                                                                                                                                                                                                                   | –0.94           | 0.0017          |
| 457.26676  | 28713.725   | 100                   | C <sub>16</sub> H <sub>35</sub> N <sub>12</sub> O <sub>2</sub> P | [M – H] <sup>–</sup>       | –0.7                   |                                                                                                                                                                                                                                                                   | 0.00            | 1.0000          |
| 457.26676  | 28713.725   | 100                   | C <sub>23</sub> H <sub>45</sub> N <sub>2</sub> OP <sub>3</sub>   | [M – H] <sup>–</sup>       | –0.96                  |                                                                                                                                                                                                                                                                   | –0.53           | 0.1382          |
| 467.30118  | 40387.49833 | 101                   | C <sub>24</sub> H <sub>40</sub> O <sub>5</sub>                   | [M + Acetate] <sup>–</sup> | –0.53                  | [3alpha,7alpha,12beta-Trihydroxy-5beta-cholanate,<br>Allocholic acid, Avicholate, Bile salt,<br>Bitocholate, Cholic acid, Haemulcholate,<br>Hyocholate, Ursocholate, Vulpecholate, alpha-Muricholate,<br>beta-Muricholate, beta-Phocaecholate, omega-Muricholate] | –0.76           | 0.0061          |
| 467.30118  | 40387.49833 | 101                   | C <sub>19</sub> H <sub>37</sub> N <sub>8</sub> P                 | [M + Acetate] <sup>–</sup> | –1.18                  |                                                                                                                                                                                                                                                                   | 0.38            | 0.2524          |
| 467.30118  | 40387.49833 | 101                   | C <sub>21</sub> H <sub>44</sub> N <sub>4</sub> O <sub>5</sub>    | [M + Cl] <sup>–</sup>      | 1.3                    |                                                                                                                                                                                                                                                                   | –0.21           | 0.5430          |
| 467.30118  | 40387.49833 | 101                   | C <sub>16</sub> H <sub>41</sub> N <sub>12</sub> P                | [M + Cl] <sup>–</sup>      | 0.65                   |                                                                                                                                                                                                                                                                   | 0.94            | 0.0001          |
| 467.30118  | 40387.49833 | 101                   | C <sub>22</sub> H <sub>48</sub> N <sub>4</sub> S <sub>2</sub>    | [M + Cl] <sup>–</sup>      | –0.56                  |                                                                                                                                                                                                                                                                   | –0.46           | 0.1546          |

Table S1. Cont.

| <i>m/z</i> | Intensity   | ID SIP<br>(Figure S5) | Empirical formula<br>(all- <sup>12</sup> C containing<br>peak)               | Ion form                   | Mass<br>error<br>(ppm) | KEGG compound                                                                                               | <i>r</i> -value | <i>p</i> -value |
|------------|-------------|-----------------------|------------------------------------------------------------------------------|----------------------------|------------------------|-------------------------------------------------------------------------------------------------------------|-----------------|-----------------|
| 467.30118  | 40387.49833 | 101                   | C <sub>15</sub> H <sub>42</sub> N <sub>12</sub> OP <sub>2</sub>              | [M - H] <sup>-</sup>       | 1.02                   |                                                                                                             | 0.96            | 0.0000          |
| 467.30118  | 40387.49833 | 101                   | C <sub>22</sub> H <sub>52</sub> N <sub>2</sub> P <sub>4</sub>                | [M - H] <sup>-</sup>       | 0.76                   |                                                                                                             | -0.46           | 0.1546          |
| 467.30118  | 40387.49833 | 101                   | C <sub>21</sub> H <sub>49</sub> N <sub>4</sub> OPS <sub>2</sub>              | [M - H] <sup>-</sup>       | -0.19                  |                                                                                                             | -0.21           | 0.5430          |
| 467.30118  | 40387.49833 | 101                   | C <sub>26</sub> H <sub>44</sub> O <sub>7</sub>                               | [M - H] <sup>-</sup>       | -0.53                  |                                                                                                             | -0.84           | 0.0011          |
| 467.30118  | 40387.49833 | 101                   | C <sub>21</sub> H <sub>41</sub> N <sub>8</sub> O <sub>2</sub> P              | [M - H] <sup>-</sup>       | -1.18                  |                                                                                                             | -0.21           | 0.5430          |
| 463.26970  | 209476.87   | 102                   | C <sub>18</sub> H <sub>37</sub> N <sub>4</sub> O <sub>4</sub> P              | [M + Acetate] <sup>-</sup> | 1.3                    |                                                                                                             | -0.08           | 0.8302          |
| 463.26970  | 209476.87   | 102                   | C <sub>24</sub> H <sub>36</sub> O <sub>5</sub>                               | [M + Acetate] <sup>-</sup> | -0.93                  | [7alpha,12alpha-Dihydroxy-3-oxochol-4-enoate, Lovastatin]                                                   | 0.95            | 0.0000          |
| 463.26970  | 209476.87   | 102                   | C <sub>21</sub> H <sub>40</sub> N <sub>4</sub> O <sub>5</sub>                | [M + Cl] <sup>-</sup>      | 0.92                   |                                                                                                             | 0.59            | 0.0441          |
| 463.26970  | 209476.87   | 102                   | C <sub>16</sub> H <sub>37</sub> N <sub>12</sub> P                            | [M + Cl] <sup>-</sup>      | 0.26                   |                                                                                                             | -0.48           | 0.2730          |
| 463.26970  | 209476.87   | 102                   | C <sub>14</sub> H <sub>40</sub> N <sub>10</sub> O <sub>3</sub> S             | [M + Cl] <sup>-</sup>      | -0.56                  |                                                                                                             | -0.55           | 0.3408          |
| 463.26970  | 209476.87   | 102                   | C <sub>22</sub> H <sub>44</sub> N <sub>4</sub> S <sub>2</sub>                | [M + Cl] <sup>-</sup>      | -0.95                  |                                                                                                             | 0.73            | 0.0073          |
| 463.26970  | 209476.87   | 102                   | C <sub>20</sub> H <sub>41</sub> N <sub>4</sub> O <sub>6</sub> P              | [M - H] <sup>-</sup>       | 1.3                    |                                                                                                             | 0.39            | 0.2379          |
| 463.26970  | 209476.87   | 102                   | C <sub>15</sub> H <sub>38</sub> N <sub>12</sub> OP <sub>2</sub>              | [M - H] <sup>-</sup>       | 0.64                   |                                                                                                             | -0.54           | 0.2649          |
| 463.26970  | 209476.87   | 102                   | C <sub>22</sub> H <sub>48</sub> N <sub>2</sub> P <sub>4</sub>                | [M - H] <sup>-</sup>       | 0.38                   |                                                                                                             | 0.73            | 0.0073          |
| 463.26970  | 209476.87   | 102                   | C <sub>21</sub> H <sub>45</sub> N <sub>4</sub> OPS <sub>2</sub>              | [M - H] <sup>-</sup>       | -0.58                  |                                                                                                             | 0.59            | 0.0441          |
| 463.26970  | 209476.87   | 102                   | C <sub>26</sub> H <sub>40</sub> O <sub>7</sub>                               | [M - H] <sup>-</sup>       | -0.93                  |                                                                                                             | 0.98            | 0.0000          |
| 457.25979  | 15150.5488  | 103                   | C <sub>12</sub> H <sub>35</sub> N <sub>10</sub> OPS                          | [M + Acetate] <sup>-</sup> | 1.25                   |                                                                                                             | 0.81            | 0.4036          |
| 457.25979  | 15150.5488  | 103                   | C <sub>25</sub> H <sub>34</sub> O <sub>4</sub>                               | [M + Acetate] <sup>-</sup> | 0.5                    | [17-Propylestra-1,3,5(10)-triene-3,17beta-diol diacetate,<br>Pregna-5,16,20-triene-3beta,20-diol diacetate] | 0.37            | 0.1979          |
| 457.25979  | 15150.5488  | 103                   | C <sub>10</sub> H <sub>30</sub> N <sub>12</sub> O <sub>5</sub>               | [M + Acetate] <sup>-</sup> | -0.6                   |                                                                                                             | 0.93            | 0.2469          |
| 457.25979  | 15150.5488  | 103                   | C <sub>17</sub> H <sub>40</sub> N <sub>2</sub> O <sub>4</sub> P <sub>2</sub> | [M + Acetate] <sup>-</sup> | -0.87                  |                                                                                                             | -0.59           | 0.2219          |
| 457.25979  | 15150.5488  | 103                   | C <sub>18</sub> H <sub>34</sub> N <sub>6</sub> O <sub>2</sub> S              | [M + Acetate] <sup>-</sup> | -1.01                  |                                                                                                             | -0.47           | 0.2865          |
| 457.25979  | 15150.5488  | 103                   | C <sub>15</sub> H <sub>38</sub> N <sub>10</sub> O <sub>2</sub> S             | [M + Cl] <sup>-</sup>      | 0.87                   |                                                                                                             | -0.12           | 0.8795          |

Table S1. Cont.

| <i>m/z</i> | Intensity   | ID SIP<br>(Figure S5) | Empirical formula<br>(all- <sup>12</sup> C containing<br>peak)               | Ion form                   | Mass<br>error<br>(ppm) | KEGG compound           | r-value | p-value |
|------------|-------------|-----------------------|------------------------------------------------------------------------------|----------------------------|------------------------|-------------------------|---------|---------|
| 457.25979  | 15150.5488  | 103                   | C <sub>22</sub> H <sub>48</sub> OP <sub>2</sub> S                            | [M + Cl] <sup>-</sup>      | 0.6                    |                         | 0.29    | 0.3794  |
| 457.25979  | 15150.5488  | 103                   | C <sub>23</sub> H <sub>34</sub> N <sub>8</sub>                               | [M + Cl] <sup>-</sup>      | -0.55                  |                         | 0.37    | 0.2388  |
| 457.25979  | 15150.5488  | 103                   | C <sub>20</sub> H <sub>43</sub> N <sub>2</sub> O <sub>5</sub> P              | [M + Cl] <sup>-</sup>      | -1.25                  |                         | -0.12   | 0.7536  |
| 457.25979  | 15150.5488  | 103                   | C <sub>14</sub> H <sub>39</sub> N <sub>10</sub> O <sub>3</sub> PS            | [M - H] <sup>-</sup>       | 1.25                   |                         | 0.11    | 0.9285  |
| 457.25979  | 15150.5488  | 103                   | C <sub>22</sub> H <sub>43</sub> N <sub>4</sub> PS <sub>2</sub>               | [M - H] <sup>-</sup>       | 0.85                   |                         | 0.29    | 0.3794  |
| 457.25979  | 15150.5488  | 103                   | C <sub>27</sub> H <sub>38</sub> O <sub>6</sub>                               | [M - H] <sup>-</sup>       | 0.5                    | [Prednisolone tebutate] | 0.31    | 0.2401  |
| 457.25979  | 15150.5488  | 103                   | C <sub>22</sub> H <sub>35</sub> N <sub>8</sub> OP                            | [M - H] <sup>-</sup>       | -0.17                  |                         | 0.29    | 0.3794  |
| 457.25979  | 15150.5488  | 103                   | C <sub>12</sub> H <sub>34</sub> N <sub>12</sub> O <sub>7</sub>               | [M - H] <sup>-</sup>       | -0.6                   |                         | 0.81    | 0.4036  |
| 457.25979  | 15150.5488  | 103                   | C <sub>19</sub> H <sub>44</sub> N <sub>2</sub> O <sub>6</sub> P <sub>2</sub> | [M - H] <sup>-</sup>       | -0.87                  |                         | -0.34   | 0.4139  |
| 457.25979  | 15150.5488  | 103                   | C <sub>20</sub> H <sub>38</sub> N <sub>6</sub> O <sub>4</sub> S              | [M - H] <sup>-</sup>       | -1.01                  |                         | -0.12   | 0.7536  |
| 457.25979  | 15150.5488  | 103                   | C <sub>28</sub> H <sub>42</sub> OS <sub>2</sub>                              | [M - H] <sup>-</sup>       | -1.41                  |                         | 0.29    | 0.2665  |
| 473.31201  | 361907.5433 | 104                   | C <sub>23</sub> H <sub>42</sub> O <sub>6</sub>                               | [M + Acetate] <sup>-</sup> | 0.03                   |                         | -0.79   | 0.0022  |
| 473.31201  | 361907.5433 | 104                   | C <sub>18</sub> H <sub>39</sub> N <sub>8</sub> OP                            | [M + Acetate] <sup>-</sup> | -0.61                  |                         | 0.05    | 0.8770  |
| 473.31201  | 361907.5433 | 104                   | C <sub>15</sub> H <sub>43</sub> N <sub>12</sub> OP                           | [M + Cl] <sup>-</sup>      | 1.2                    |                         | 0.81    | 0.0015  |
| 473.31201  | 361907.5433 | 104                   | C <sub>21</sub> H <sub>42</sub> N <sub>8</sub> O <sub>2</sub>                | [M + Cl] <sup>-</sup>      | -0.98                  |                         | -0.63   | 0.0288  |
| 473.31201  | 361907.5433 | 104                   | C <sub>25</sub> H <sub>46</sub> O <sub>8</sub>                               | [M - H] <sup>-</sup>       | 0.03                   |                         | -0.82   | 0.0010  |
| 473.31201  | 361907.5433 | 104                   | C <sub>20</sub> H <sub>43</sub> N <sub>8</sub> O <sub>3</sub> P              | [M - H] <sup>-</sup>       | -0.61                  |                         | -0.46   | 0.1318  |
| 473.31201  | 361907.5433 | 104                   | C <sub>28</sub> H <sub>47</sub> N <sub>2</sub> PS                            | [M - H] <sup>-</sup>       | -1                     |                         | -0.79   | 0.0021  |
| 471.25971  | 81347.33833 | 105                   | C <sub>11</sub> H <sub>34</sub> N <sub>12</sub> OP <sub>2</sub>              | [M + Acetate] <sup>-</sup> | 1.01                   |                         | 0.20    | 0.7981  |
| 471.25971  | 81347.33833 | 105                   | C <sub>18</sub> H <sub>44</sub> N <sub>2</sub> P <sub>4</sub>                | [M + Acetate] <sup>-</sup> | 0.76                   |                         | 0.99    | 0.0001  |
| 471.25971  | 81347.33833 | 105                   | C <sub>17</sub> H <sub>41</sub> N <sub>4</sub> OPS <sub>2</sub>              | [M + Acetate] <sup>-</sup> | -0.18                  |                         | 0.97    | 0.0017  |
| 471.25971  | 81347.33833 | 105                   | C <sub>22</sub> H <sub>36</sub> O <sub>7</sub>                               | [M + Acetate] <sup>-</sup> | -0.53                  | [Grayanotoxin I]        | 0.58    | 0.2255  |
| 471.25971  | 81347.33833 | 105                   | C <sub>17</sub> H <sub>33</sub> N <sub>8</sub> O <sub>2</sub> P              | [M + Acetate] <sup>-</sup> | -1.17                  |                         | 0.97    | 0.0017  |

Table S1. Cont.

| <i>m/z</i> | Intensity   | ID SIP<br>(Figure S5) | Empirical formula<br>(all- <sup>12</sup> C containing<br>peak)                | Ion form                   | Mass<br>error<br>(ppm) | KEGG compound                 | <i>r</i> -value | <i>p</i> -value |
|------------|-------------|-----------------------|-------------------------------------------------------------------------------|----------------------------|------------------------|-------------------------------|-----------------|-----------------|
| 471.25971  | 81347.33833 | 105                   | C <sub>19</sub> H <sub>40</sub> N <sub>4</sub> O <sub>7</sub>                 | [M + Cl] <sup>−</sup>      | 1.29                   |                               | 0.92            | 0.0101          |
| 471.25971  | 81347.33833 | 105                   | C <sub>14</sub> H <sub>37</sub> N <sub>12</sub> O <sub>2</sub> P              | [M + Cl] <sup>−</sup>      | 0.64                   |                               | 0.53            | 0.2741          |
| 471.25971  | 81347.33833 | 105                   | C <sub>21</sub> H <sub>47</sub> N <sub>2</sub> OP <sub>3</sub>                | [M + Cl] <sup>−</sup>      | 0.38                   |                               | 0.68            | 0.1356          |
| 471.25971  | 81347.33833 | 105                   | C <sub>20</sub> H <sub>44</sub> N <sub>4</sub> O <sub>2</sub> S <sub>2</sub>  | [M + Cl] <sup>−</sup>      | −0.56                  |                               | 0.80            | 0.0565          |
| 471.25971  | 81347.33833 | 105                   | C <sub>13</sub> H <sub>38</sub> N <sub>12</sub> O <sub>3</sub> P <sub>2</sub> | [M − H] <sup>−</sup>       | 1.01                   |                               | 0.39            | 0.4435          |
| 471.25971  | 81347.33833 | 105                   | C <sub>20</sub> H <sub>48</sub> N <sub>2</sub> O <sub>2</sub> P <sub>4</sub>  | [M − H] <sup>−</sup>       | 0.76                   |                               | 0.80            | 0.0565          |
| 471.25971  | 81347.33833 | 105                   | C <sub>21</sub> H <sub>42</sub> N <sub>6</sub> P <sub>2</sub> S               | [M − H] <sup>−</sup>       | 0.62                   |                               | 0.68            | 0.1356          |
| 471.25971  | 81347.33833 | 105                   | C <sub>19</sub> H <sub>45</sub> N <sub>4</sub> O <sub>3</sub> PS <sub>2</sub> | [M − H] <sup>−</sup>       | −0.18                  |                               | 0.92            | 0.0101          |
| 471.25971  | 81347.33833 | 105                   | C <sub>24</sub> H <sub>40</sub> O <sub>9</sub>                                | [M − H] <sup>−</sup>       | −0.53                  |                               | 0.44            | 0.3875          |
| 471.25971  | 81347.33833 | 105                   | C <sub>19</sub> H <sub>37</sub> N <sub>8</sub> O <sub>4</sub> P               | [M − H] <sup>−</sup>       | −1.17                  |                               | 0.92            | 0.0101          |
| 465.35894  | 27617.706   | 106                   | C <sub>26</sub> H <sub>46</sub> O <sub>3</sub>                                | [M + Acetate] <sup>−</sup> | 0.84                   |                               | 0.69            | 0.0277          |
| 465.35894  | 27617.706   | 106                   | C <sub>19</sub> H <sub>46</sub> N <sub>6</sub> OS                             | [M + Acetate] <sup>−</sup> | −0.63                  |                               | 0.28            | 0.4349          |
| 465.35894  | 27617.706   | 106                   | C <sub>28</sub> H <sub>50</sub> O <sub>5</sub>                                | [M − H] <sup>−</sup>       | 0.84                   | [6alpha-Hydroxy-castasterone] | 0.44            | 0.2028          |
| 465.35894  | 27617.706   | 106                   | C <sub>23</sub> H <sub>47</sub> N <sub>8</sub> P                              | [M − H] <sup>−</sup>       | 0.19                   |                               | 0.86            | 0.0012          |
| 465.35894  | 27617.706   | 106                   | C <sub>21</sub> H <sub>50</sub> N <sub>6</sub> O <sub>3</sub> S               | [M − H] <sup>−</sup>       | −0.63                  |                               | 0.62            | 0.0583          |
| 465.35894  | 27617.706   | 106                   | C <sub>29</sub> H <sub>54</sub> S <sub>2</sub>                                | [M − H] <sup>−</sup>       | −1.03                  |                               | 0.34            | 0.3428          |
| 475.12277  | 16099.36167 | 107                   | C <sub>25</sub> H <sub>20</sub> O <sub>4</sub> S                              | [M + Acetate] <sup>−</sup> | 1.44                   |                               | −0.58           | 0.2262          |
| 475.12277  | 16099.36167 | 107                   | C <sub>10</sub> H <sub>24</sub> N <sub>8</sub> O <sub>4</sub> S <sub>3</sub>  | [M + Acetate] <sup>−</sup> | 1.36                   |                               | −0.35           | 0.5620          |
| 475.12277  | 16099.36167 | 107                   | C <sub>12</sub> H <sub>13</sub> N <sub>14</sub> O <sub>2</sub> P              | [M + Acetate] <sup>−</sup> | 1.18                   |                               | 0.75            | 0.0854          |
| 475.12277  | 16099.36167 | 107                   | C <sub>14</sub> H <sub>25</sub> O <sub>12</sub> P                             | [M + Acetate] <sup>−</sup> | 1.15                   |                               | 0.89            | 0.0182          |
| 475.12277  | 16099.36167 | 107                   | C <sub>18</sub> H <sub>28</sub> N <sub>2</sub> OS <sub>4</sub>                | [M + Acetate] <sup>−</sup> | 0.98                   |                               | −0.21           | 0.6847          |
| 475.12277  | 16099.36167 | 107                   | C <sub>19</sub> H <sub>23</sub> N <sub>4</sub> OP <sub>3</sub>                | [M + Acetate] <sup>−</sup> | 0.93                   |                               | −0.32           | 0.5350          |
| 475.12277  | 16099.36167 | 107                   | C <sub>9</sub> H <sub>22</sub> N <sub>8</sub> O <sub>7</sub> P <sub>2</sub>   | [M + Acetate] <sup>−</sup> | 0.51                   |                               | −0.91           | 0.0938          |

Table S1. Cont.

| <i>m/z</i> | Intensity   | ID SIP<br>(Figure S5) | Empirical formula<br>(all- <sup>12</sup> C containing<br>peak)                              | Ion form                   | Mass<br>error<br>(ppm) | KEGG compound | <i>r</i> -value | <i>p</i> -value |
|------------|-------------|-----------------------|---------------------------------------------------------------------------------------------|----------------------------|------------------------|---------------|-----------------|-----------------|
| 475.12277  | 16099.36167 | 107                   | C <sub>10</sub> H <sub>16</sub> N <sub>12</sub> O <sub>5</sub> S                            | [M + Acetate] <sup>−</sup> | 0.38                   |               | −0.35           | 0.5620          |
| 475.12277  | 16099.36167 | 107                   | C <sub>17</sub> H <sub>26</sub> N <sub>2</sub> O <sub>4</sub> P <sub>2</sub> S              | [M + Acetate] <sup>−</sup> | 0.13                   |               | −0.06           | 0.9122          |
| 475.12277  | 16099.36167 | 107                   | C <sub>18</sub> H <sub>20</sub> N <sub>6</sub> O <sub>2</sub> S <sub>2</sub>                | [M + Acetate] <sup>−</sup> | 0                      |               | −0.21           | 0.6847          |
| 475.12277  | 16099.36167 | 107                   | C <sub>11</sub> H <sub>29</sub> N <sub>6</sub> OP <sub>5</sub>                              | [M + Acetate] <sup>−</sup> | −0.38                  |               | 0.45            | 0.3690          |
| 475.12277  | 16099.36167 | 107                   | C <sub>15</sub> H <sub>29</sub> O <sub>7</sub> PS <sub>2</sub>                              | [M + Acetate] <sup>−</sup> | −0.67                  |               | 0.51            | 0.3002          |
| 475.12277  | 16099.36167 | 107                   | C <sub>18</sub> H <sub>12</sub> N <sub>10</sub> O <sub>3</sub>                              | [M + Acetate] <sup>−</sup> | −0.99                  |               | −0.21           | 0.6847          |
| 475.12277  | 16099.36167 | 107                   | C <sub>25</sub> H <sub>22</sub> O <sub>2</sub> P <sub>2</sub>                               | [M + Acetate] <sup>−</sup> | −1.24                  |               | −0.58           | 0.2262          |
| 475.12277  | 16099.36167 | 107                   | C <sub>10</sub> H <sub>26</sub> N <sub>8</sub> O <sub>2</sub> P <sub>2</sub> S <sub>2</sub> | [M + Acetate] <sup>−</sup> | −1.32                  |               | −0.35           | 0.5620          |
| 475.12277  | 16099.36167 | 107                   | C <sub>26</sub> H <sub>16</sub> N <sub>4</sub> S                                            | [M + Acetate] <sup>−</sup> | −1.37                  |               | −0.60           | 0.2093          |
| 475.12277  | 16099.36167 | 107                   | C <sub>11</sub> H <sub>20</sub> N <sub>12</sub> S <sub>3</sub>                              | [M + Acetate] <sup>−</sup> | −1.45                  |               | 0.45            | 0.3690          |
| 475.12277  | 16099.36167 | 107                   | C <sub>8</sub> H <sub>33</sub> N <sub>10</sub> OP <sub>5</sub>                              | [M + Cl] <sup>−</sup>      | 1.42                   |               | −1.00           | 0.0276          |
| 475.12277  | 16099.36167 | 107                   | C <sub>15</sub> H <sub>16</sub> N <sub>14</sub> O <sub>3</sub>                              | [M + Cl] <sup>−</sup>      | 0.82                   |               | 0.51            | 0.3002          |
| 475.12277  | 16099.36167 | 107                   | C <sub>17</sub> H <sub>28</sub> O <sub>13</sub>                                             | [M + Cl] <sup>−</sup>      | 0.79                   |               | −0.06           | 0.9122          |
| 475.12277  | 16099.36167 | 107                   | C <sub>22</sub> H <sub>26</sub> N <sub>4</sub> O <sub>2</sub> P <sub>2</sub>                | [M + Cl] <sup>−</sup>      | 0.56                   |               | −0.50           | 0.3130          |
| 475.12277  | 16099.36167 | 107                   | C <sub>7</sub> H <sub>30</sub> N <sub>12</sub> O <sub>2</sub> P <sub>2</sub> S <sub>2</sub> | [M + Cl] <sup>−</sup>      | 0.48                   |               | 0.00            | 1.0000          |
| 475.12277  | 16099.36167 | 107                   | C <sub>23</sub> H <sub>20</sub> N <sub>8</sub> S                                            | [M + Cl] <sup>−</sup>      | 0.43                   |               | −0.53           | 0.2758          |
| 475.12277  | 16099.36167 | 107                   | C <sub>12</sub> H <sub>25</sub> N <sub>8</sub> O <sub>8</sub> P                             | [M + Cl] <sup>−</sup>      | 0.14                   |               | 0.75            | 0.0854          |
| 475.12277  | 16099.36167 | 107                   | C <sub>20</sub> H <sub>29</sub> N <sub>2</sub> O <sub>5</sub> PS                            | [M + Cl] <sup>−</sup>      | −0.24                  |               | −0.40           | 0.4339          |
| 475.12277  | 16099.36167 | 107                   | C <sub>10</sub> H <sub>28</sub> N <sub>6</sub> O <sub>11</sub> S                            | [M + Cl] <sup>−</sup>      | −0.66                  |               | −0.35           | 0.5620          |
| 475.12277  | 16099.36167 | 107                   | C <sub>14</sub> H <sub>32</sub> N <sub>6</sub> O <sub>2</sub> P <sub>4</sub>                | [M + Cl] <sup>−</sup>      | −0.75                  |               | 0.89            | 0.0182          |
| 475.12277  | 16099.36167 | 107                   | C <sub>15</sub> H <sub>26</sub> N <sub>10</sub> P <sub>2</sub> S                            | [M + Cl] <sup>−</sup>      | −0.88                  |               | 0.51            | 0.3002          |
| 475.12277  | 16099.36167 | 107                   | C <sub>18</sub> H <sub>32</sub> O <sub>8</sub> S <sub>2</sub>                               | [M + Cl] <sup>−</sup>      | −1.04                  |               | −0.21           | 0.6847          |
| 475.12277  | 16099.36167 | 107                   | C <sub>5</sub> H <sub>25</sub> N <sub>14</sub> O <sub>6</sub> PS                            | [M + Cl] <sup>−</sup>      | −1.3                   |               | 0.00            | 1.0000          |

Table S1. Cont.

| <i>m/z</i> | Intensity   | ID SIP<br>(Figure S5) | Empirical formula<br>(all- <sup>12</sup> C containing<br>peak)                              | Ion form             | Mass<br>error<br>(ppm) | KEGG compound | <i>r</i> -value | <i>p</i> -value |
|------------|-------------|-----------------------|---------------------------------------------------------------------------------------------|----------------------|------------------------|---------------|-----------------|-----------------|
| 475.12277  | 16099.36167 | 107                   | C <sub>27</sub> H <sub>24</sub> O <sub>6</sub> S                                            | [M – H] <sup>–</sup> | 1.44                   |               | –0.61           | 0.1959          |
| 475.12277  | 16099.36167 | 107                   | C <sub>12</sub> H <sub>28</sub> N <sub>8</sub> O <sub>6</sub> S <sub>3</sub>                | [M – H] <sup>–</sup> | 1.36                   |               | 0.75            | 0.0854          |
| 475.12277  | 16099.36167 | 107                   | C <sub>14</sub> H <sub>17</sub> N <sub>14</sub> O <sub>4</sub> P                            | [M – H] <sup>–</sup> | 1.18                   |               | 0.89            | 0.0182          |
| 475.12277  | 16099.36167 | 107                   | C <sub>16</sub> H <sub>26</sub> O <sub>14</sub> P                                           | [M – H] <sup>–</sup> | 1.15                   |               | 0.17            | 0.7445          |
| 475.12277  | 16099.36167 | 107                   | C <sub>20</sub> H <sub>32</sub> N <sub>2</sub> O <sub>3</sub> S <sub>4</sub>                | [M – H] <sup>–</sup> | 0.98                   |               | –0.40           | 0.4339          |
| 475.12277  | 16099.36167 | 107                   | C <sub>21</sub> H <sub>27</sub> N <sub>4</sub> O <sub>3</sub> P <sub>3</sub>                | [M – H] <sup>–</sup> | 0.93                   |               | –0.46           | 0.3635          |
| 475.12277  | 16099.36167 | 107                   | C <sub>22</sub> H <sub>21</sub> N <sub>8</sub> OPS                                          | [M – H] <sup>–</sup> | 0.8                    |               | –0.50           | 0.3130          |
| 475.12277  | 16099.36167 | 107                   | C <sub>11</sub> H <sub>26</sub> N <sub>8</sub> O <sub>9</sub> P <sub>2</sub>                | [M – H] <sup>–</sup> | 0.51                   |               | 0.45            | 0.3690          |
| 475.12277  | 16099.36167 | 107                   | C <sub>14</sub> H <sub>35</sub> N <sub>6</sub> P <sub>3</sub> S <sub>3</sub>                | [M – H] <sup>–</sup> | 0.47                   |               | 0.89            | 0.0182          |
| 475.12277  | 16099.36167 | 107                   | C <sub>12</sub> H <sub>20</sub> N <sub>12</sub> O <sub>7</sub> S                            | [M – H] <sup>–</sup> | 0.38                   |               | 0.75            | 0.0854          |
| 475.12277  | 16099.36167 | 107                   | C <sub>19</sub> H <sub>30</sub> N <sub>2</sub> O <sub>6</sub> P <sub>2</sub> S              | [M – H] <sup>–</sup> | 0.13                   |               | –0.32           | 0.5350          |
| 475.12277  | 16099.36167 | 107                   | C <sub>20</sub> H <sub>24</sub> N <sub>6</sub> O <sub>4</sub> S <sub>2</sub>                | [M – H] <sup>–</sup> | 0                      |               | –0.40           | 0.4339          |
| 475.12277  | 16099.36167 | 107                   | C <sub>13</sub> H <sub>33</sub> N <sub>6</sub> O <sub>3</sub> P <sub>5</sub>                | [M – H] <sup>–</sup> | –0.38                  |               | 0.98            | 0.0007          |
| 475.12277  | 16099.36167 | 107                   | C <sub>28</sub> H <sub>28</sub> OS <sub>3</sub>                                             | [M – H] <sup>–</sup> | –0.39                  |               | –0.62           | 0.1851          |
| 475.12277  | 16099.36167 | 107                   | C <sub>13</sub> H <sub>32</sub> N <sub>8</sub> OS <sub>5</sub>                              | [M – H] <sup>–</sup> | –0.46                  |               | 0.98            | 0.0007          |
| 475.12277  | 16099.36167 | 107                   | C <sub>14</sub> H <sub>27</sub> N <sub>10</sub> OP <sub>3</sub> S                           | [M – H] <sup>–</sup> | –0.51                  |               | 0.89            | 0.0182          |
| 475.12277  | 16099.36167 | 107                   | C <sub>17</sub> H <sub>33</sub> O <sub>9</sub> PS <sub>2</sub>                              | [M – H] <sup>–</sup> | –0.67                  |               | –0.06           | 0.9122          |
| 475.12277  | 16099.36167 | 107                   | C <sub>21</sub> H <sub>37</sub> P <sub>5</sub> S                                            | [M – H] <sup>–</sup> | –0.77                  |               | –0.46           | 0.3635          |
| 475.12277  | 16099.36167 | 107                   | C <sub>20</sub> H <sub>16</sub> N <sub>10</sub> O <sub>5</sub>                              | [M – H] <sup>–</sup> | –0.99                  |               | –0.40           | 0.4339          |
| 475.12277  | 16099.36167 | 107                   | C <sub>27</sub> H <sub>26</sub> O <sub>4</sub> P <sub>2</sub>                               | [M – H] <sup>–</sup> | –1.24                  |               | –0.61           | 0.1959          |
| 475.12277  | 16099.36167 | 107                   | C <sub>12</sub> H <sub>30</sub> N <sub>8</sub> O <sub>4</sub> P <sub>2</sub> S <sub>2</sub> | [M – H] <sup>–</sup> | –1.32                  |               | 0.75            | 0.0854          |
| 475.12277  | 16099.36167 | 107                   | C <sub>28</sub> H <sub>20</sub> N <sub>4</sub> O <sub>2</sub> S                             | [M – H] <sup>–</sup> | –1.37                  |               | –0.62           | 0.1851          |
| 475.12277  | 16099.36167 | 107                   | C <sub>13</sub> H <sub>24</sub> N <sub>12</sub> O <sub>2</sub> S <sub>3</sub>               | [M – H] <sup>–</sup> | –1.45                  |               | 0.98            | 0.0007          |

Table S1. Cont.

| <i>m/z</i> | Intensity   | ID SIP<br>(Figure S5) | Empirical formula<br>(all- <sup>12</sup> C containing<br>peak)   | Ion form                   | Mass<br>error<br>(ppm) | KEGG compound                                                                                                                                                                                                                                                     | <i>r</i> -value | <i>p</i> -value |
|------------|-------------|-----------------------|------------------------------------------------------------------|----------------------------|------------------------|-------------------------------------------------------------------------------------------------------------------------------------------------------------------------------------------------------------------------------------------------------------------|-----------------|-----------------|
| 457.26676  | 28713.725   | 108                   | C <sub>19</sub> H <sub>34</sub> N <sub>4</sub> O <sub>5</sub>    | [M + Acetate] <sup>−</sup> | −0.03                  |                                                                                                                                                                                                                                                                   | −0.92           | 0.0272          |
| 457.26676  | 28713.725   | 108                   | C <sub>14</sub> H <sub>31</sub> N <sub>12</sub> P                | [M + Acetate] <sup>−</sup> | −0.7                   |                                                                                                                                                                                                                                                                   | 0.00            | 1.0000          |
| 457.26676  | 28713.725   | 108                   | C <sub>24</sub> H <sub>42</sub> N <sub>2</sub> O <sub>2</sub> S  | [M + Cl] <sup>−</sup>      | 1.44                   |                                                                                                                                                                                                                                                                   | −0.10           | 0.7779          |
| 457.26676  | 28713.725   | 108                   | C <sub>32</sub> H <sub>38</sub>                                  | [M + Cl] <sup>−</sup>      | 0.02                   |                                                                                                                                                                                                                                                                   | 0.94            | 0.0000          |
| 457.26676  | 28713.725   | 108                   | C <sub>17</sub> H <sub>42</sub> N <sub>8</sub> S <sub>2</sub>    | [M + Cl] <sup>−</sup>      | −0.06                  |                                                                                                                                                                                                                                                                   | −1.00           | 0.0024          |
| 457.26676  | 28713.725   | 108                   | C <sub>17</sub> H <sub>34</sub> N <sub>12</sub> O                | [M + Cl] <sup>−</sup>      | −1.08                  |                                                                                                                                                                                                                                                                   | −1.00           | 0.0024          |
| 457.26676  | 28713.725   | 108                   | C <sub>24</sub> H <sub>44</sub> N <sub>2</sub> P <sub>2</sub>    | [M + Cl] <sup>−</sup>      | −1.35                  |                                                                                                                                                                                                                                                                   | −0.10           | 0.7779          |
| 457.26676  | 28713.725   | 108                   | C <sub>17</sub> H <sub>46</sub> N <sub>6</sub> P <sub>4</sub>    | [M − H] <sup>−</sup>       | 1.29                   |                                                                                                                                                                                                                                                                   | −1.00           | 0.0024          |
| 457.26676  | 28713.725   | 108                   | C <sub>31</sub> H <sub>39</sub> OP                               | [M − H] <sup>−</sup>       | 0.4                    |                                                                                                                                                                                                                                                                   | 0.91            | 0.0000          |
| 457.26676  | 28713.725   | 108                   | C <sub>16</sub> H <sub>43</sub> N <sub>8</sub> OPS <sub>2</sub>  | [M − H] <sup>−</sup>       | 0.32                   |                                                                                                                                                                                                                                                                   | 0.00            | 1.0000          |
| 457.26676  | 28713.725   | 108                   | C <sub>21</sub> H <sub>38</sub> N <sub>4</sub> O <sub>7</sub>    | [M − H] <sup>−</sup>       | −0.03                  |                                                                                                                                                                                                                                                                   | −0.94           | 0.0017          |
| 457.26676  | 28713.725   | 108                   | C <sub>16</sub> H <sub>35</sub> N <sub>12</sub> O <sub>2</sub> P | [M − H] <sup>−</sup>       | −0.7                   |                                                                                                                                                                                                                                                                   | 0.00            | 1.0000          |
| 457.26676  | 28713.725   | 108                   | C <sub>23</sub> H <sub>45</sub> N <sub>2</sub> OP <sub>3</sub>   | [M − H] <sup>−</sup>       | −0.96                  |                                                                                                                                                                                                                                                                   | −0.53           | 0.1382          |
| 467.30118  | 40387.49833 | 109                   | C <sub>24</sub> H <sub>40</sub> O <sub>5</sub>                   | [M + Acetate] <sup>−</sup> | −0.53                  | [3alpha,7alpha,12beta-Trihydroxy-5beta-cholanate,<br>Allocholic acid, Avicholate, Bile salt, Bitocholate,<br>Cholic acid, Haemulcholate, Hyocholate, Ursocholate,<br>Vulpecholate, alpha-Muricholate, beta-Muricholate,<br>beta-Phocaecholate, omega-Muricholate] | −0.76           | 0.0061          |
| 467.30118  | 40387.49833 | 109                   | C <sub>19</sub> H <sub>37</sub> N <sub>8</sub> P                 | [M + Acetate] <sup>−</sup> | −1.18                  |                                                                                                                                                                                                                                                                   | 0.38            | 0.2524          |
| 467.30118  | 40387.49833 | 109                   | C <sub>21</sub> H <sub>44</sub> N <sub>4</sub> O <sub>5</sub>    | [M + Cl] <sup>−</sup>      | 1.3                    |                                                                                                                                                                                                                                                                   | −0.21           | 0.5430          |
| 467.30118  | 40387.49833 | 109                   | C <sub>16</sub> H <sub>41</sub> N <sub>12</sub> P                | [M + Cl] <sup>−</sup>      | 0.65                   |                                                                                                                                                                                                                                                                   | 0.94            | 0.0001          |
| 467.30118  | 40387.49833 | 109                   | C <sub>22</sub> H <sub>48</sub> N <sub>4</sub> S <sub>2</sub>    | [M + Cl] <sup>−</sup>      | −0.56                  |                                                                                                                                                                                                                                                                   | −0.46           | 0.1546          |
| 467.30118  | 40387.49833 | 109                   | C <sub>15</sub> H <sub>42</sub> N <sub>12</sub> OP <sub>2</sub>  | [M − H] <sup>−</sup>       | 1.02                   |                                                                                                                                                                                                                                                                   | 0.96            | 0.0000          |

Table S1. Cont.

| <i>m/z</i> | Intensity   | ID SIP<br>(Figure S5) | Empirical formula<br>(all- <sup>12</sup> C containing<br>peak)    | Ion form                   | Mass<br>error<br>(ppm) | KEGG compound | <i>r</i> -value | <i>p</i> -value |
|------------|-------------|-----------------------|-------------------------------------------------------------------|----------------------------|------------------------|---------------|-----------------|-----------------|
| 467.30118  | 40387.49833 | 109                   | C <sub>22</sub> H <sub>52</sub> N <sub>2</sub> P <sub>4</sub>     | [M – H] <sup>–</sup>       | 0.76                   |               | –0.46           | 0.1546          |
| 467.30118  | 40387.49833 | 109                   | C <sub>21</sub> H <sub>49</sub> N <sub>4</sub> OPS <sub>2</sub>   | [M – H] <sup>–</sup>       | –0.19                  |               | –0.21           | 0.5430          |
| 467.30118  | 40387.49833 | 109                   | C <sub>26</sub> H <sub>44</sub> O <sub>7</sub>                    | [M – H] <sup>–</sup>       | –0.53                  |               | –0.84           | 0.0011          |
| 467.30118  | 40387.49833 | 109                   | C <sub>21</sub> H <sub>41</sub> N <sub>8</sub> O <sub>2</sub> P   | [M – H] <sup>–</sup>       | –1.18                  |               | –0.21           | 0.5430          |
| 473.29075  | 26306.27167 | 110                   | C <sub>13</sub> H <sub>39</sub> N <sub>10</sub> OPS               | [M + Acetate] <sup>–</sup> | 0.49                   |               | 0.00            | 1.0000          |
| 473.29075  | 26306.27167 | 110                   | C <sub>26</sub> H <sub>38</sub> O <sub>4</sub>                    | [M + Acetate] <sup>–</sup> | –0.24                  | [Lupulone]    | 0.74            | 0.0214          |
| 473.29075  | 26306.27167 | 110                   | C <sub>11</sub> H <sub>34</sub> N <sub>12</sub> O <sub>5</sub>    | [M + Acetate] <sup>–</sup> | –1.3                   |               | 0.00            | 1.0000          |
| 473.29075  | 26306.27167 | 110                   | C <sub>16</sub> H <sub>42</sub> N <sub>10</sub> O <sub>2</sub> S  | [M + Cl] <sup>–</sup>      | 0.12                   |               | –0.56           | 0.4388          |
| 473.29075  | 26306.27167 | 110                   | C <sub>24</sub> H <sub>38</sub> N <sub>8</sub>                    | [M + Cl] <sup>–</sup>      | –1.25                  |               | 0.53            | 0.1426          |
| 473.29075  | 26306.27167 | 110                   | C <sub>17</sub> H <sub>40</sub> N <sub>12</sub> P <sub>2</sub>    | [M – H] <sup>–</sup>       | 1.29                   |               | –0.60           | 0.2844          |
| 473.29075  | 26306.27167 | 110                   | C <sub>15</sub> H <sub>43</sub> N <sub>10</sub> O <sub>3</sub> PS | [M – H] <sup>–</sup>       | 0.49                   |               | 0.00            | 1.0000          |
| 473.29075  | 26306.27167 | 110                   | C <sub>23</sub> H <sub>47</sub> N <sub>4</sub> PS <sub>2</sub>    | [M – H] <sup>–</sup>       | 0.1                    |               | 0.39            | 0.2937          |
| 473.29075  | 26306.27167 | 110                   | C <sub>28</sub> H <sub>42</sub> O <sub>6</sub>                    | [M – H] <sup>–</sup>       | –0.24                  |               | 0.91            | 0.0006          |
| 473.29075  | 26306.27167 | 110                   | C <sub>23</sub> H <sub>39</sub> N <sub>8</sub> OP                 | [M – H] <sup>–</sup>       | –0.88                  |               | 0.39            | 0.2937          |
| 473.29075  | 26306.27167 | 110                   | C <sub>13</sub> H <sub>38</sub> N <sub>12</sub> O <sub>7</sub>    | [M – H] <sup>–</sup>       | –1.3                   |               | 0.00            | 1.0000          |
| 481.31693  | 13797.74867 | 111                   | C <sub>25</sub> H <sub>42</sub> O <sub>5</sub>                    | [M + Acetate] <sup>–</sup> | –0.31                  |               | –0.56           | 0.2476          |
| 481.31693  | 13797.74867 | 111                   | C <sub>20</sub> H <sub>39</sub> N <sub>8</sub> P                  | [M + Acetate] <sup>–</sup> | –0.94                  |               | –0.16           | 0.7689          |
| 481.31693  | 13797.74867 | 111                   | C <sub>22</sub> H <sub>46</sub> N <sub>4</sub> O <sub>5</sub>     | [M + Cl] <sup>–</sup>      | 1.47                   |               | –0.41           | 0.4248          |
| 481.31693  | 13797.74867 | 111                   | C <sub>17</sub> H <sub>43</sub> N <sub>12</sub> P                 | [M + Cl] <sup>–</sup>      | 0.84                   |               | 0.86            | 0.0265          |
| 481.31693  | 13797.74867 | 111                   | C <sub>23</sub> H <sub>50</sub> N <sub>4</sub> S <sub>2</sub>     | [M + Cl] <sup>–</sup>      | –0.34                  |               | –0.47           | 0.3417          |
| 481.31693  | 13797.74867 | 111                   | C <sub>23</sub> H <sub>42</sub> N <sub>8</sub> O                  | [M + Cl] <sup>–</sup>      | –1.31                  |               | –0.47           | 0.3417          |
| 481.31693  | 13797.74867 | 111                   | C <sub>16</sub> H <sub>44</sub> N <sub>12</sub> OP <sub>2</sub>   | [M – H] <sup>–</sup>       | 1.2                    |               | 0.93            | 0.0070          |
| 481.31693  | 13797.74867 | 111                   | C <sub>23</sub> H <sub>54</sub> N <sub>2</sub> P <sub>4</sub>     | [M – H] <sup>–</sup>       | 0.95                   |               | –0.47           | 0.3417          |



Table S1. Cont.

| <i>m/z</i> | Intensity   | ID SIP<br>(Figure S5) | Empirical formula<br>(all- <sup>12</sup> C containing<br>peak)                | Ion form                   | Mass<br>error<br>(ppm) | KEGG compound                       | <i>r</i> -value | <i>p</i> -value |
|------------|-------------|-----------------------|-------------------------------------------------------------------------------|----------------------------|------------------------|-------------------------------------|-----------------|-----------------|
| 481.31693  | 13797.74867 | 111                   | C <sub>22</sub> H <sub>51</sub> N <sub>4</sub> OPS <sub>2</sub>               | [M – H] <sup>–</sup>       | 0.03                   |                                     | –0.41           | 0.4248          |
| 481.31693  | 13797.74867 | 111                   | C <sub>27</sub> H <sub>46</sub> O <sub>7</sub>                                | [M – H] <sup>–</sup>       | –0.31                  |                                     | –0.61           | 0.1996          |
| 481.31693  | 13797.74867 | 111                   | C <sub>22</sub> H <sub>43</sub> N <sub>8</sub> O <sub>2</sub> P               | [M – H] <sup>–</sup>       | –0.94                  |                                     | –0.41           | 0.4248          |
| 481.28025  | 144511.525  | 112                   | C <sub>18</sub> H <sub>39</sub> N <sub>4</sub> O <sub>5</sub> P               | [M + Acetate] <sup>–</sup> | 1.22                   |                                     | 0.29            | 0.5248          |
| 481.28025  | 144511.525  | 112                   | C <sub>13</sub> H <sub>36</sub> N <sub>12</sub> P <sub>2</sub>                | [M + Acetate] <sup>–</sup> | 0.59                   |                                     | –0.91           | 0.2788          |
| 481.28025  | 144511.525  | 112                   | C <sub>19</sub> H <sub>43</sub> N <sub>4</sub> PS <sub>2</sub>                | [M + Acetate] <sup>–</sup> | –0.59                  |                                     | 0.44            | 0.3210          |
| 481.28025  | 144511.525  | 112                   | C <sub>24</sub> H <sub>38</sub> O <sub>6</sub>                                | [M + Acetate] <sup>–</sup> | –0.92                  |                                     | 0.51            | 0.2407          |
| 481.28025  | 144511.525  | 112                   | C <sub>31</sub> H <sub>43</sub> P                                             | [M + Cl] <sup>–</sup>      | 1.27                   |                                     | –0.56           | 0.1918          |
| 481.28025  | 144511.525  | 112                   | C <sub>21</sub> H <sub>42</sub> N <sub>4</sub> O <sub>6</sub>                 | [M + Cl] <sup>–</sup>      | 0.86                   |                                     | 0.77            | 0.0421          |
| 481.28025  | 144511.525  | 112                   | C <sub>16</sub> H <sub>39</sub> N <sub>12</sub> OP                            | [M + Cl] <sup>–</sup>      | 0.22                   |                                     | –0.26           | 0.6231          |
| 481.28025  | 144511.525  | 112                   | C <sub>23</sub> H <sub>49</sub> N <sub>2</sub> P <sub>3</sub>                 | [M + Cl] <sup>–</sup>      | –0.03                  |                                     | 0.82            | 0.0228          |
| 481.28025  | 144511.525  | 112                   | C <sub>22</sub> H <sub>46</sub> N <sub>4</sub> OS <sub>2</sub>                | [M + Cl] <sup>–</sup>      | –0.95                  |                                     | 0.89            | 0.0073          |
| 481.28025  | 144511.525  | 112                   | C <sub>20</sub> H <sub>43</sub> N <sub>4</sub> O <sub>7</sub> P               | [M – H] <sup>–</sup>       | 1.22                   |                                     | 0.61            | 0.1492          |
| 481.28025  | 144511.525  | 112                   | C <sub>15</sub> H <sub>40</sub> N <sub>12</sub> O <sub>2</sub> P <sub>2</sub> | [M – H] <sup>–</sup>       | 0.59                   |                                     | –0.60           | 0.2888          |
| 481.28025  | 144511.525  | 112                   | C <sub>22</sub> H <sub>50</sub> N <sub>2</sub> OP <sub>4</sub>                | [M – H] <sup>–</sup>       | 0.34                   |                                     | 0.89            | 0.0073          |
| 481.28025  | 144511.525  | 112                   | C <sub>21</sub> H <sub>47</sub> N <sub>4</sub> O <sub>2</sub> PS <sub>2</sub> | [M – H] <sup>–</sup>       | –0.59                  |                                     | 0.77            | 0.0421          |
| 481.28025  | 144511.525  | 112                   | C <sub>26</sub> H <sub>42</sub> O <sub>8</sub>                                | [M – H] <sup>–</sup>       | –0.92                  | [Fusicoccin H]                      | –0.08           | 0.8609          |
| 479.33838  | 20201.553   | 113                   | C <sub>26</sub> H <sub>44</sub> O <sub>4</sub>                                | [M + Acetate] <sup>–</sup> | 1.18                   | [6-Ethylchenodeoxycholic acid]      | 1.00            | 0.0000          |
| 479.33838  | 20201.553   | 113                   | C <sub>19</sub> H <sub>44</sub> N <sub>6</sub> O <sub>2</sub> S               | [M + Acetate] <sup>–</sup> | –0.25                  |                                     | –0.57           | 0.1100          |
| 479.33838  | 20201.553   | 113                   | C <sub>24</sub> H <sub>44</sub> N <sub>8</sub>                                | [M + Cl] <sup>–</sup>      | 0.18                   |                                     | 0.81            | 0.0025          |
| 479.33838  | 20201.553   | 113                   | C <sub>28</sub> H <sub>48</sub> O <sub>6</sub>                                | [M – H] <sup>–</sup>       | 1.18                   | [24-epi-Brassinolide, Brassinolide] | 0.77            | 0.0055          |
| 479.33838  | 20201.553   | 113                   | C <sub>23</sub> H <sub>45</sub> N <sub>8</sub> OP                             | [M – H] <sup>–</sup>       | 0.55                   |                                     | 0.62            | 0.0438          |
| 479.33838  | 20201.553   | 113                   | C <sub>21</sub> H <sub>48</sub> N <sub>6</sub> O <sub>4</sub> S               | [M – H] <sup>–</sup>       | –0.25                  |                                     | 0.19            | 0.5820          |

Table S1. Cont.

| <i>m/z</i> | Intensity   | ID SIP<br>(Figure S5) | Empirical formula<br>(all- <sup>12</sup> C containing<br>peak)                | Ion form                   | Mass<br>error<br>(ppm) | KEGG compound                                   | <i>r</i> -value | <i>p</i> -value |
|------------|-------------|-----------------------|-------------------------------------------------------------------------------|----------------------------|------------------------|-------------------------------------------------|-----------------|-----------------|
| 479.33838  | 20201.553   | 113                   | C <sub>29</sub> H <sub>52</sub> OS <sub>2</sub>                               | [M – H] <sup>–</sup>       | –0.63                  |                                                 | 0.54            | 0.0841          |
| 483.29577  | 39760.412   | 114                   | C <sub>18</sub> H <sub>41</sub> N <sub>4</sub> O <sub>5</sub> P               | [M + Acetate] <sup>–</sup> | 0.95                   |                                                 | –0.46           | 0.2481          |
| 483.29577  | 39760.412   | 114                   | C <sub>13</sub> H <sub>38</sub> N <sub>12</sub> P <sub>2</sub>                | [M + Acetate] <sup>–</sup> | 0.32                   |                                                 | –0.98           | 0.0244          |
| 483.29577  | 39760.412   | 114                   | C <sub>19</sub> H <sub>45</sub> N <sub>4</sub> PS <sub>2</sub>                | [M + Acetate] <sup>–</sup> | –0.85                  |                                                 | –0.24           | 0.5662          |
| 483.29577  | 39760.412   | 114                   | C <sub>24</sub> H <sub>40</sub> O <sub>6</sub>                                | [M + Acetate] <sup>–</sup> | –1.19                  | [alpha-Phocaecholic acid]                       | 0.93            | 0.0007          |
| 483.29577  | 39760.412   | 114                   | C <sub>31</sub> H <sub>45</sub> P                                             | [M + Cl] <sup>–</sup>      | 0.99                   |                                                 | 0.32            | 0.4346          |
| 483.29577  | 39760.412   | 114                   | C <sub>21</sub> H <sub>44</sub> N <sub>4</sub> O <sub>6</sub>                 | [M + Cl] <sup>–</sup>      | 0.58                   |                                                 | 0.39            | 0.3452          |
| 483.29577  | 39760.412   | 114                   | C <sub>16</sub> H <sub>41</sub> N <sub>12</sub> OP                            | [M + Cl] <sup>–</sup>      | –0.05                  |                                                 | –0.85           | 0.0161          |
| 483.29577  | 39760.412   | 114                   | C <sub>23</sub> H <sub>51</sub> N <sub>2</sub> P <sub>3</sub>                 | [M + Cl] <sup>–</sup>      | –0.3                   |                                                 | 0.92            | 0.0011          |
| 483.29577  | 39760.412   | 114                   | C <sub>22</sub> H <sub>48</sub> N <sub>4</sub> OS <sub>2</sub>                | [M + Cl] <sup>–</sup>      | –1.21                  |                                                 | 0.72            | 0.0426          |
| 483.29577  | 39760.412   | 114                   | C <sub>30</sub> H <sub>46</sub> OP <sub>2</sub>                               | [M – H] <sup>–</sup>       | 1.36                   |                                                 | 0.38            | 0.3566          |
| 483.29577  | 39760.412   | 114                   | C <sub>20</sub> H <sub>45</sub> N <sub>4</sub> O <sub>7</sub> P               | [M – H] <sup>–</sup>       | 0.95                   |                                                 | 0.04            | 0.9174          |
| 483.29577  | 39760.412   | 114                   | C <sub>15</sub> H <sub>42</sub> N <sub>12</sub> O <sub>2</sub> P <sub>2</sub> | [M – H] <sup>–</sup>       | 0.32                   |                                                 | –0.95           | 0.0041          |
| 483.29577  | 39760.412   | 114                   | C <sub>22</sub> H <sub>52</sub> N <sub>2</sub> OP <sub>4</sub>                | [M – H] <sup>–</sup>       | 0.06                   |                                                 | 0.72            | 0.0426          |
| 483.29577  | 39760.412   | 114                   | C <sub>21</sub> H <sub>49</sub> N <sub>4</sub> O <sub>2</sub> PS <sub>2</sub> | [M – H] <sup>–</sup>       | –0.85                  |                                                 | 0.39            | 0.3452          |
| 483.29577  | 39760.412   | 114                   | C <sub>26</sub> H <sub>44</sub> O <sub>8</sub>                                | [M – H] <sup>–</sup>       | –1.19                  |                                                 | 0.72            | 0.0428          |
| 511.39964  | 6149.618667 | 115                   | C <sub>25</sub> H <sub>56</sub> N <sub>4</sub> O <sub>4</sub>                 | [M + Cl] <sup>–</sup>      | 0.16                   |                                                 | 0.77            | 0.0241          |
| 511.39964  | 6149.618667 | 115                   | C <sub>27</sub> H <sub>48</sub> N <sub>10</sub>                               | [M – H] <sup>–</sup>       | 1.13                   |                                                 | 0.65            | 0.0789          |
| 511.39964  | 6149.618667 | 115                   | C <sub>19</sub> H <sub>54</sub> N <sub>12</sub> P <sub>2</sub>                | [M – H] <sup>–</sup>       | –0.09                  |                                                 | 0.58            | 0.1295          |
| 507.33228  | 7318.3336   | 116                   | C <sub>21</sub> H <sub>45</sub> N <sub>4</sub> O <sub>4</sub> P               | [M + Acetate] <sup>–</sup> | 1.15                   |                                                 | –0.44           | 0.2367          |
| 507.33228  | 7318.3336   | 116                   | C <sub>27</sub> H <sub>44</sub> O <sub>5</sub>                                | [M + Acetate] <sup>–</sup> | –0.88                  | [2-Deoxyecdysone, Convallagenin A, Digitogenin] | 0.86            | 0.0031          |
| 507.33228  | 7318.3336   | 116                   | C <sub>22</sub> H <sub>41</sub> N <sub>8</sub> P                              | [M + Acetate] <sup>–</sup> | –1.49                  |                                                 | –0.01           | 0.9713          |
| 507.33228  | 7318.3336   | 116                   | C <sub>24</sub> H <sub>48</sub> N <sub>4</sub> O <sub>5</sub>                 | [M + Cl] <sup>–</sup>      | 0.8                    |                                                 | 0.53            | 0.1447          |

Table S1. Cont.

| <i>m/z</i> | Intensity   | ID SIP<br>(Figure S5) | Empirical formula<br>(all- <sup>12</sup> C containing<br>peak)                | Ion form                   | Mass<br>error<br>(ppm) | KEGG compound      | <i>r</i> -value | <i>p</i> -value |
|------------|-------------|-----------------------|-------------------------------------------------------------------------------|----------------------------|------------------------|--------------------|-----------------|-----------------|
| 507.33228  | 7318.3336   | 116                   | C <sub>19</sub> H <sub>45</sub> N <sub>12</sub> P                             | [M + Cl] <sup>−</sup>      | 0.2                    |                    | −0.84           | 0.0189          |
| 507.33228  | 7318.3336   | 116                   | C <sub>25</sub> H <sub>52</sub> N <sub>4</sub> S <sub>2</sub>                 | [M + Cl] <sup>−</sup>      | −0.91                  |                    | 0.66            | 0.0507          |
| 507.33228  | 7318.3336   | 116                   | C <sub>23</sub> H <sub>49</sub> N <sub>4</sub> O <sub>6</sub> P               | [M − H] <sup>−</sup>       | 1.15                   |                    | 0.32            | 0.3979          |
| 507.33228  | 7318.3336   | 116                   | C <sub>18</sub> H <sub>46</sub> N <sub>12</sub> OP <sub>2</sub>               | [M − H] <sup>−</sup>       | 0.55                   |                    | −0.89           | 0.0180          |
| 507.33228  | 7318.3336   | 116                   | C <sub>25</sub> H <sub>56</sub> N <sub>2</sub> P <sub>4</sub>                 | [M − H] <sup>−</sup>       | 0.31                   |                    | 0.66            | 0.0507          |
| 507.33228  | 7318.3336   | 116                   | C <sub>24</sub> H <sub>53</sub> N <sub>4</sub> OPS <sub>2</sub>               | [M − H] <sup>−</sup>       | −0.56                  |                    | 0.53            | 0.1447          |
| 507.33228  | 7318.3336   | 116                   | C <sub>29</sub> H <sub>48</sub> O <sub>7</sub>                                | [M − H] <sup>−</sup>       | −0.88                  |                    | 0.97            | 0.0000          |
| 507.33228  | 7318.3336   | 116                   | C <sub>24</sub> H <sub>45</sub> N <sub>8</sub> O <sub>2</sub> P               | [M − H] <sup>−</sup>       | −1.49                  |                    | 0.53            | 0.1447          |
| 515.35882  | 83953.423   | 117                   | C <sub>15</sub> H <sub>46</sub> N <sub>12</sub> P <sub>2</sub>                | [M + Acetate] <sup>−</sup> | 1.17                   |                    | 0.76            | 0.0784          |
| 515.35882  | 83953.423   | 117                   | C <sub>26</sub> H <sub>48</sub> O <sub>6</sub>                                | [M + Acetate] <sup>−</sup> | −0.24                  |                    | −0.65           | 0.1581          |
| 515.35882  | 83953.423   | 117                   | C <sub>21</sub> H <sub>45</sub> N <sub>8</sub> OP                             | [M + Acetate] <sup>−</sup> | −0.83                  |                    | −0.47           | 0.3466          |
| 515.35882  | 83953.423   | 117                   | C <sub>23</sub> H <sub>52</sub> N <sub>4</sub> O <sub>6</sub>                 | [M + Cl] <sup>−</sup>      | 1.42                   |                    | −0.59           | 0.2216          |
| 515.35882  | 83953.423   | 117                   | C <sub>18</sub> H <sub>49</sub> N <sub>12</sub> OP                            | [M + Cl] <sup>−</sup>      | 0.83                   |                    | 0.17            | 0.7405          |
| 515.35882  | 83953.423   | 117                   | C <sub>24</sub> H <sub>48</sub> N <sub>8</sub> O <sub>2</sub>                 | [M + Cl] <sup>−</sup>      | −1.17                  |                    | −0.62           | 0.1917          |
| 515.35882  | 83953.423   | 117                   | C <sub>17</sub> H <sub>50</sub> N <sub>12</sub> O <sub>2</sub> P <sub>2</sub> | [M − H] <sup>−</sup>       | 1.17                   |                    | 0.61            | 0.2026          |
| 515.35882  | 83953.423   | 117                   | C <sub>28</sub> H <sub>52</sub> O <sub>8</sub>                                | [M − H] <sup>−</sup>       | −0.24                  |                    | −0.67           | 0.1414          |
| 515.35882  | 83953.423   | 117                   | C <sub>23</sub> H <sub>49</sub> N <sub>8</sub> O <sub>3</sub> P               | [M − H] <sup>−</sup>       | −0.83                  |                    | −0.59           | 0.2216          |
| 515.35882  | 83953.423   | 117                   | C <sub>31</sub> H <sub>53</sub> N <sub>2</sub> PS                             | [M − H] <sup>−</sup>       | −1.19                  |                    | −0.69           | 0.1299          |
| 509.38446  | 9373.352833 | 118                   | C <sub>22</sub> H <sub>51</sub> N <sub>4</sub> O <sub>3</sub> P               | [M + Acetate] <sup>−</sup> | 1.43                   |                    | 0.38            | 0.1850          |
| 509.38446  | 9373.352833 | 118                   | C <sub>28</sub> H <sub>50</sub> O <sub>4</sub>                                | [M + Acetate] <sup>−</sup> | −0.6                   | [6-Deoxocasterone] | 0.93            | 0.0000          |
| 509.38446  | 9373.352833 | 118                   | C <sub>25</sub> H <sub>54</sub> N <sub>4</sub> O <sub>4</sub>                 | [M + Cl] <sup>−</sup>      | 1.08                   |                    | 0.91            | 0.0000          |
| 509.38446  | 9373.352833 | 118                   | C <sub>24</sub> H <sub>55</sub> N <sub>4</sub> O <sub>5</sub> P               | [M − H] <sup>−</sup>       | 1.43                   |                    | 0.77            | 0.0012          |

Table S1. Cont.

| <i>m/z</i>             | Intensity   | ID SIP<br>(Figure S5) | Empirical formula<br>(all- <sup>12</sup> C containing<br>peak)                              | Ion form                   | Mass<br>error<br>(ppm) | KEGG compound | <i>r</i> -value | <i>p</i> -value |
|------------------------|-------------|-----------------------|---------------------------------------------------------------------------------------------|----------------------------|------------------------|---------------|-----------------|-----------------|
| 509.38 <sub>44</sub> 6 | 9373.352833 | 118                   | C <sub>19</sub> H <sub>52</sub> N <sub>12</sub> P <sub>2</sub>                              | [M – H] <sup>–</sup>       | 0.83                   |               | –0.57           | 0.0662          |
| 509.38 <sub>44</sub> 6 | 9373.352833 | 118                   | C <sub>30</sub> H <sub>54</sub> O <sub>6</sub>                                              | [M – H] <sup>–</sup>       | –0.6                   |               | 0.64            | 0.0129          |
| 509.38 <sub>44</sub> 6 | 9373.352833 | 118                   | C <sub>25</sub> H <sub>51</sub> N <sub>8</sub> OP                                           | [M – H] <sup>–</sup>       | –1.19                  |               | 0.91            | 0.0000          |
| 519.15505              | 67172.39333 | 119                   | C <sub>7</sub> H <sub>21</sub> N <sub>14</sub> O <sub>8</sub> P                             | [M + Acetate] <sup>–</sup> | 1.45                   |               | 0.00            | 1.0000          |
| 519.15505              | 67172.39333 | 119                   | C <sub>14</sub> H <sub>31</sub> N <sub>4</sub> O <sub>7</sub> P <sub>3</sub>                | [M + Acetate] <sup>–</sup> | 1.22                   |               | 0.50            | 0.2049          |
| 519.15505              | 67172.39333 | 119                   | C <sub>15</sub> H <sub>25</sub> N <sub>8</sub> O <sub>5</sub> PS                            | [M + Acetate] <sup>–</sup> | 1.1                    |               | 0.82            | 0.0067          |
| 519.15505              | 67172.39333 | 119                   | C <sub>23</sub> H <sub>29</sub> N <sub>2</sub> O <sub>2</sub> PS <sub>2</sub>               | [M + Acetate] <sup>–</sup> | 0.74                   |               | –0.46           | 0.1854          |
| 519.15505              | 67172.39333 | 119                   | C <sub>5</sub> H <sub>24</sub> N <sub>12</sub> O <sub>11</sub> S                            | [M + Acetate] <sup>–</sup> | 0.72                   |               | 0.00            | 1.0000          |
| 519.15505              | 67172.39333 | 119                   | C <sub>9</sub> H <sub>28</sub> N <sub>12</sub> O <sub>2</sub> P <sub>4</sub>                | [M + Acetate] <sup>–</sup> | 0.63                   |               | –0.96           | 0.1870          |
| 519.15505              | 67172.39333 | 119                   | C <sub>16</sub> H <sub>38</sub> N <sub>2</sub> OP <sub>6</sub>                              | [M + Acetate] <sup>–</sup> | 0.4                    |               | 0.96            | 0.0000          |
| 519.15505              | 67172.39333 | 119                   | C <sub>13</sub> H <sub>28</sub> N <sub>6</sub> O <sub>8</sub> S <sub>2</sub>                | [M + Acetate] <sup>–</sup> | 0.36                   |               | 0.01            | 0.9802          |
| 519.15505              | 67172.39333 | 119                   | C <sub>21</sub> H <sub>32</sub> O <sub>5</sub> S <sub>3</sub>                               | [M + Acetate] <sup>–</sup> | 0.01                   |               | 0.04            | 0.9092          |
| 519.15505              | 67172.39333 | 119                   | C <sub>23</sub> H <sub>21</sub> N <sub>6</sub> O <sub>3</sub> P                             | [M + Acetate] <sup>–</sup> | –0.16                  |               | –0.46           | 0.1854          |
| 519.15505              | 67172.39333 | 119                   | C <sub>8</sub> H <sub>25</sub> N <sub>14</sub> O <sub>3</sub> PS <sub>2</sub>               | [M + Acetate] <sup>–</sup> | –0.22                  |               | 0.00            | 1.0000          |
| 519.15505              | 67172.39333 | 119                   | C <sub>15</sub> H <sub>35</sub> N <sub>4</sub> O <sub>2</sub> P <sub>3</sub> S <sub>2</sub> | [M + Acetate] <sup>–</sup> | –0.46                  |               | 0.82            | 0.0067          |
| 519.15505              | 67172.39333 | 119                   | C <sub>31</sub> H <sub>25</sub> PS                                                          | [M + Acetate] <sup>–</sup> | –0.51                  |               | –0.80           | 0.0052          |
| 519.15505              | 67172.39333 | 119                   | C <sub>13</sub> H <sub>20</sub> N <sub>10</sub> O <sub>9</sub>                              | [M + Acetate] <sup>–</sup> | –0.54                  |               | 0.01            | 0.9802          |
| 519.15505              | 67172.39333 | 119                   | C <sub>16</sub> H <sub>29</sub> N <sub>8</sub> PS <sub>3</sub>                              | [M + Acetate] <sup>–</sup> | –0.58                  |               | 0.96            | 0.0000          |
| 519.15505              | 67172.39333 | 119                   | C <sub>20</sub> H <sub>30</sub> O <sub>8</sub> P <sub>2</sub>                               | [M + Acetate] <sup>–</sup> | –0.77                  |               | 0.36            | 0.3028          |
| 519.15505              | 67172.39333 | 119                   | C <sub>21</sub> H <sub>24</sub> N <sub>4</sub> O <sub>6</sub> S                             | [M + Acetate] <sup>–</sup> | –0.89                  |               | 0.04            | 0.9092          |
| 519.15505              | 67172.39333 | 119                   | C <sub>14</sub> H <sub>32</sub> N <sub>6</sub> O <sub>3</sub> S <sub>4</sub>                | [M + Acetate] <sup>–</sup> | –1.31                  |               | 0.50            | 0.2049          |
| 519.15505              | 67172.39333 | 119                   | C <sub>15</sub> H <sub>27</sub> N <sub>8</sub> O <sub>3</sub> P <sub>3</sub>                | [M + Acetate] <sup>–</sup> | –1.36                  |               | 0.82            | 0.0067          |
| 519.15505              | 67172.39333 | 119                   | C <sub>16</sub> H <sub>21</sub> N <sub>12</sub> OPS                                         | [M + Acetate] <sup>–</sup> | –1.48                  |               | 0.96            | 0.0000          |

Table S1. Cont.

| <i>m/z</i> | Intensity   | ID SIP<br>(Figure S5) | Empirical formula<br>(all- <sup>12</sup> C containing<br>peak)                              | Ion form              | Mass<br>error<br>(ppm) | KEGG compound | <i>r</i> -value | <i>p</i> -value |
|------------|-------------|-----------------------|---------------------------------------------------------------------------------------------|-----------------------|------------------------|---------------|-----------------|-----------------|
| 519.15505  | 67172.39333 | 119                   | C <sub>20</sub> H <sub>25</sub> N <sub>10</sub> O <sub>3</sub> P                            | [M + Cl] <sup>-</sup> | 1.49                   |               | 0.36            | 0.3028          |
| 519.15505  | 67172.39333 | 119                   | C <sub>27</sub> H <sub>35</sub> O <sub>2</sub> P <sub>3</sub>                               | [M + Cl] <sup>-</sup> | 1.26                   |               | -0.78           | 0.0075          |
| 519.15505  | 67172.39333 | 119                   | C <sub>28</sub> H <sub>29</sub> N <sub>4</sub> PS                                           | [M + Cl] <sup>-</sup> | 1.14                   |               | -0.80           | 0.0056          |
| 519.15505  | 67172.39333 | 119                   | C <sub>10</sub> H <sub>24</sub> N <sub>14</sub> O <sub>9</sub>                              | [M + Cl] <sup>-</sup> | 1.11                   |               | -0.92           | 0.0780          |
| 519.15505  | 67172.39333 | 119                   | C <sub>13</sub> H <sub>33</sub> N <sub>12</sub> PS <sub>3</sub>                             | [M + Cl] <sup>-</sup> | 1.07                   |               | 0.01            | 0.9802          |
| 519.15505  | 67172.39333 | 119                   | C <sub>17</sub> H <sub>34</sub> N <sub>4</sub> O <sub>8</sub> P <sub>2</sub>                | [M + Cl] <sup>-</sup> | 0.88                   |               | 0.97            | 0.0000          |
| 519.15505  | 67172.39333 | 119                   | C <sub>18</sub> H <sub>28</sub> N <sub>8</sub> O <sub>6</sub> S                             | [M + Cl] <sup>-</sup> | 0.76                   |               | 0.87            | 0.0010          |
| 519.15505  | 67172.39333 | 119                   | C <sub>26</sub> H <sub>32</sub> N <sub>2</sub> O <sub>3</sub> S <sub>2</sub>                | [M + Cl] <sup>-</sup> | 0.41                   |               | -0.75           | 0.0125          |
| 519.15505  | 67172.39333 | 119                   | C <sub>12</sub> H <sub>31</sub> N <sub>12</sub> O <sub>3</sub> P <sub>3</sub>               | [M + Cl] <sup>-</sup> | 0.29                   |               | -0.54           | 0.2658          |
| 519.15505  | 67172.39333 | 119                   | C <sub>19</sub> H <sub>41</sub> N <sub>2</sub> O <sub>2</sub> P <sub>5</sub>                | [M + Cl] <sup>-</sup> | 0.06                   |               | 0.66            | 0.0379          |
| 519.15505  | 67172.39333 | 119                   | C <sub>19</sub> H <sub>40</sub> N <sub>4</sub> S <sub>5</sub>                               | [M + Cl] <sup>-</sup> | -0.01                  |               | 0.66            | 0.0379          |
| 519.15505  | 67172.39333 | 119                   | C <sub>20</sub> H <sub>35</sub> N <sub>6</sub> P <sub>3</sub> S                             | [M + Cl] <sup>-</sup> | -0.06                  |               | 0.36            | 0.3028          |
| 519.15505  | 67172.39333 | 119                   | C <sub>10</sub> H <sub>34</sub> N <sub>10</sub> O <sub>6</sub> P <sub>2</sub> S             | [M + Cl] <sup>-</sup> | -0.44                  |               | -0.92           | 0.0780          |
| 519.15505  | 67172.39333 | 119                   | C <sub>26</sub> H <sub>24</sub> N <sub>6</sub> O <sub>4</sub>                               | [M + Cl] <sup>-</sup> | -0.49                  |               | -0.75           | 0.0125          |
| 519.15505  | 67172.39333 | 119                   | C <sub>11</sub> H <sub>28</sub> N <sub>14</sub> O <sub>4</sub> S <sub>2</sub>               | [M + Cl] <sup>-</sup> | -0.56                  |               | -0.84           | 0.0731          |
| 519.15505  | 67172.39333 | 119                   | C <sub>18</sub> H <sub>38</sub> N <sub>4</sub> O <sub>3</sub> P <sub>2</sub> S <sub>2</sub> | [M + Cl] <sup>-</sup> | -0.79                  |               | 0.87            | 0.0010          |
| 519.15505  | 67172.39333 | 119                   | C <sub>34</sub> H <sub>28</sub> OS                                                          | [M + Cl] <sup>-</sup> | -0.84                  |               | -0.78           | 0.0074          |
| 519.15505  | 67172.39333 | 119                   | C <sub>19</sub> H <sub>32</sub> N <sub>8</sub> OS <sub>3</sub>                              | [M + Cl] <sup>-</sup> | -0.91                  |               | 0.66            | 0.0379          |
| 519.15505  | 67172.39333 | 119                   | C <sub>23</sub> H <sub>33</sub> O <sub>9</sub> P                                            | [M + Cl] <sup>-</sup> | -1.11                  |               | -0.46           | 0.1854          |
| 519.15505  | 67172.39333 | 119                   | C <sub>13</sub> H <sub>32</sub> N <sub>4</sub> O <sub>15</sub>                              | [M + Cl] <sup>-</sup> | -1.49                  |               | 0.01            | 0.9802          |
| 519.15505  | 67172.39333 | 119                   | C <sub>27</sub> H <sub>30</sub> N <sub>4</sub> OP <sub>2</sub> S                            | [M - H] <sup>-</sup>  | 1.48                   |               | -0.78           | 0.0075          |
| 519.15505  | 67172.39333 | 119                   | C <sub>9</sub> H <sub>25</sub> N <sub>14</sub> O <sub>10</sub> P                            | [M - H] <sup>-</sup>  | 1.45                   |               | -0.96           | 0.1870          |
| 519.15505  | 67172.39333 | 119                   | C <sub>12</sub> H <sub>34</sub> N <sub>12</sub> OP <sub>2</sub> S <sub>3</sub>              | [M - H] <sup>-</sup>  | 1.41                   |               | -0.54           | 0.2658          |

Table S1. Cont.

| <i>m/z</i> | Intensity   | ID SIP<br>(Figure S5) | Empirical formula<br>(all- <sup>12</sup> C containing<br>peak)                              | Ion form             | Mass<br>error<br>(ppm) | KEGG compound | <i>r</i> -value | <i>p</i> -value |
|------------|-------------|-----------------------|---------------------------------------------------------------------------------------------|----------------------|------------------------|---------------|-----------------|-----------------|
| 519.15505  | 67172.39333 | 119                   | C <sub>16</sub> H <sub>35</sub> N <sub>4</sub> O <sub>9</sub> P <sub>3</sub>                | [M - H] <sup>-</sup> | 1.22                   |               | 0.96            | 0.0000          |
| 519.15505  | 67172.39333 | 119                   | C <sub>19</sub> H <sub>44</sub> N <sub>2</sub> P <sub>4</sub> S <sub>3</sub>                | [M - H] <sup>-</sup> | 1.18                   |               | 0.66            | 0.0379          |
| 519.15505  | 67172.39333 | 119                   | C <sub>17</sub> H <sub>29</sub> N <sub>8</sub> O <sub>7</sub> PS                            | [M - H] <sup>-</sup> | 1.1                    |               | 0.97            | 0.0000          |
| 519.15505  | 67172.39333 | 119                   | C <sub>25</sub> H <sub>33</sub> N <sub>2</sub> O <sub>4</sub> PS <sub>2</sub>               | [M - H] <sup>-</sup> | 0.74                   |               | -0.69           | 0.0260          |
| 519.15505  | 67172.39333 | 119                   | C <sub>7</sub> H <sub>28</sub> N <sub>12</sub> O <sub>13</sub> S                            | [M - H] <sup>-</sup> | 0.72                   |               | 0.00            | 1.0000          |
| 519.15505  | 67172.39333 | 119                   | C <sub>11</sub> H <sub>32</sub> N <sub>12</sub> O <sub>4</sub> P <sub>4</sub>               | [M - H] <sup>-</sup> | 0.63                   |               | -0.84           | 0.0731          |
| 519.15505  | 67172.39333 | 119                   | C <sub>28</sub> H <sub>16</sub> N <sub>12</sub>                                             | [M - H] <sup>-</sup> | 0.46                   |               | -0.80           | 0.0056          |
| 519.15505  | 67172.39333 | 119                   | C <sub>18</sub> H <sub>42</sub> N <sub>2</sub> O <sub>3</sub> P <sub>6</sub>                | [M - H] <sup>-</sup> | 0.4                    |               | 0.87            | 0.0010          |
| 519.15505  | 67172.39333 | 119                   | C <sub>15</sub> H <sub>32</sub> N <sub>6</sub> O <sub>10</sub> S <sub>2</sub>               | [M - H] <sup>-</sup> | 0.36                   |               | 0.82            | 0.0067          |
| 519.15505  | 67172.39333 | 119                   | C <sub>18</sub> H <sub>41</sub> N <sub>4</sub> OPS <sub>5</sub>                             | [M - H] <sup>-</sup> | 0.32                   |               | 0.87            | 0.0010          |
| 519.15505  | 67172.39333 | 119                   | C <sub>19</sub> H <sub>36</sub> N <sub>6</sub> OP <sub>4</sub> S                            | [M - H] <sup>-</sup> | 0.28                   |               | 0.66            | 0.0379          |
| 519.15505  | 67172.39333 | 119                   | C <sub>23</sub> H <sub>36</sub> O <sub>7</sub> S <sub>3</sub>                               | [M - H] <sup>-</sup> | 0.01                   |               | -0.46           | 0.1854          |
| 519.15505  | 67172.39333 | 119                   | C <sub>25</sub> H <sub>25</sub> N <sub>6</sub> O <sub>5</sub> P                             | [M - H] <sup>-</sup> | -0.16                  |               | -0.69           | 0.0260          |
| 519.15505  | 67172.39333 | 119                   | C <sub>10</sub> H <sub>29</sub> N <sub>14</sub> O <sub>5</sub> PS <sub>2</sub>              | [M - H] <sup>-</sup> | -0.22                  |               | -0.92           | 0.0780          |
| 519.15505  | 67172.39333 | 119                   | C <sub>17</sub> H <sub>39</sub> N <sub>4</sub> O <sub>4</sub> P <sub>3</sub> S <sub>2</sub> | [M - H] <sup>-</sup> | -0.46                  |               | 0.97            | 0.0000          |
| 519.15505  | 67172.39333 | 119                   | C <sub>33</sub> H <sub>29</sub> O <sub>2</sub> PS                                           | [M - H] <sup>-</sup> | -0.51                  |               | -0.79           | 0.0065          |
| 519.15505  | 67172.39333 | 119                   | C <sub>15</sub> H <sub>24</sub> N <sub>10</sub> O <sub>11</sub>                             | [M - H] <sup>-</sup> | -0.54                  |               | 0.82            | 0.0067          |
| 519.15505  | 67172.39333 | 119                   | C <sub>18</sub> H <sub>33</sub> N <sub>8</sub> O <sub>2</sub> PS <sub>3</sub>               | [M - H] <sup>-</sup> | -0.58                  |               | 0.87            | 0.0010          |
| 519.15505  | 67172.39333 | 119                   | C <sub>20</sub> H <sub>22</sub> N <sub>14</sub> P <sub>2</sub>                              | [M - H] <sup>-</sup> | -0.74                  |               | 0.36            | 0.3028          |
| 519.15505  | 67172.39333 | 119                   | C <sub>22</sub> H <sub>34</sub> O <sub>10</sub> P <sub>2</sub>                              | [M - H] <sup>-</sup> | -0.77                  |               | -0.24           | 0.5009          |
| 519.15505  | 67172.39333 | 119                   | C <sub>23</sub> H <sub>28</sub> N <sub>4</sub> O <sub>8</sub> S                             | [M - H] <sup>-</sup> | -0.89                  |               | -0.46           | 0.1854          |
| 519.15505  | 67172.39333 | 119                   | C <sub>16</sub> H <sub>36</sub> N <sub>6</sub> O <sub>5</sub> S <sub>4</sub>                | [M - H] <sup>-</sup> | -1.31                  |               | 0.96            | 0.0000          |
| 519.15505  | 67172.39333 | 119                   | C <sub>17</sub> H <sub>31</sub> N <sub>8</sub> O <sub>5</sub> P <sub>3</sub>                | [M - H] <sup>-</sup> | -1.36                  |               | 0.97            | 0.0000          |

Table S1. Cont.

| <i>m/z</i> | Intensity   | ID SIP<br>(Figure S5) | Empirical formula<br>(all- <sup>12</sup> C containing<br>peak)                              | Ion form                   | Mass<br>error<br>(ppm) | KEGG compound | <i>r</i> -value | <i>p</i> -value |
|------------|-------------|-----------------------|---------------------------------------------------------------------------------------------|----------------------------|------------------------|---------------|-----------------|-----------------|
| 519.15505  | 67172.39333 | 119                   | C <sub>18</sub> H <sub>25</sub> N <sub>12</sub> O <sub>3</sub> PS                           | [M – H] <sup>–</sup>       | –1.48                  |               | 0.87            | 0.0010          |
| 521.15192  | 38452.1225  | 120                   | C <sub>17</sub> H <sub>14</sub> N <sub>14</sub> O <sub>3</sub>                              | [M + Acetate] <sup>–</sup> | 1.41                   |               | 0.81            | 0.0082          |
| 521.15192  | 38452.1225  | 120                   | C <sub>19</sub> H <sub>26</sub> O <sub>13</sub>                                             | [M + Acetate] <sup>–</sup> | 1.38                   |               | 0.56            | 0.1172          |
| 521.15192  | 38452.1225  | 120                   | C <sub>24</sub> H <sub>24</sub> N <sub>4</sub> O <sub>2</sub> P <sub>2</sub>                | [M + Acetate] <sup>–</sup> | 1.18                   |               | 0.22            | 0.5747          |
| 521.15192  | 38452.1225  | 120                   | C <sub>9</sub> H <sub>28</sub> N <sub>12</sub> O <sub>2</sub> P <sub>2</sub> S <sub>2</sub> | [M + Acetate] <sup>–</sup> | 1.11                   |               | –0.38           | 0.4569          |
| 521.15192  | 38452.1225  | 120                   | C <sub>25</sub> H <sub>18</sub> N <sub>8</sub> S                                            | [M + Acetate] <sup>–</sup> | 1.06                   |               | 0.18            | 0.6405          |
| 521.15192  | 38452.1225  | 120                   | C <sub>16</sub> H <sub>38</sub> N <sub>2</sub> OP <sub>4</sub> S <sub>2</sub>               | [M + Acetate] <sup>–</sup> | 0.88                   |               | 0.93            | 0.0003          |
| 521.15192  | 38452.1225  | 120                   | C <sub>14</sub> H <sub>23</sub> N <sub>8</sub> O <sub>8</sub> P                             | [M + Acetate] <sup>–</sup> | 0.8                    |               | 0.93            | 0.0003          |
| 521.15192  | 38452.1225  | 120                   | C <sub>22</sub> H <sub>27</sub> N <sub>2</sub> O <sub>5</sub> PS                            | [M + Acetate] <sup>–</sup> | 0.45                   |               | 0.31            | 0.4111          |
| 521.15192  | 38452.1225  | 120                   | C <sub>12</sub> H <sub>26</sub> N <sub>6</sub> O <sub>11</sub> S                            | [M + Acetate] <sup>–</sup> | 0.07                   |               | 0.43            | 0.2463          |
| 521.15192  | 38452.1225  | 120                   | C <sub>15</sub> H <sub>35</sub> N <sub>4</sub> O <sub>2</sub> PS <sub>4</sub>               | [M + Acetate] <sup>–</sup> | 0.03                   |               | 0.99            | 0.0000          |
| 521.15192  | 38452.1225  | 120                   | C <sub>16</sub> H <sub>30</sub> N <sub>6</sub> O <sub>2</sub> P <sub>4</sub>                | [M + Acetate] <sup>–</sup> | –0.02                  |               | 0.93            | 0.0003          |
| 521.15192  | 38452.1225  | 120                   | C <sub>17</sub> H <sub>24</sub> N <sub>10</sub> P <sub>2</sub> S                            | [M + Acetate] <sup>–</sup> | –0.14                  |               | 0.81            | 0.0082          |
| 521.15192  | 38452.1225  | 120                   | C <sub>20</sub> H <sub>30</sub> O <sub>8</sub> S <sub>2</sub>                               | [M + Acetate] <sup>–</sup> | –0.28                  |               | 0.46            | 0.2126          |
| 521.15192  | 38452.1225  | 120                   | C <sub>7</sub> H <sub>23</sub> N <sub>14</sub> O <sub>6</sub> PS                            | [M + Acetate] <sup>–</sup> | –0.52                  |               | –0.46           | 0.5409          |
| 521.15192  | 38452.1225  | 120                   | C <sub>14</sub> H <sub>33</sub> N <sub>4</sub> O <sub>5</sub> P <sub>3</sub> S              | [M + Acetate] <sup>–</sup> | –0.75                  |               | 0.93            | 0.0003          |
| 521.15192  | 38452.1225  | 120                   | C <sub>30</sub> H <sub>23</sub> O <sub>3</sub> P                                            | [M + Acetate] <sup>–</sup> | –0.8                   |               | 0.07            | 0.8539          |
| 521.15192  | 38452.1225  | 120                   | C <sub>15</sub> H <sub>27</sub> N <sub>8</sub> O <sub>3</sub> PS <sub>2</sub>               | [M + Acetate] <sup>–</sup> | –0.87                  |               | 0.99            | 0.0000          |
| 521.15192  | 38452.1225  | 120                   | C <sub>20</sub> H <sub>22</sub> N <sub>4</sub> O <sub>9</sub>                               | [M + Acetate] <sup>–</sup> | –1.18                  |               | 0.46            | 0.2126          |
| 521.15192  | 38452.1225  | 120                   | C <sub>23</sub> H <sub>31</sub> N <sub>2</sub> PS <sub>3</sub>                              | [M + Acetate] <sup>–</sup> | –1.22                  |               | 0.26            | 0.4984          |
| 521.15192  | 38452.1225  | 120                   | C <sub>9</sub> H <sub>30</sub> N <sub>12</sub> P <sub>4</sub> S                             | [M + Acetate] <sup>–</sup> | –1.33                  |               | –0.38           | 0.4569          |
| 521.15192  | 38452.1225  | 120                   | C <sub>20</sub> H <sub>44</sub> OP <sub>6</sub>                                             | [M + Cl] <sup>–</sup>      | 1.39                   |               | 0.46            | 0.2126          |
| 521.15192  | 38452.1225  | 120                   | C <sub>17</sub> H <sub>34</sub> N <sub>4</sub> O <sub>8</sub> S <sub>2</sub>                | [M + Cl] <sup>–</sup>      | 1.36                   |               | 0.81            | 0.0082          |

Table S1. Cont.

| <i>m/z</i> | Intensity  | ID SIP<br>(Figure S5) | Empirical formula<br>(all- <sup>12</sup> C containing<br>peak)                               | Ion form              | Mass<br>error<br>(ppm) | KEGG compound | <i>r</i> -value | <i>p</i> -value |
|------------|------------|-----------------------|----------------------------------------------------------------------------------------------|-----------------------|------------------------|---------------|-----------------|-----------------|
| 521.15192  | 38452.1225 | 120                   | C <sub>27</sub> H <sub>27</sub> N <sub>4</sub> O <sub>3</sub> P                              | [M + Cl] <sup>-</sup> | 0.84                   |               | 0.13            | 0.7453          |
| 521.15192  | 38452.1225 | 120                   | C <sub>12</sub> H <sub>31</sub> N <sub>12</sub> O <sub>3</sub> PS <sub>2</sub>               | [M + Cl] <sup>-</sup> | 0.77                   |               | 0.43            | 0.2463          |
| 521.15192  | 38452.1225 | 120                   | C <sub>19</sub> H <sub>41</sub> N <sub>2</sub> O <sub>2</sub> P <sub>3</sub> S <sub>2</sub>  | [M + Cl] <sup>-</sup> | 0.54                   |               | 0.56            | 0.1172          |
| 521.15192  | 38452.1225 | 120                   | C <sub>17</sub> H <sub>26</sub> N <sub>8</sub> O <sub>9</sub>                                | [M + Cl] <sup>-</sup> | 0.46                   |               | 0.81            | 0.0082          |
| 521.15192  | 38452.1225 | 120                   | C <sub>20</sub> H <sub>35</sub> N <sub>6</sub> PS <sub>3</sub>                               | [M + Cl] <sup>-</sup> | 0.42                   |               | 0.46            | 0.2126          |
| 521.15192  | 38452.1225 | 120                   | C <sub>25</sub> H <sub>30</sub> N <sub>2</sub> O <sub>6</sub> S                              | [M + Cl] <sup>-</sup> | 0.11                   |               | 0.18            | 0.6405          |
| 521.15192  | 38452.1225 | 120                   | C <sub>18</sub> H <sub>38</sub> N <sub>4</sub> O <sub>3</sub> S <sub>4</sub>                 | [M + Cl] <sup>-</sup> | -0.31                  |               | 0.68            | 0.0446          |
| 521.15192  | 38452.1225 | 120                   | C <sub>19</sub> H <sub>33</sub> N <sub>6</sub> O <sub>3</sub> P <sub>3</sub>                 | [M + Cl] <sup>-</sup> | -0.35                  |               | 0.56            | 0.1172          |
| 521.15192  | 38452.1225 | 120                   | C <sub>20</sub> H <sub>27</sub> N <sub>10</sub> OPS                                          | [M + Cl] <sup>-</sup> | -0.47                  |               | 0.46            | 0.2126          |
| 521.15192  | 38452.1225 | 120                   | C <sub>27</sub> H <sub>37</sub> P <sub>3</sub> S                                             | [M + Cl] <sup>-</sup> | -0.71                  |               | 0.13            | 0.7453          |
| 521.15192  | 38452.1225 | 120                   | C <sub>9</sub> H <sub>32</sub> N <sub>10</sub> O <sub>9</sub> P <sub>2</sub>                 | [M + Cl] <sup>-</sup> | -0.73                  |               | -0.38           | 0.4569          |
| 521.15192  | 38452.1225 | 120                   | C <sub>10</sub> H <sub>26</sub> N <sub>14</sub> O <sub>7</sub> S                             | [M + Cl] <sup>-</sup> | -0.85                  |               | -0.21           | 0.6439          |
| 521.15192  | 38452.1225 | 120                   | C <sub>17</sub> H <sub>36</sub> N <sub>4</sub> O <sub>6</sub> P <sub>2</sub> S               | [M + Cl] <sup>-</sup> | -1.09                  |               | 0.81            | 0.0082          |
| 521.15192  | 38452.1225 | 120                   | C <sub>33</sub> H <sub>26</sub> O <sub>4</sub>                                               | [M + Cl] <sup>-</sup> | -1.14                  |               | 0.04            | 0.9258          |
| 521.15192  | 38452.1225 | 120                   | C <sub>18</sub> H <sub>30</sub> N <sub>8</sub> O <sub>4</sub> S <sub>2</sub>                 | [M + Cl] <sup>-</sup> | -1.2                   |               | 0.68            | 0.0446          |
| 521.15192  | 38452.1225 | 120                   | C <sub>19</sub> H <sub>18</sub> N <sub>14</sub> O <sub>5</sub>                               | [M - H] <sup>-</sup>  | 1.41                   |               | 0.56            | 0.1172          |
| 521.15192  | 38452.1225 | 120                   | C <sub>21</sub> H <sub>30</sub> O <sub>15</sub>                                              | [M - H] <sup>-</sup>  | 1.38                   |               | 0.38            | 0.3142          |
| 521.15192  | 38452.1225 | 120                   | C <sub>26</sub> H <sub>28</sub> N <sub>4</sub> O <sub>4</sub> P <sub>2</sub>                 | [M - H] <sup>-</sup>  | 1.18                   |               | 0.15            | 0.6969          |
| 521.15192  | 38452.1225 | 120                   | C <sub>11</sub> H <sub>32</sub> N <sub>12</sub> O <sub>4</sub> P <sub>2</sub> S <sub>2</sub> | [M - H] <sup>-</sup>  | 1.11                   |               | 0.07            | 0.8741          |
| 521.15192  | 38452.1225 | 120                   | C <sub>27</sub> H <sub>22</sub> N <sub>8</sub> O <sub>2</sub> S                              | [M - H] <sup>-</sup>  | 1.06                   |               | 0.13            | 0.7453          |
| 521.15192  | 38452.1225 | 120                   | C <sub>18</sub> H <sub>42</sub> N <sub>2</sub> O <sub>3</sub> P <sub>4</sub> S <sub>2</sub>  | [M - H] <sup>-</sup>  | 0.88                   |               | 0.68            | 0.0446          |
| 521.15192  | 38452.1225 | 120                   | C <sub>16</sub> H <sub>27</sub> N <sub>8</sub> O <sub>10</sub> P                             | [M - H] <sup>-</sup>  | 0.8                    |               | 0.93            | 0.0003          |
| 521.15192  | 38452.1225 | 120                   | C <sub>19</sub> H <sub>36</sub> N <sub>6</sub> OP <sub>2</sub> S <sub>3</sub>                | [M - H] <sup>-</sup>  | 0.76                   |               | 0.56            | 0.1172          |



Table S1. Cont.

| <i>m/z</i> | Intensity  | ID SIP<br>(Figure S5) | Empirical formula<br>(all- <sup>12</sup> C containing<br>peak)                  | Ion form                   | Mass<br>error<br>(ppm) | KEGG compound          | <i>r</i> -value | <i>p</i> -value |
|------------|------------|-----------------------|---------------------------------------------------------------------------------|----------------------------|------------------------|------------------------|-----------------|-----------------|
| 521.15192  | 38452.1225 | 120                   | C <sub>24</sub> H <sub>31</sub> N <sub>2</sub> O <sub>7</sub> PS                | [M – H] <sup>–</sup>       | 0.45                   |                        | 0.22            | 0.5747          |
| 521.15192  | 38452.1225 | 120                   | C <sub>6</sub> H <sub>26</sub> N <sub>12</sub> O <sub>16</sub>                  | [M – H] <sup>–</sup>       | 0.42                   |                        | –0.72           | 0.4862          |
| 521.15192  | 38452.1225 | 120                   | C <sub>14</sub> H <sub>30</sub> N <sub>6</sub> O <sub>13</sub> S                | [M – H] <sup>–</sup>       | 0.07                   |                        | 0.93            | 0.0003          |
| 521.15192  | 38452.1225 | 120                   | C <sub>17</sub> H <sub>39</sub> N <sub>4</sub> O <sub>4</sub> PS <sub>4</sub>   | [M – H] <sup>–</sup>       | 0.03                   |                        | 0.81            | 0.0082          |
| 521.15192  | 38452.1225 | 120                   | C <sub>18</sub> H <sub>34</sub> N <sub>6</sub> O <sub>4</sub> P <sub>4</sub>    | [M – H] <sup>–</sup>       | –0.02                  |                        | 0.68            | 0.0446          |
| 521.15192  | 38452.1225 | 120                   | C <sub>19</sub> H <sub>28</sub> N <sub>10</sub> O <sub>2</sub> P <sub>2</sub> S | [M – H] <sup>–</sup>       | –0.14                  |                        | 0.56            | 0.1172          |
| 521.15192  | 38452.1225 | 120                   | C <sub>20</sub> H <sub>22</sub> N <sub>14</sub> S <sub>2</sub>                  | [M – H] <sup>–</sup>       | –0.26                  |                        | 0.46            | 0.2126          |
| 521.15192  | 38452.1225 | 120                   | C <sub>22</sub> H <sub>34</sub> O <sub>10</sub> S <sub>2</sub>                  | [M – H] <sup>–</sup>       | –0.28                  |                        | 0.31            | 0.4111          |
| 521.15192  | 38452.1225 | 120                   | C <sub>26</sub> H <sub>38</sub> OP <sub>4</sub> S                               | [M – H] <sup>–</sup>       | –0.37                  |                        | 0.15            | 0.6969          |
| 521.15192  | 38452.1225 | 120                   | C <sub>9</sub> H <sub>27</sub> N <sub>14</sub> O <sub>8</sub> PS                | [M – H] <sup>–</sup>       | –0.52                  |                        | –0.38           | 0.4569          |
| 521.15192  | 38452.1225 | 120                   | C <sub>16</sub> H <sub>37</sub> N <sub>4</sub> O <sub>7</sub> P <sub>3</sub> S  | [M – H] <sup>–</sup>       | –0.75                  |                        | 0.93            | 0.0003          |
| 521.15192  | 38452.1225 | 120                   | C <sub>32</sub> H <sub>27</sub> O <sub>5</sub> P                                | [M – H] <sup>–</sup>       | –0.8                   |                        | 0.05            | 0.9048          |
| 521.15192  | 38452.1225 | 120                   | C <sub>17</sub> H <sub>31</sub> N <sub>8</sub> O <sub>5</sub> PS <sub>2</sub>   | [M – H] <sup>–</sup>       | –0.87                  |                        | 0.81            | 0.0082          |
| 521.15192  | 38452.1225 | 120                   | C <sub>22</sub> H <sub>26</sub> N <sub>4</sub> O <sub>11</sub>                  | [M – H] <sup>–</sup>       | –1.18                  |                        | 0.31            | 0.4111          |
| 521.15192  | 38452.1225 | 120                   | C <sub>25</sub> H <sub>35</sub> N <sub>2</sub> O <sub>2</sub> PS <sub>3</sub>   | [M – H] <sup>–</sup>       | –1.22                  |                        | 0.18            | 0.6405          |
| 521.15192  | 38452.1225 | 120                   | C <sub>11</sub> H <sub>34</sub> N <sub>12</sub> O <sub>2</sub> P <sub>4</sub> S | [M – H] <sup>–</sup>       | –1.33                  |                        | 0.07            | 0.8741          |
| 521.15192  | 38452.1225 | 120                   | C <sub>27</sub> H <sub>24</sub> N <sub>8</sub> P <sub>2</sub>                   | [M – H] <sup>–</sup>       | –1.38                  |                        | 0.13            | 0.7453          |
| 527.33751  | 57657.2125 | 121                   | C <sub>24</sub> H <sub>45</sub> N <sub>4</sub> O <sub>3</sub> P                 | [M + Acetate] <sup>–</sup> | 1.38                   |                        | 0.28            | 0.3837          |
| 527.33751  | 57657.2125 | 121                   | C <sub>22</sub> H <sub>48</sub> N <sub>2</sub> O <sub>6</sub> S                 | [M + Acetate] <sup>–</sup> | 0.66                   |                        | –0.12           | 0.7438          |
| 527.33751  | 57657.2125 | 121                   | C <sub>17</sub> H <sub>45</sub> N <sub>10</sub> OPS                             | [M + Acetate] <sup>–</sup> | 0.08                   |                        | –0.91           | 0.0329          |
| 527.33751  | 57657.2125 | 121                   | C <sub>30</sub> H <sub>44</sub> O <sub>4</sub>                                  | [M + Acetate] <sup>–</sup> | –0.58                  | [3-Oxoglycyrrhetinate] | 0.95            | 0.0000          |
| 527.33751  | 57657.2125 | 121                   | C <sub>27</sub> H <sub>48</sub> N <sub>4</sub> O <sub>4</sub>                   | [M + Cl] <sup>–</sup>      | 1.05                   |                        | 0.67            | 0.0117          |
| 527.33751  | 57657.2125 | 121                   | C <sub>20</sub> H <sub>48</sub> N <sub>10</sub> O <sub>2</sub> S                | [M + Cl] <sup>–</sup>      | –0.25                  |                        | –0.68           | 0.0629          |

Table S1. Cont.

| <i>m/z</i> | Intensity   | ID SIP<br>(Figure S5) | Empirical formula<br>(all- <sup>12</sup> C containing<br>peak)    | Ion form                   | Mass<br>error<br>(ppm) | KEGG compound | <i>r</i> -value | <i>p</i> -value |
|------------|-------------|-----------------------|-------------------------------------------------------------------|----------------------------|------------------------|---------------|-----------------|-----------------|
| 527.33751  | 57657.2125  | 121                   | C <sub>27</sub> H <sub>58</sub> OP <sub>2</sub> S                 | [M + Cl] <sup>−</sup>      | −0.48                  |               | 0.67            | 0.0117          |
| 527.33751  | 57657.2125  | 121                   | C <sub>28</sub> H <sub>44</sub> N <sub>8</sub>                    | [M + Cl] <sup>−</sup>      | −1.49                  |               | 0.78            | 0.0016          |
| 527.33751  | 57657.2125  | 121                   | C <sub>26</sub> H <sub>49</sub> N <sub>4</sub> O <sub>5</sub> P   | [M − H] <sup>−</sup>       | 1.38                   |               | 0.56            | 0.0477          |
| 527.33751  | 57657.2125  | 121                   | C <sub>21</sub> H <sub>46</sub> N <sub>12</sub> P <sub>2</sub>    | [M − H] <sup>−</sup>       | 0.8                    |               | −0.37           | 0.3310          |
| 527.33751  | 57657.2125  | 121                   | C <sub>24</sub> H <sub>52</sub> N <sub>2</sub> O <sub>8</sub> S   | [M − H] <sup>−</sup>       | 0.66                   |               | 0.28            | 0.3837          |
| 527.33751  | 57657.2125  | 121                   | C <sub>19</sub> H <sub>49</sub> N <sub>10</sub> O <sub>3</sub> PS | [M − H] <sup>−</sup>       | 0.08                   |               | −0.91           | 0.0049          |
| 527.33751  | 57657.2125  | 121                   | C <sub>27</sub> H <sub>53</sub> N <sub>4</sub> PS <sub>2</sub>    | [M − H] <sup>−</sup>       | −0.27                  |               | 0.67            | 0.0117          |
| 527.33751  | 57657.2125  | 121                   | C <sub>32</sub> H <sub>48</sub> O <sub>6</sub>                    | [M − H] <sup>−</sup>       | −0.58                  |               | 0.97            | 0.0000          |
| 527.33751  | 57657.2125  | 121                   | C <sub>27</sub> H <sub>45</sub> N <sub>8</sub> OP                 | [M − H] <sup>−</sup>       | −1.15                  |               | 0.67            | 0.0117          |
| 539.43103  | 5999.149833 | 122                   | C <sub>30</sub> H <sub>56</sub> O <sub>4</sub>                    | [M + Acetate] <sup>−</sup> | −1.27                  |               | −0.01           | 0.9727          |
| 539.43103  | 5999.149833 | 122                   | C <sub>27</sub> H <sub>60</sub> N <sub>4</sub> O <sub>4</sub>     | [M + Cl] <sup>−</sup>      | 0.32                   |               | 0.35            | 0.3205          |
| 539.43103  | 5999.149833 | 122                   | C <sub>29</sub> H <sub>52</sub> N <sub>10</sub>                   | [M − H] <sup>−</sup>       | 1.24                   |               | 0.08            | 0.8226          |
| 539.43103  | 5999.149833 | 122                   | C <sub>21</sub> H <sub>58</sub> N <sub>12</sub> P <sub>2</sub>    | [M − H] <sup>−</sup>       | 0.08                   |               | 0.80            | 0.0054          |
| 539.43103  | 5999.149833 | 122                   | C <sub>32</sub> H <sub>60</sub> O <sub>6</sub>                    | [M − H] <sup>−</sup>       | −1.27                  |               | −0.14           | 0.6917          |
| 543.35306  | 15062.22667 | 123                   | C <sub>24</sub> H <sub>40</sub> N <sub>10</sub> O                 | [M + Acetate] <sup>−</sup> | 1.01                   |               | −0.23           | 0.5759          |
| 543.35306  | 15062.22667 | 123                   | C <sub>31</sub> H <sub>50</sub> P <sub>2</sub>                    | [M + Acetate] <sup>−</sup> | 0.79                   |               | −0.53           | 0.1760          |
| 543.35306  | 15062.22667 | 123                   | C <sub>21</sub> H <sub>49</sub> N <sub>4</sub> O <sub>6</sub> P   | [M + Acetate] <sup>−</sup> | 0.43                   |               | 0.17            | 0.6902          |
| 543.35306  | 15062.22667 | 123                   | C <sub>16</sub> H <sub>46</sub> N <sub>12</sub> OP <sub>2</sub>   | [M + Acetate] <sup>−</sup> | −0.13                  |               | 0.85            | 0.0078          |
| 543.35306  | 15062.22667 | 123                   | C <sub>27</sub> H <sub>48</sub> O <sub>7</sub>                    | [M + Acetate] <sup>−</sup> | −1.47                  |               | −0.42           | 0.3034          |
| 543.35306  | 15062.22667 | 123                   | C <sub>34</sub> H <sub>53</sub> OP                                | [M + Cl] <sup>−</sup>      | 0.47                   |               | −0.57           | 0.1365          |
| 543.35306  | 15062.22667 | 123                   | C <sub>24</sub> H <sub>52</sub> N <sub>4</sub> O <sub>7</sub>     | [M + Cl] <sup>−</sup>      | 0.11                   |               | −0.23           | 0.5759          |
| 543.35306  | 15062.22667 | 123                   | C <sub>19</sub> H <sub>49</sub> N <sub>12</sub> O <sub>2</sub> P  | [M + Cl] <sup>−</sup>      | −0.46                  |               | 0.65            | 0.0803          |
| 543.35306  | 15062.22667 | 123                   | C <sub>26</sub> H <sub>59</sub> N <sub>2</sub> OP <sub>3</sub>    | [M + Cl] <sup>−</sup>      | −0.68                  |               | −0.37           | 0.3662          |

Table S1. Cont.

| <i>m/z</i> | Intensity   | ID SIP<br>(Figure S5) | Empirical formula<br>(all- <sup>12</sup> C containing<br>peak)                | Ion form                   | Mass<br>error<br>(ppm) | KEGG compound                       | <i>r</i> -value | <i>p</i> -value |
|------------|-------------|-----------------------|-------------------------------------------------------------------------------|----------------------------|------------------------|-------------------------------------|-----------------|-----------------|
| 543.35306  | 15062.22667 | 123                   | C <sub>25</sub> H <sub>56</sub> N <sub>4</sub> O <sub>2</sub> S <sub>2</sub>  | [M + Cl] <sup>−</sup>      | −1.49                  |                                     | −0.31           | 0.4532          |
| 543.35306  | 15062.22667 | 123                   | C <sub>26</sub> H <sub>44</sub> N <sub>10</sub> O <sub>3</sub>                | [M − H] <sup>−</sup>       | 1.01                   |                                     | −0.37           | 0.3662          |
| 543.35306  | 15062.22667 | 123                   | C <sub>33</sub> H <sub>54</sub> O <sub>2</sub> P <sub>2</sub>                 | [M − H] <sup>−</sup>       | 0.79                   |                                     | −0.56           | 0.1470          |
| 543.35306  | 15062.22667 | 123                   | C <sub>34</sub> H <sub>48</sub> N <sub>4</sub> S                              | [M − H] <sup>−</sup>       | 0.68                   |                                     | −0.57           | 0.1365          |
| 543.35306  | 15062.22667 | 123                   | C <sub>19</sub> H <sub>52</sub> N <sub>12</sub> S <sub>3</sub>                | [M − H] <sup>−</sup>       | 0.61                   |                                     | 0.65            | 0.0803          |
| 543.35306  | 15062.22667 | 123                   | C <sub>23</sub> H <sub>53</sub> N <sub>4</sub> O <sub>8</sub> P               | [M − H] <sup>−</sup>       | 0.43                   |                                     | −0.14           | 0.7497          |
| 543.35306  | 15062.22667 | 123                   | C <sub>18</sub> H <sub>50</sub> N <sub>12</sub> O <sub>3</sub> P <sub>2</sub> | [M − H] <sup>−</sup>       | −0.13                  |                                     | 0.88            | 0.0036          |
| 543.35306  | 15062.22667 | 123                   | C <sub>26</sub> H <sub>54</sub> N <sub>6</sub> P <sub>2</sub> S               | [M − H] <sup>−</sup>       | −0.47                  |                                     | −0.37           | 0.3662          |
| 543.35306  | 15062.22667 | 123                   | C <sub>29</sub> H <sub>52</sub> O <sub>9</sub>                                | [M − H] <sup>−</sup>       | −1.47                  |                                     | −0.49           | 0.2228          |
| 539.35834  | 25747.61833 | 124                   | C <sub>25</sub> H <sub>40</sub> N <sub>10</sub>                               | [M + Acetate] <sup>−</sup> | 1.38                   |                                     | 0.86            | 0.0059          |
| 539.35834  | 25747.61833 | 124                   | C <sub>22</sub> H <sub>49</sub> N <sub>4</sub> O <sub>5</sub> P               | [M + Acetate] <sup>−</sup> | 0.79                   |                                     | 0.81            | 0.0154          |
| 539.35834  | 25747.61833 | 124                   | C <sub>17</sub> H <sub>46</sub> N <sub>12</sub> P <sub>2</sub>                | [M + Acetate] <sup>−</sup> | 0.23                   |                                     | −0.37           | 0.3645          |
| 539.35834  | 25747.61833 | 124                   | C <sub>23</sub> H <sub>53</sub> N <sub>4</sub> PS <sub>2</sub>                | [M + Acetate] <sup>−</sup> | −0.82                  |                                     | 0.89            | 0.0027          |
| 539.35834  | 25747.61833 | 124                   | C <sub>28</sub> H <sub>48</sub> O <sub>6</sub>                                | [M + Acetate] <sup>−</sup> | −1.12                  | [24-epi-Brassinolide, Brassinolide] | 0.61            | 0.1079          |
| 539.35834  | 25747.61833 | 124                   | C <sub>25</sub> H <sub>52</sub> N <sub>4</sub> O <sub>6</sub>                 | [M + Cl] <sup>−</sup>      | 0.47                   |                                     | 0.86            | 0.0059          |
| 539.35834  | 25747.61833 | 124                   | C <sub>20</sub> H <sub>49</sub> N <sub>12</sub> OP                            | [M + Cl] <sup>−</sup>      | −0.1                   |                                     | 0.42            | 0.3020          |
| 539.35834  | 25747.61833 | 124                   | C <sub>27</sub> H <sub>59</sub> N <sub>2</sub> P <sub>3</sub>                 | [M + Cl] <sup>−</sup>      | −0.32                  |                                     | 0.70            | 0.0545          |
| 539.35834  | 25747.61833 | 124                   | C <sub>26</sub> H <sub>56</sub> N <sub>4</sub> OS <sub>2</sub>                | [M + Cl] <sup>−</sup>      | −1.14                  |                                     | 0.79            | 0.0209          |
| 539.35834  | 25747.61833 | 124                   | C <sub>27</sub> H <sub>44</sub> N <sub>10</sub> O <sub>2</sub>                | [M − H] <sup>−</sup>       | 1.38                   |                                     | 0.70            | 0.0545          |
| 539.35834  | 25747.61833 | 124                   | C <sub>34</sub> H <sub>54</sub> OP <sub>2</sub>                               | [M − H] <sup>−</sup>       | 1.16                   |                                     | 0.27            | 0.5257          |
| 539.35834  | 25747.61833 | 124                   | C <sub>24</sub> H <sub>53</sub> N <sub>4</sub> O <sub>7</sub> P               | [M − H] <sup>−</sup>       | 0.79                   |                                     | 0.91            | 0.0019          |
| 539.35834  | 25747.61833 | 124                   | C <sub>19</sub> H <sub>50</sub> N <sub>12</sub> O <sub>2</sub> P <sub>2</sub> | [M − H] <sup>−</sup>       | 0.23                   |                                     | 0.16            | 0.7121          |
| 539.35834  | 25747.61833 | 124                   | C <sub>26</sub> H <sub>60</sub> N <sub>2</sub> OP <sub>4</sub>                | [M − H] <sup>−</sup>       | 0                      |                                     | 0.79            | 0.0209          |

Table S1. Cont.

| <i>m/z</i> | Intensity   | ID SIP<br>(Figure S5) | Empirical formula<br>(all- <sup>12</sup> C containing<br>peak)                | Ion form                   | Mass<br>error<br>(ppm) | KEGG compound | <i>r</i> -value | <i>p</i> -value |
|------------|-------------|-----------------------|-------------------------------------------------------------------------------|----------------------------|------------------------|---------------|-----------------|-----------------|
| 539.35834  | 25747.61833 | 124                   | C <sub>25</sub> H <sub>57</sub> N <sub>4</sub> O <sub>2</sub> PS <sub>2</sub> | [M – H] <sup>–</sup>       | –0.82                  |               | 0.86            | 0.0059          |
| 539.35834  | 25747.61833 | 124                   | C <sub>30</sub> H <sub>52</sub> O <sub>8</sub>                                | [M – H] <sup>–</sup>       | –1.12                  |               | 0.46            | 0.2500          |
| 553.37380  | 35429.475   | 125                   | C <sub>26</sub> H <sub>42</sub> N <sub>10</sub>                               | [M + Acetate] <sup>–</sup> | 1.01                   |               | –0.63           | 0.0120          |
| 553.37380  | 35429.475   | 125                   | C <sub>23</sub> H <sub>51</sub> N <sub>4</sub> O <sub>5</sub> P               | [M + Acetate] <sup>–</sup> | 0.43                   |               | –0.24           | 0.3960          |
| 553.37380  | 35429.475   | 125                   | C <sub>18</sub> H <sub>48</sub> N <sub>12</sub> P <sub>2</sub>                | [M + Acetate] <sup>–</sup> | –0.12                  |               | 0.79            | 0.0004          |
| 553.37380  | 35429.475   | 125                   | C <sub>24</sub> H <sub>55</sub> N <sub>4</sub> PS <sub>2</sub>                | [M + Acetate] <sup>–</sup> | –1.14                  |               | –0.41           | 0.1285          |
| 553.37380  | 35429.475   | 125                   | C <sub>29</sub> H <sub>50</sub> O <sub>6</sub>                                | [M + Acetate] <sup>–</sup> | –1.43                  |               | –0.71           | 0.0030          |
| 553.37380  | 35429.475   | 125                   | C <sub>26</sub> H <sub>54</sub> N <sub>4</sub> O <sub>6</sub>                 | [M + Cl] <sup>–</sup>      | 0.11                   |               | –0.63           | 0.0120          |
| 553.37380  | 35429.475   | 125                   | C <sub>21</sub> H <sub>51</sub> N <sub>12</sub> OP                            | [M + Cl] <sup>–</sup>      | –0.44                  |               | 0.19            | 0.4862          |
| 553.37380  | 35429.475   | 125                   | C <sub>28</sub> H <sub>61</sub> N <sub>2</sub> P <sub>3</sub>                 | [M + Cl] <sup>–</sup>      | –0.66                  |               | –0.70           | 0.0034          |
| 553.37380  | 35429.475   | 125                   | C <sub>27</sub> H <sub>58</sub> N <sub>4</sub> OS <sub>2</sub>                | [M + Cl] <sup>–</sup>      | –1.46                  |               | –0.68           | 0.0053          |
| 553.37380  | 35429.475   | 125                   | C <sub>28</sub> H <sub>46</sub> N <sub>10</sub> O <sub>2</sub>                | [M – H] <sup>–</sup>       | 1.01                   |               | –0.70           | 0.0034          |
| 553.37380  | 35429.475   | 125                   | C <sub>25</sub> H <sub>55</sub> N <sub>4</sub> O <sub>7</sub> P               | [M – H] <sup>–</sup>       | 0.43                   |               | –0.54           | 0.0371          |
| 553.37380  | 35429.475   | 125                   | C <sub>20</sub> H <sub>52</sub> N <sub>12</sub> O <sub>2</sub> P <sub>2</sub> | [M – H] <sup>–</sup>       | –0.12                  |               | 0.42            | 0.1212          |
| 553.37380  | 35429.475   | 125                   | C <sub>27</sub> H <sub>62</sub> N <sub>2</sub> OP <sub>4</sub>                | [M – H] <sup>–</sup>       | –0.34                  |               | –0.68           | 0.0053          |
| 553.37380  | 35429.475   | 125                   | C <sub>26</sub> H <sub>59</sub> N <sub>4</sub> O <sub>2</sub> PS <sub>2</sub> | [M – H] <sup>–</sup>       | –1.14                  |               | –0.63           | 0.0120          |
| 553.37380  | 35429.475   | 125                   | C <sub>31</sub> H <sub>54</sub> O <sub>8</sub>                                | [M – H] <sup>–</sup>       | –1.43                  |               | –0.69           | 0.0041          |
| 563.35818  | 263391.525  | 126                   | C <sub>27</sub> H <sub>40</sub> N <sub>10</sub>                               | [M + Acetate] <sup>–</sup> | 1.04                   |               | 0.33            | 0.3842          |
| 563.35818  | 263391.525  | 126                   | C <sub>24</sub> H <sub>49</sub> N <sub>4</sub> O <sub>5</sub> P               | [M + Acetate] <sup>–</sup> | 0.47                   |               | 0.01            | 0.9848          |
| 563.35818  | 263391.525  | 126                   | C <sub>19</sub> H <sub>46</sub> N <sub>12</sub> P <sub>2</sub>                | [M + Acetate] <sup>–</sup> | –0.07                  |               | –0.90           | 0.0972          |
| 563.35818  | 263391.525  | 126                   | C <sub>25</sub> H <sub>53</sub> N <sub>4</sub> PS <sub>2</sub>                | [M + Acetate] <sup>–</sup> | –1.07                  |               | 0.10            | 0.7989          |
| 563.35818  | 263391.525  | 126                   | C <sub>30</sub> H <sub>48</sub> O <sub>6</sub>                                | [M + Acetate] <sup>–</sup> | –1.36                  |               | 0.76            | 0.0169          |
| 563.35818  | 263391.525  | 126                   | C <sub>27</sub> H <sub>52</sub> N <sub>4</sub> O <sub>6</sub>                 | [M + Cl] <sup>–</sup>      | 0.16                   |               | 0.33            | 0.3842          |

Table S1. Cont.

| <i>m/z</i> | Intensity  | ID SIP<br>(Figure S5) | Empirical formula<br>(all- <sup>12</sup> C containing<br>peak)                | Ion form            | Mass<br>error<br>(ppm) | KEGG compound | <i>r</i> -value | <i>p</i> -value |
|------------|------------|-----------------------|-------------------------------------------------------------------------------|---------------------|------------------------|---------------|-----------------|-----------------|
| 563.35818  | 263391.525 | 126                   | C <sub>22</sub> H <sub>49</sub> N <sub>12</sub> OP                            | [M+Cl] <sup>-</sup> | -0.38                  |               | -0.68           | 0.0899          |
| 563.35818  | 263391.525 | 126                   | C <sub>29</sub> H <sub>59</sub> N <sub>2</sub> P <sub>3</sub>                 | [M+Cl] <sup>-</sup> | -0.59                  |               | 0.61            | 0.0786          |
| 563.35818  | 263391.525 | 126                   | C <sub>20</sub> H <sub>52</sub> N <sub>10</sub> O <sub>4</sub> S              | [M+Cl] <sup>-</sup> | -1.05                  |               | -0.92           | 0.0288          |
| 563.35818  | 263391.525 | 126                   | C <sub>28</sub> H <sub>56</sub> N <sub>4</sub> OS <sub>2</sub>                | [M+Cl] <sup>-</sup> | -1.38                  |               | 0.47            | 0.2042          |
| 563.35818  | 263391.525 | 126                   | C <sub>29</sub> H <sub>44</sub> N <sub>10</sub> O <sub>2</sub>                | [M-H] <sup>-</sup>  | 1.04                   |               | 0.61            | 0.0786          |
| 563.35818  | 263391.525 | 126                   | C <sub>26</sub> H <sub>53</sub> N <sub>4</sub> O <sub>7</sub> P               | [M-H] <sup>-</sup>  | 0.47                   |               | 0.21            | 0.5919          |
| 563.35818  | 263391.525 | 126                   | C <sub>21</sub> H <sub>50</sub> N <sub>12</sub> O <sub>2</sub> P <sub>2</sub> | [M-H] <sup>-</sup>  | -0.07                  |               | -0.91           | 0.0119          |
| 563.35818  | 263391.525 | 126                   | C <sub>28</sub> H <sub>60</sub> N <sub>2</sub> OP <sub>4</sub>                | [M-H] <sup>-</sup>  | -0.28                  |               | 0.47            | 0.2042          |
| 563.35818  | 263391.525 | 126                   | C <sub>27</sub> H <sub>57</sub> N <sub>4</sub> O <sub>2</sub> PS <sub>2</sub> | [M-H] <sup>-</sup>  | -1.07                  |               | 0.33            | 0.3842          |
| 563.35818  | 263391.525 | 126                   | C <sub>32</sub> H <sub>52</sub> O <sub>8</sub>                                | [M-H] <sup>-</sup>  | -1.36                  |               | 0.98            | 0.0000          |

**Figure S5.** Stable isotope patterns located in mass spectra collected from  $^{13}\text{C}$ -labeled cultures of *Alexandrium tamarensis*.

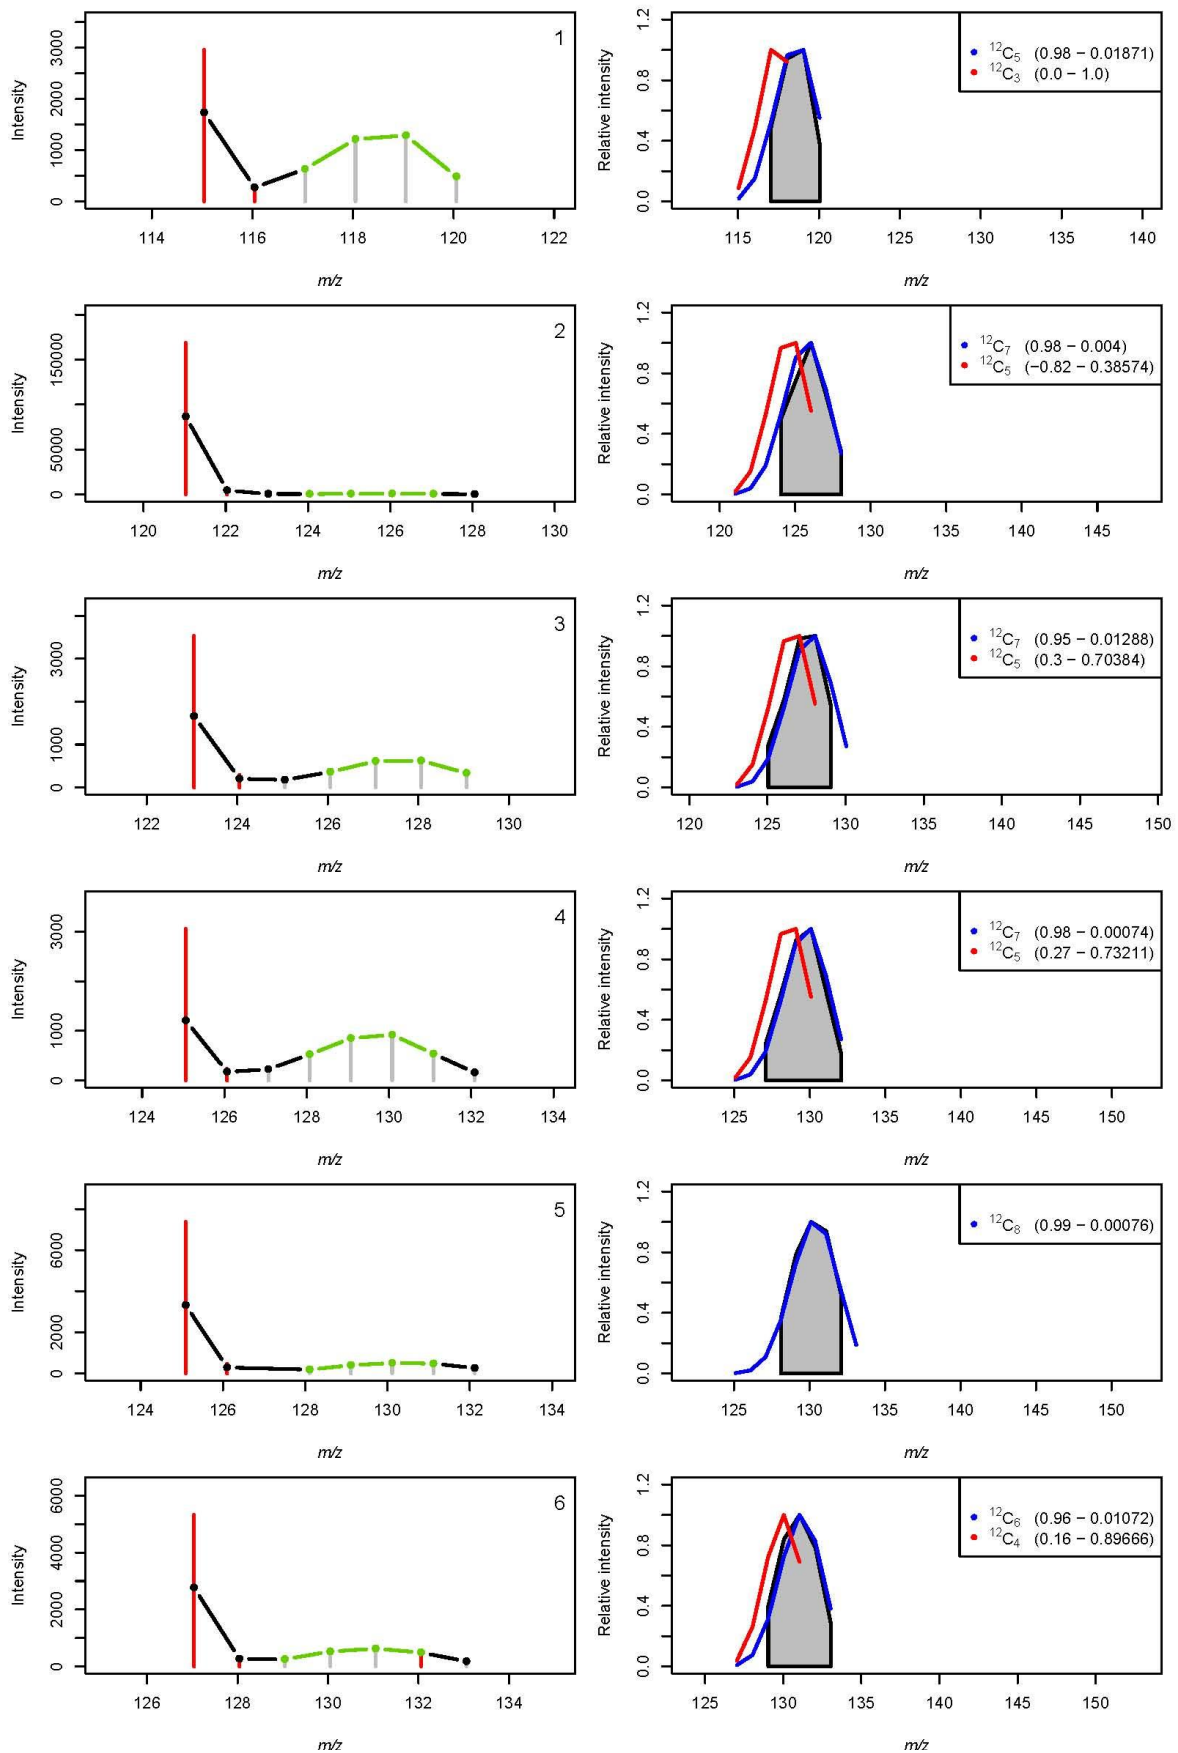

Figure S5. Cont.

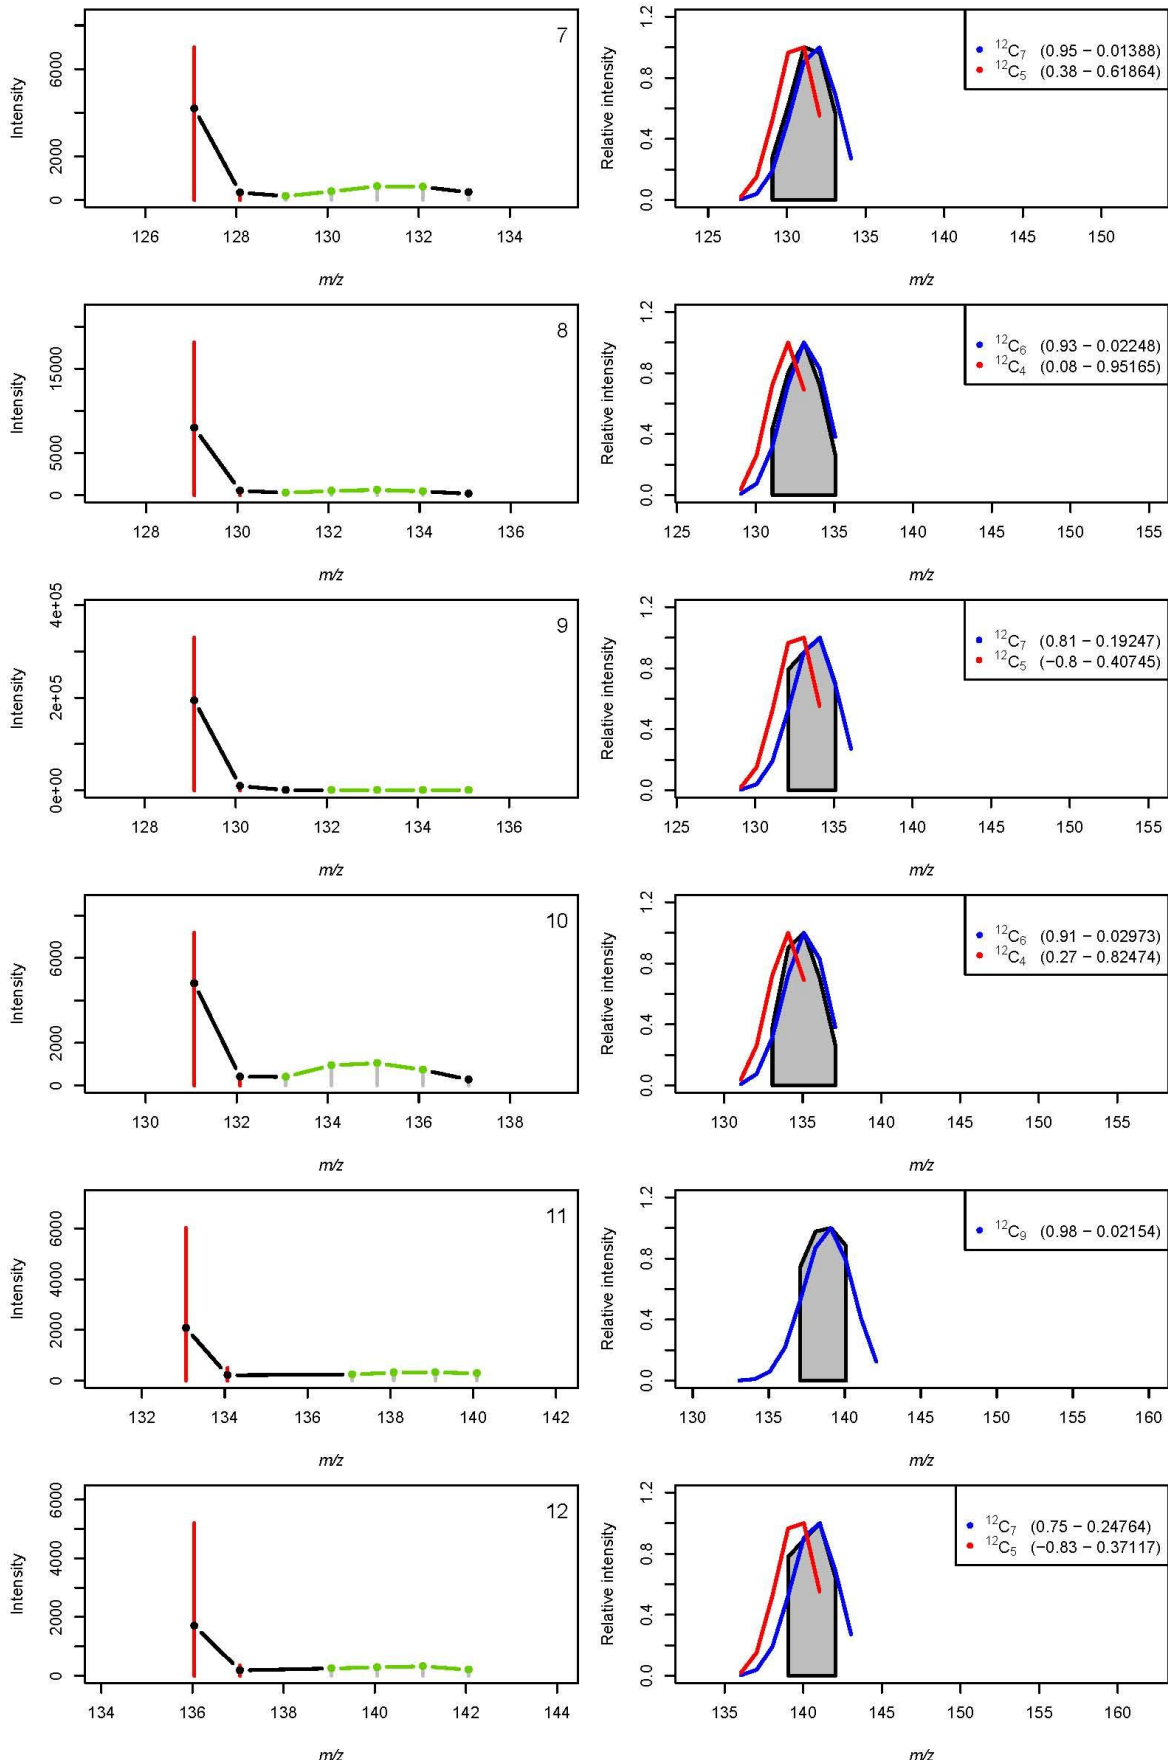

Figure S5. Cont.

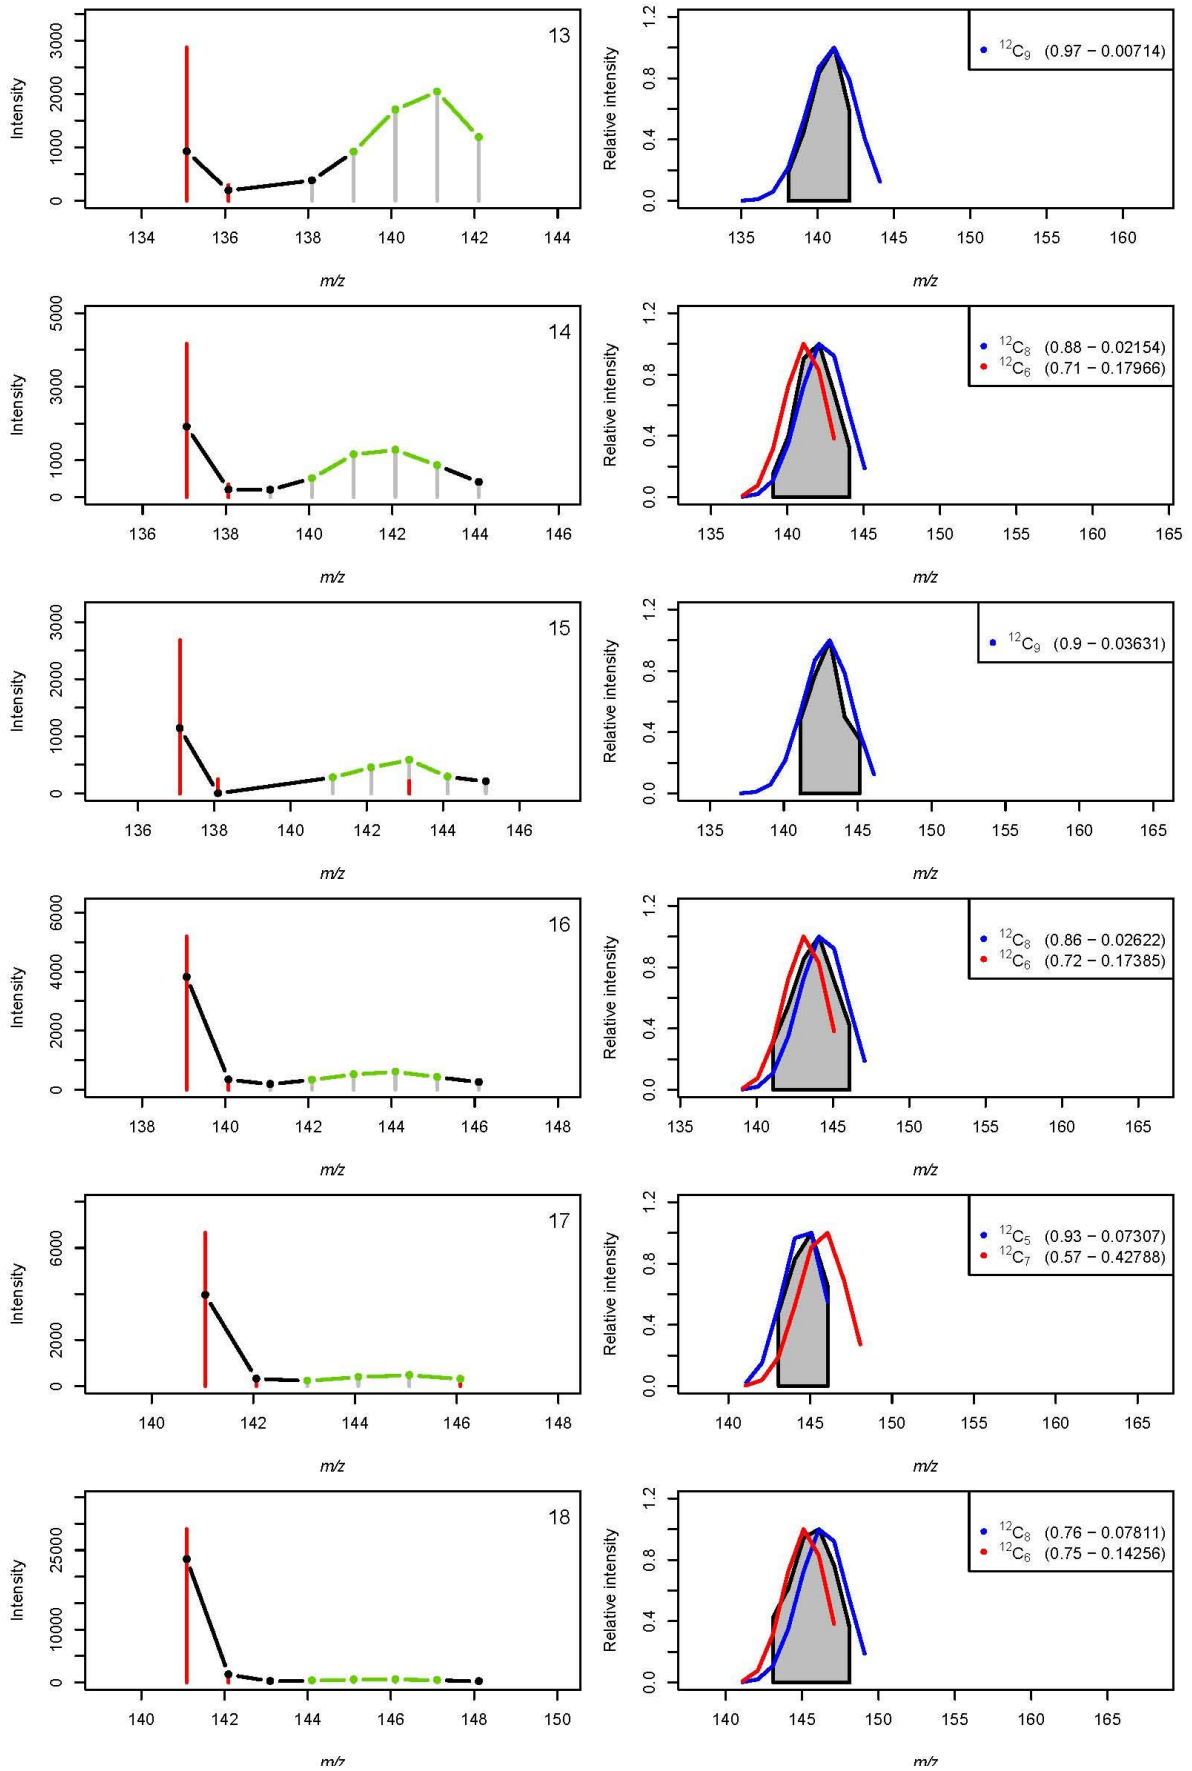



Figure S5. Cont.

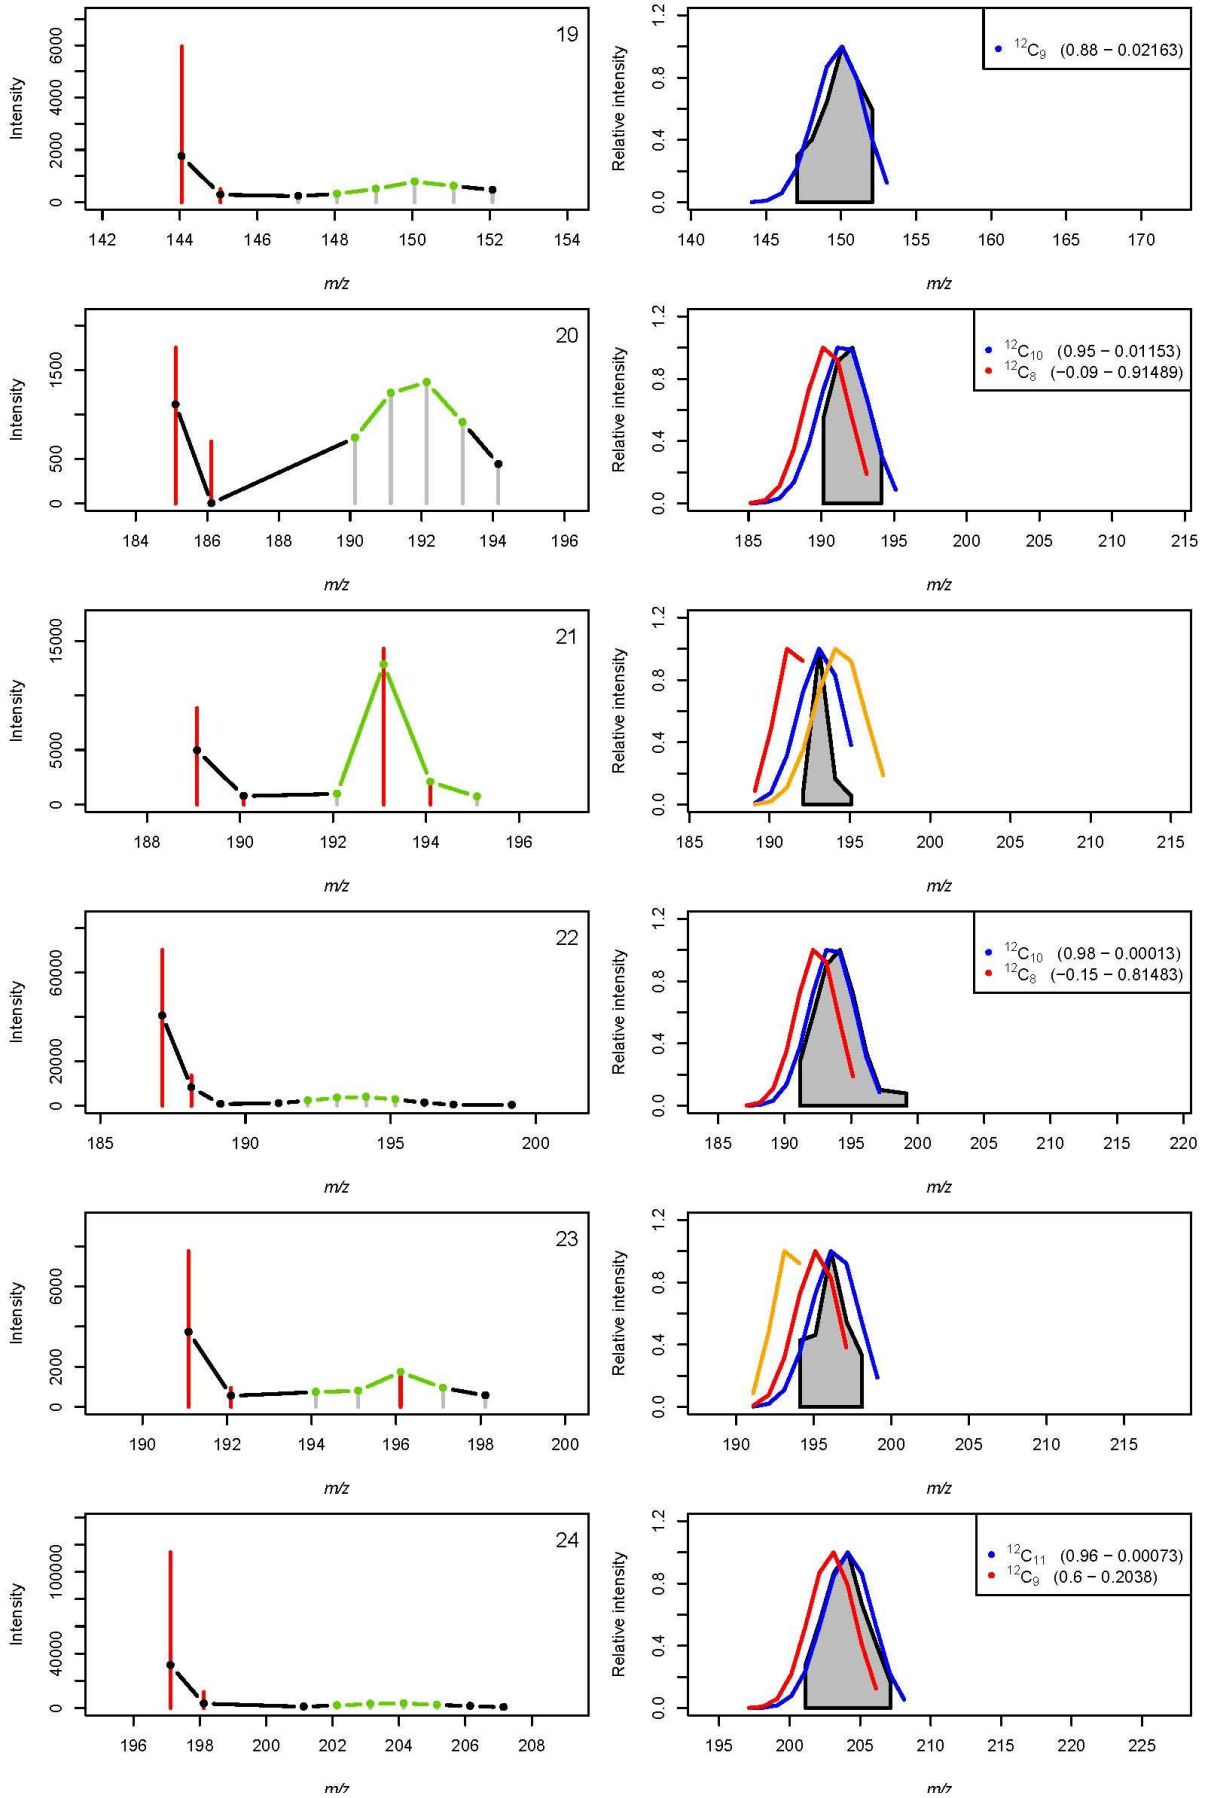

Figure S5. Cont.

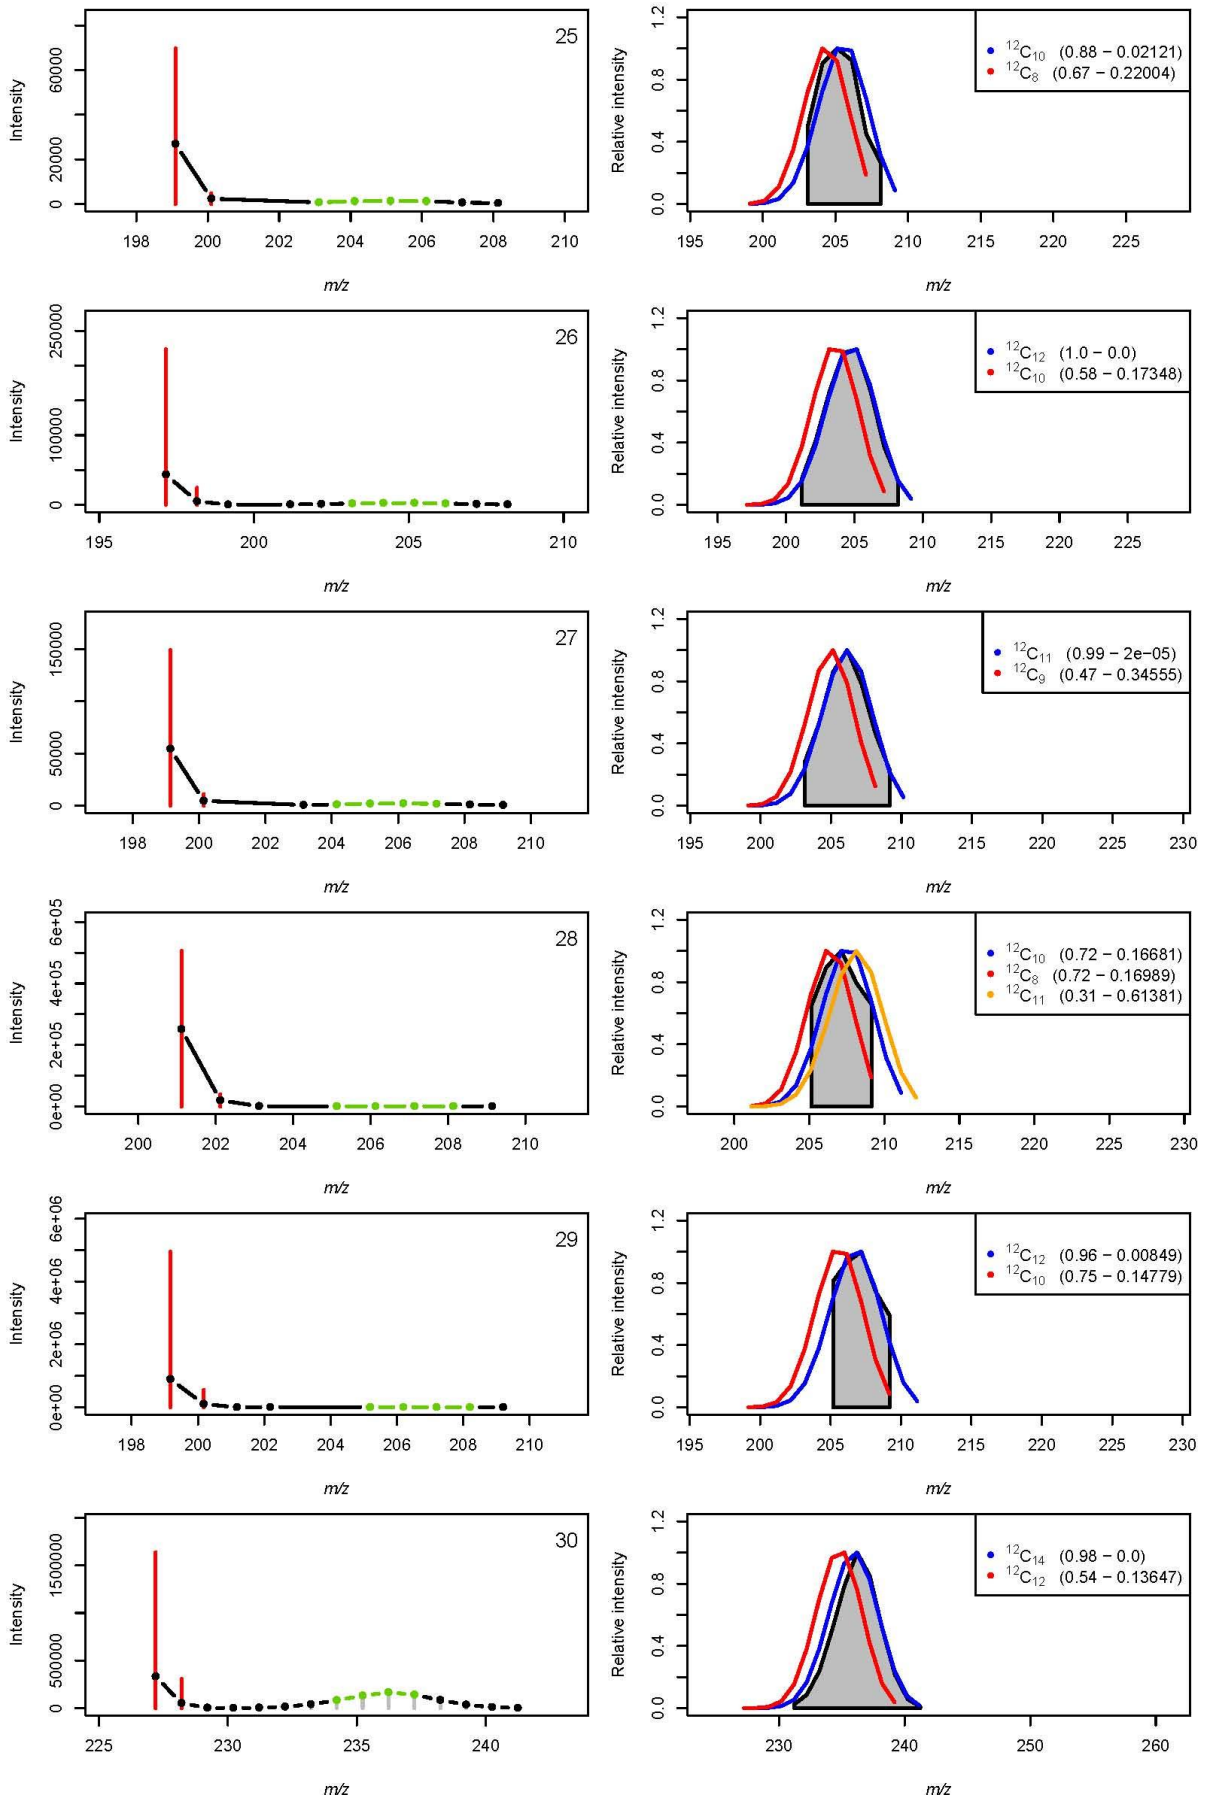

Figure S5. Cont.

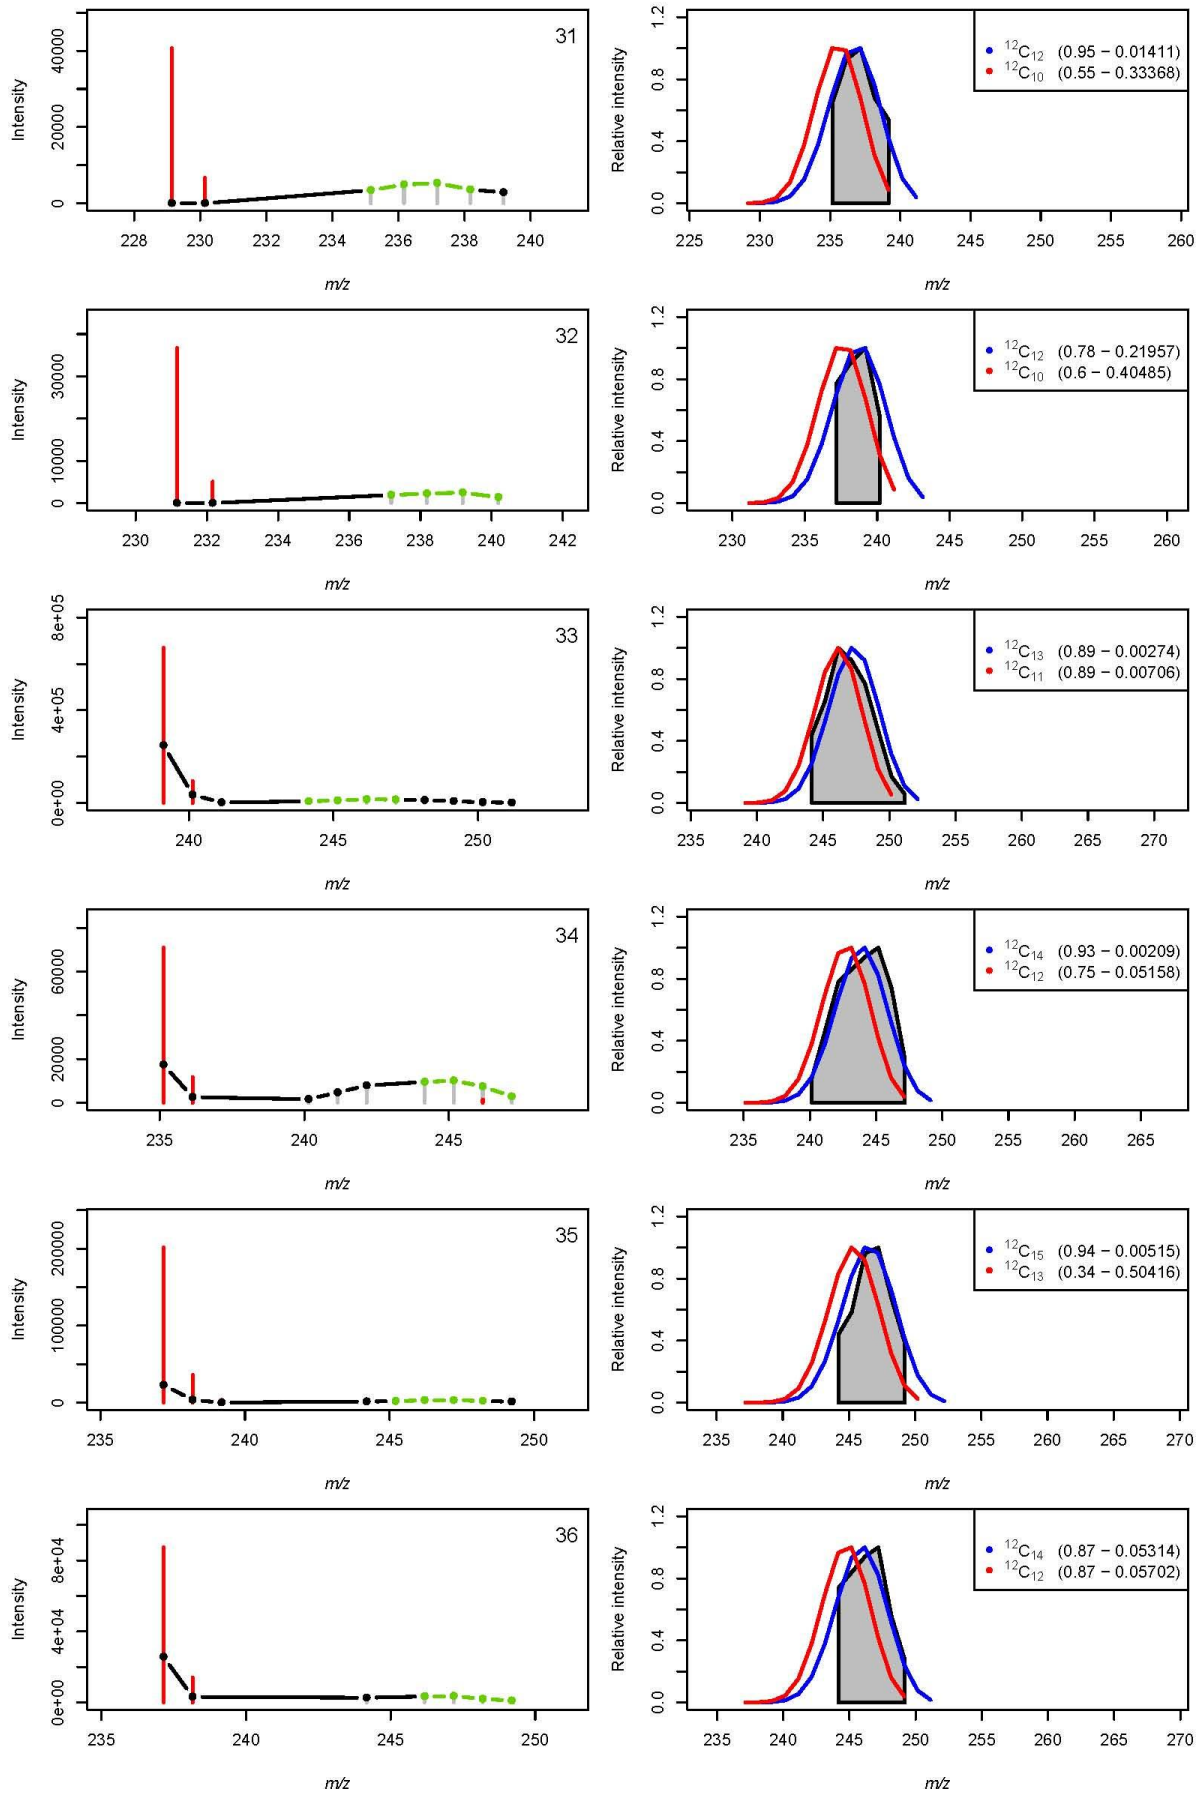

Figure S5. Cont.

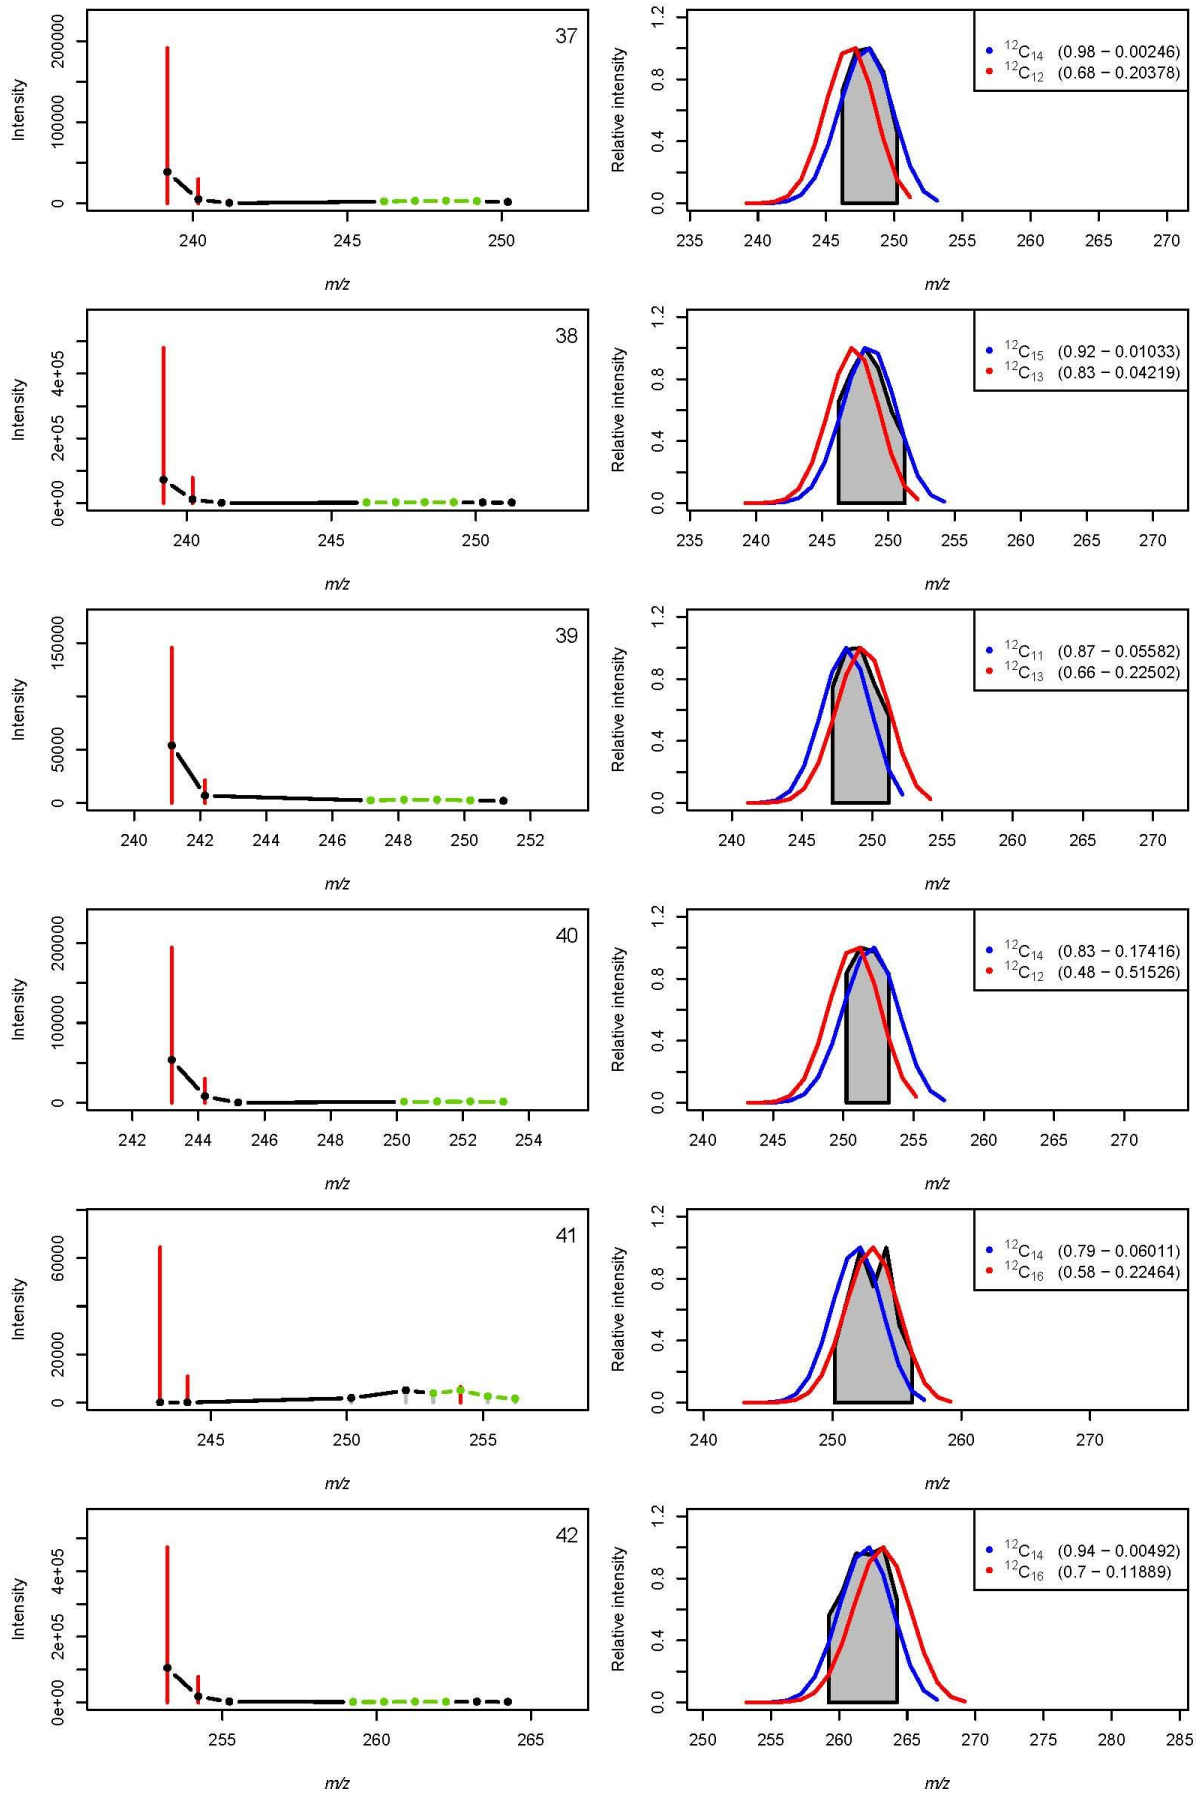

Figure S5. Cont.

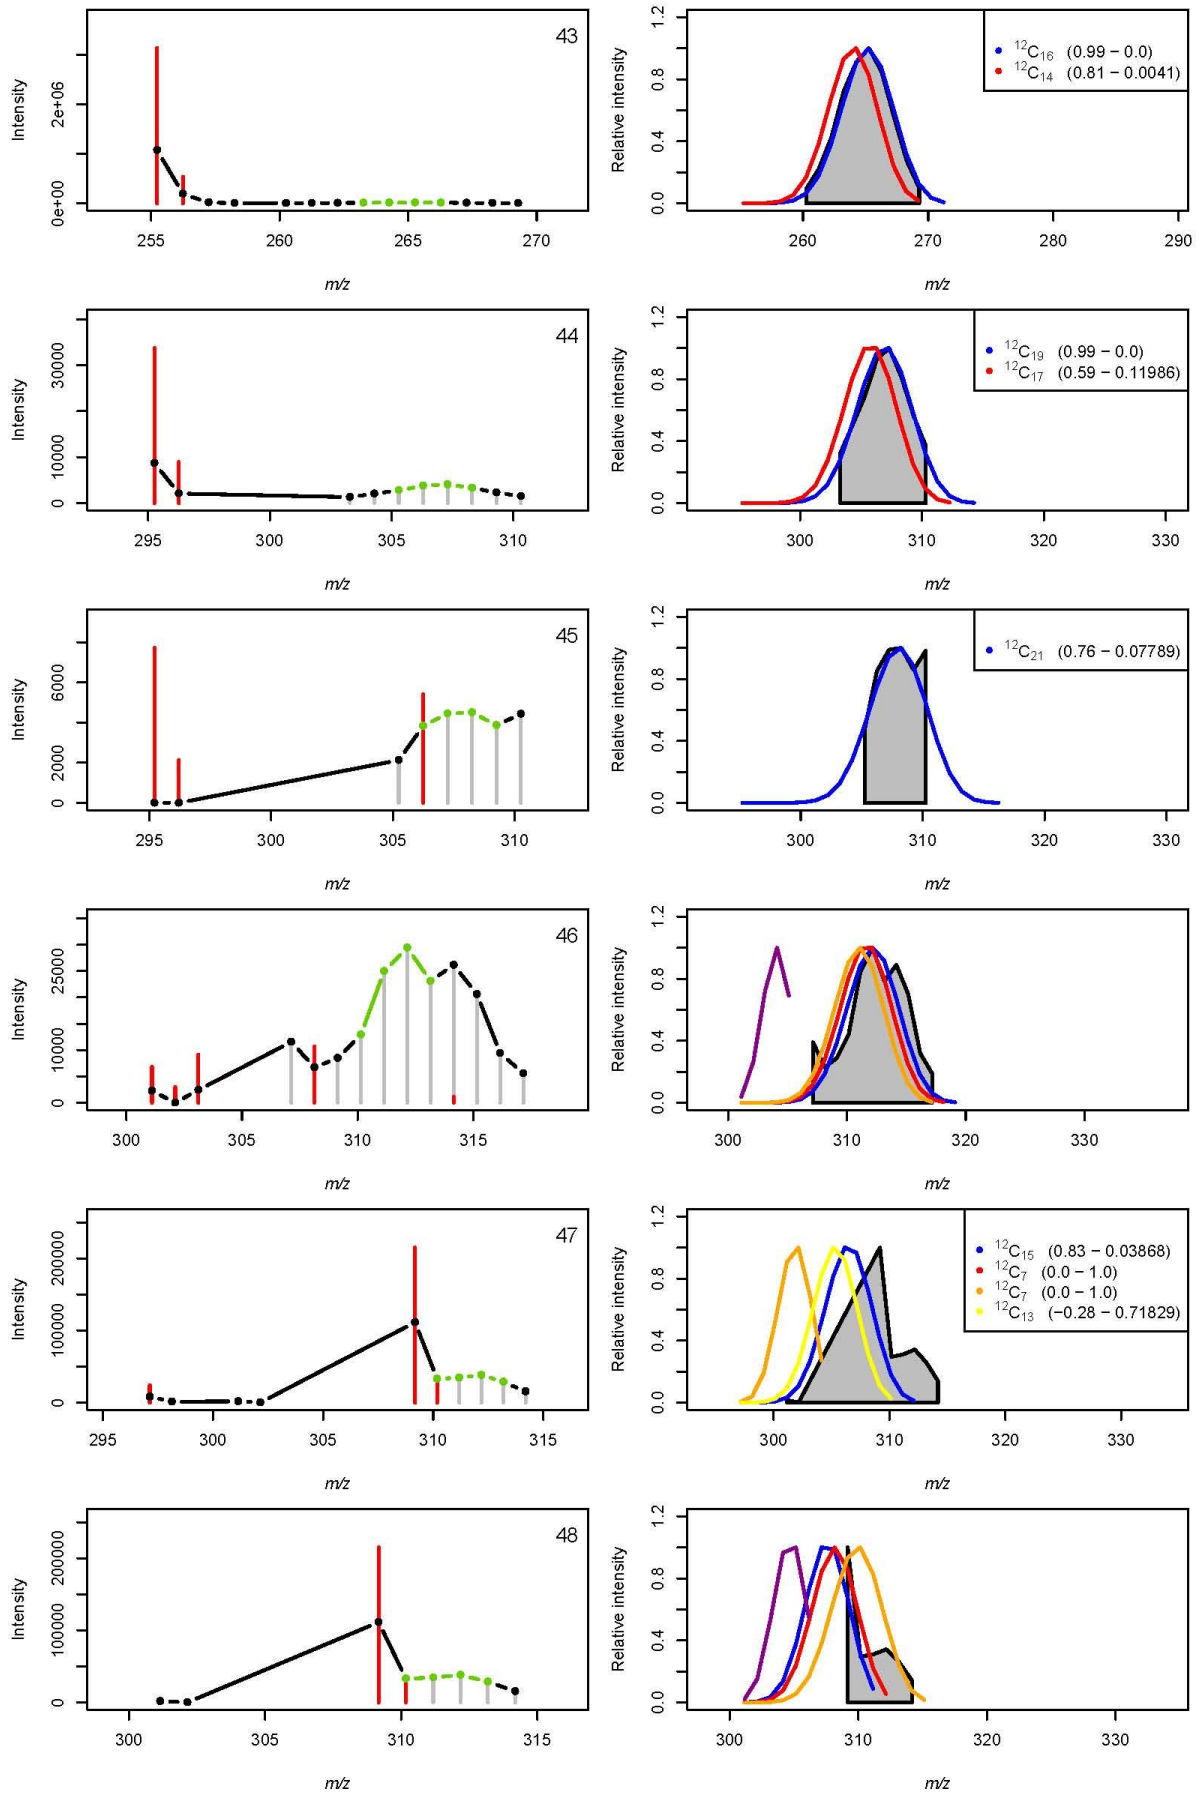

Figure S5. Cont.

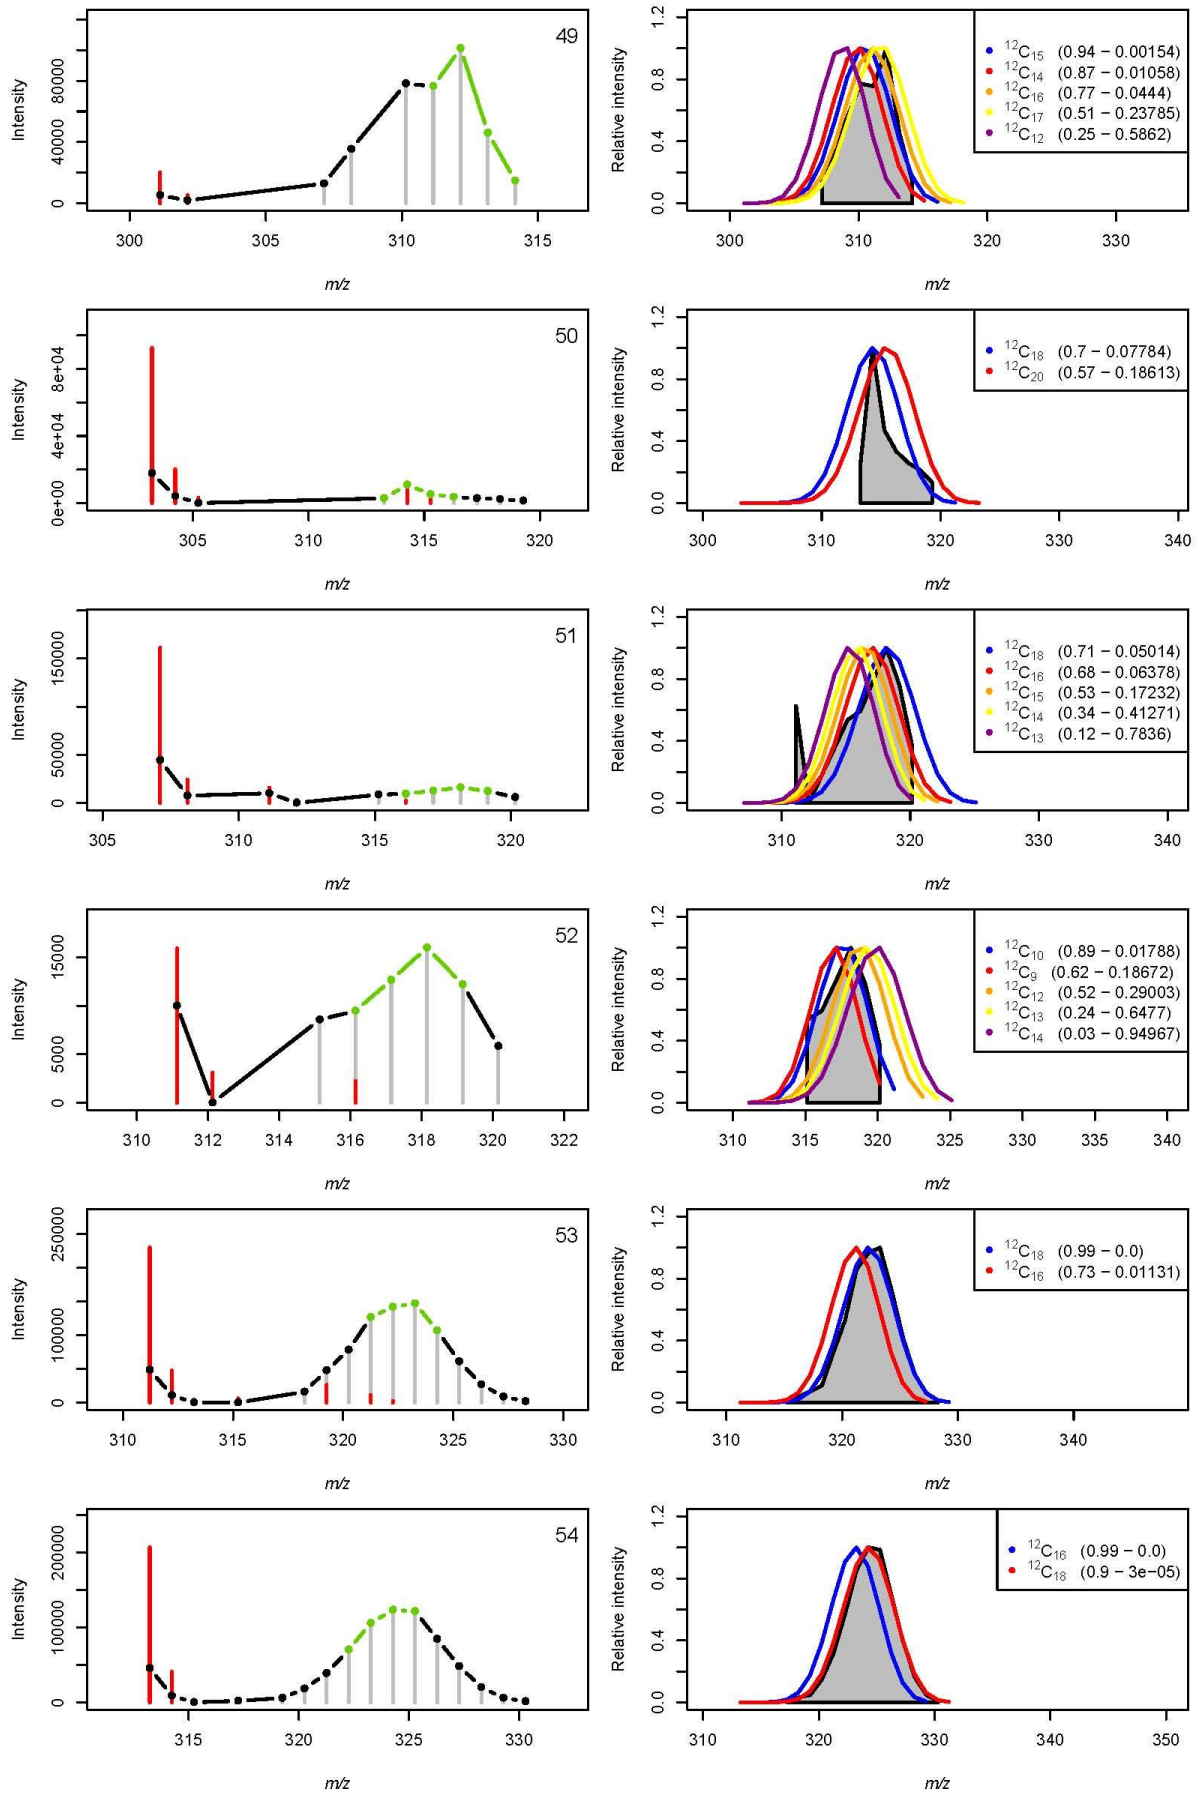



Figure S5. Cont.

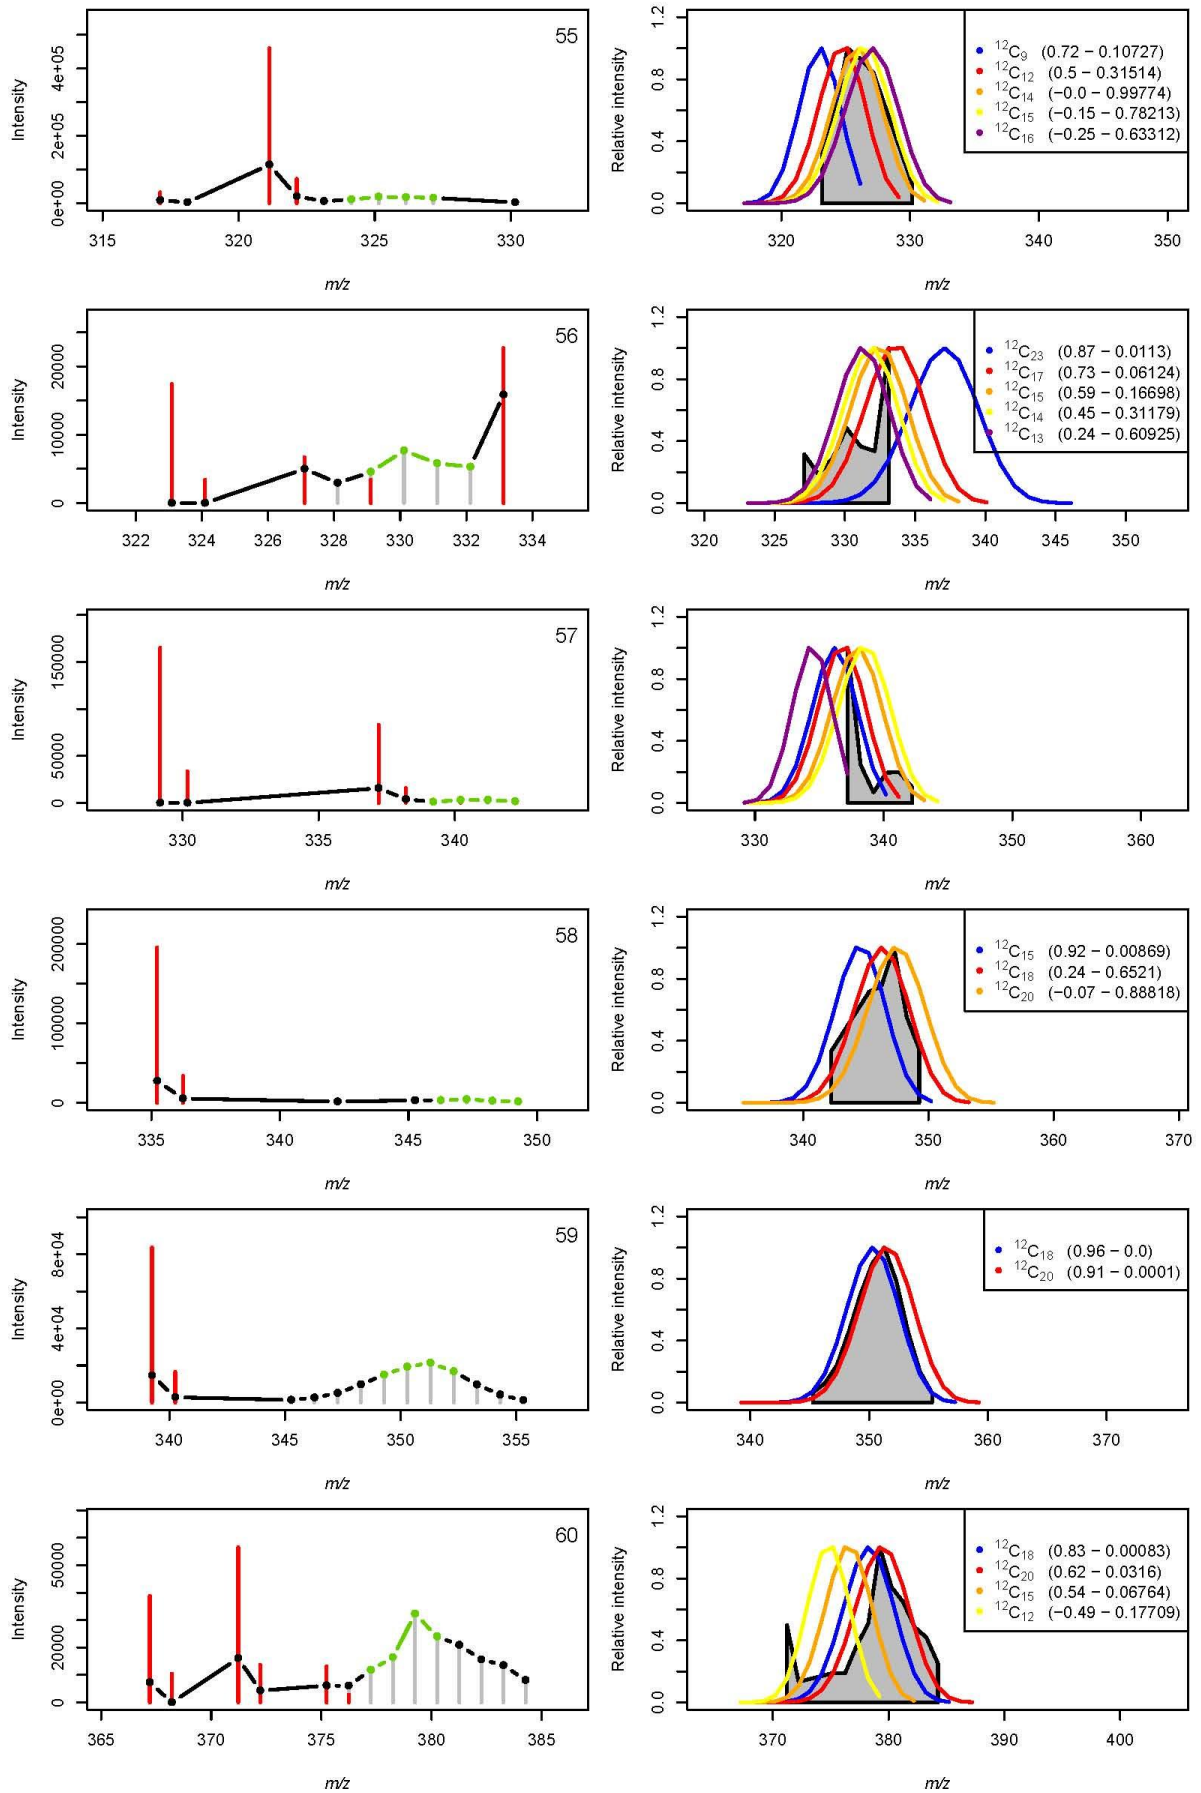

Figure S5. Cont.

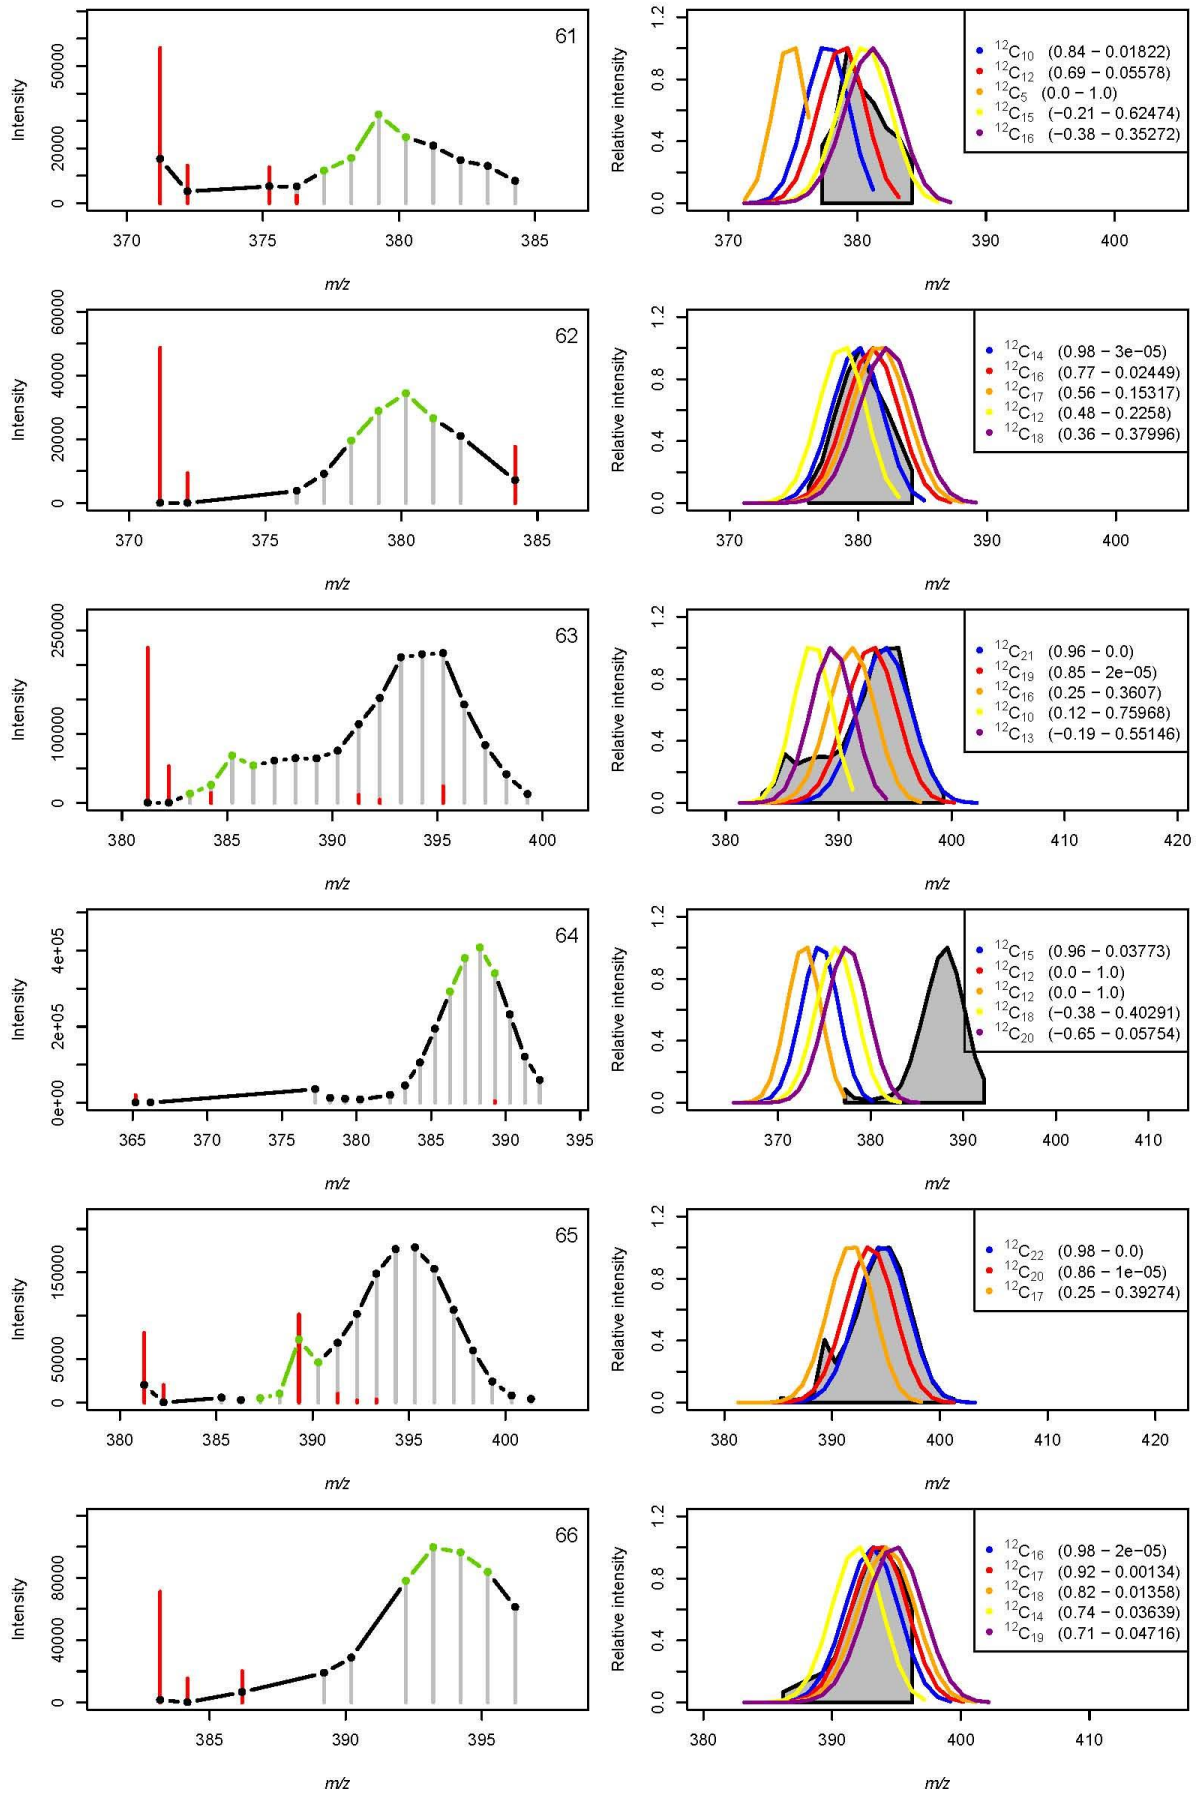



Figure S5. Cont.

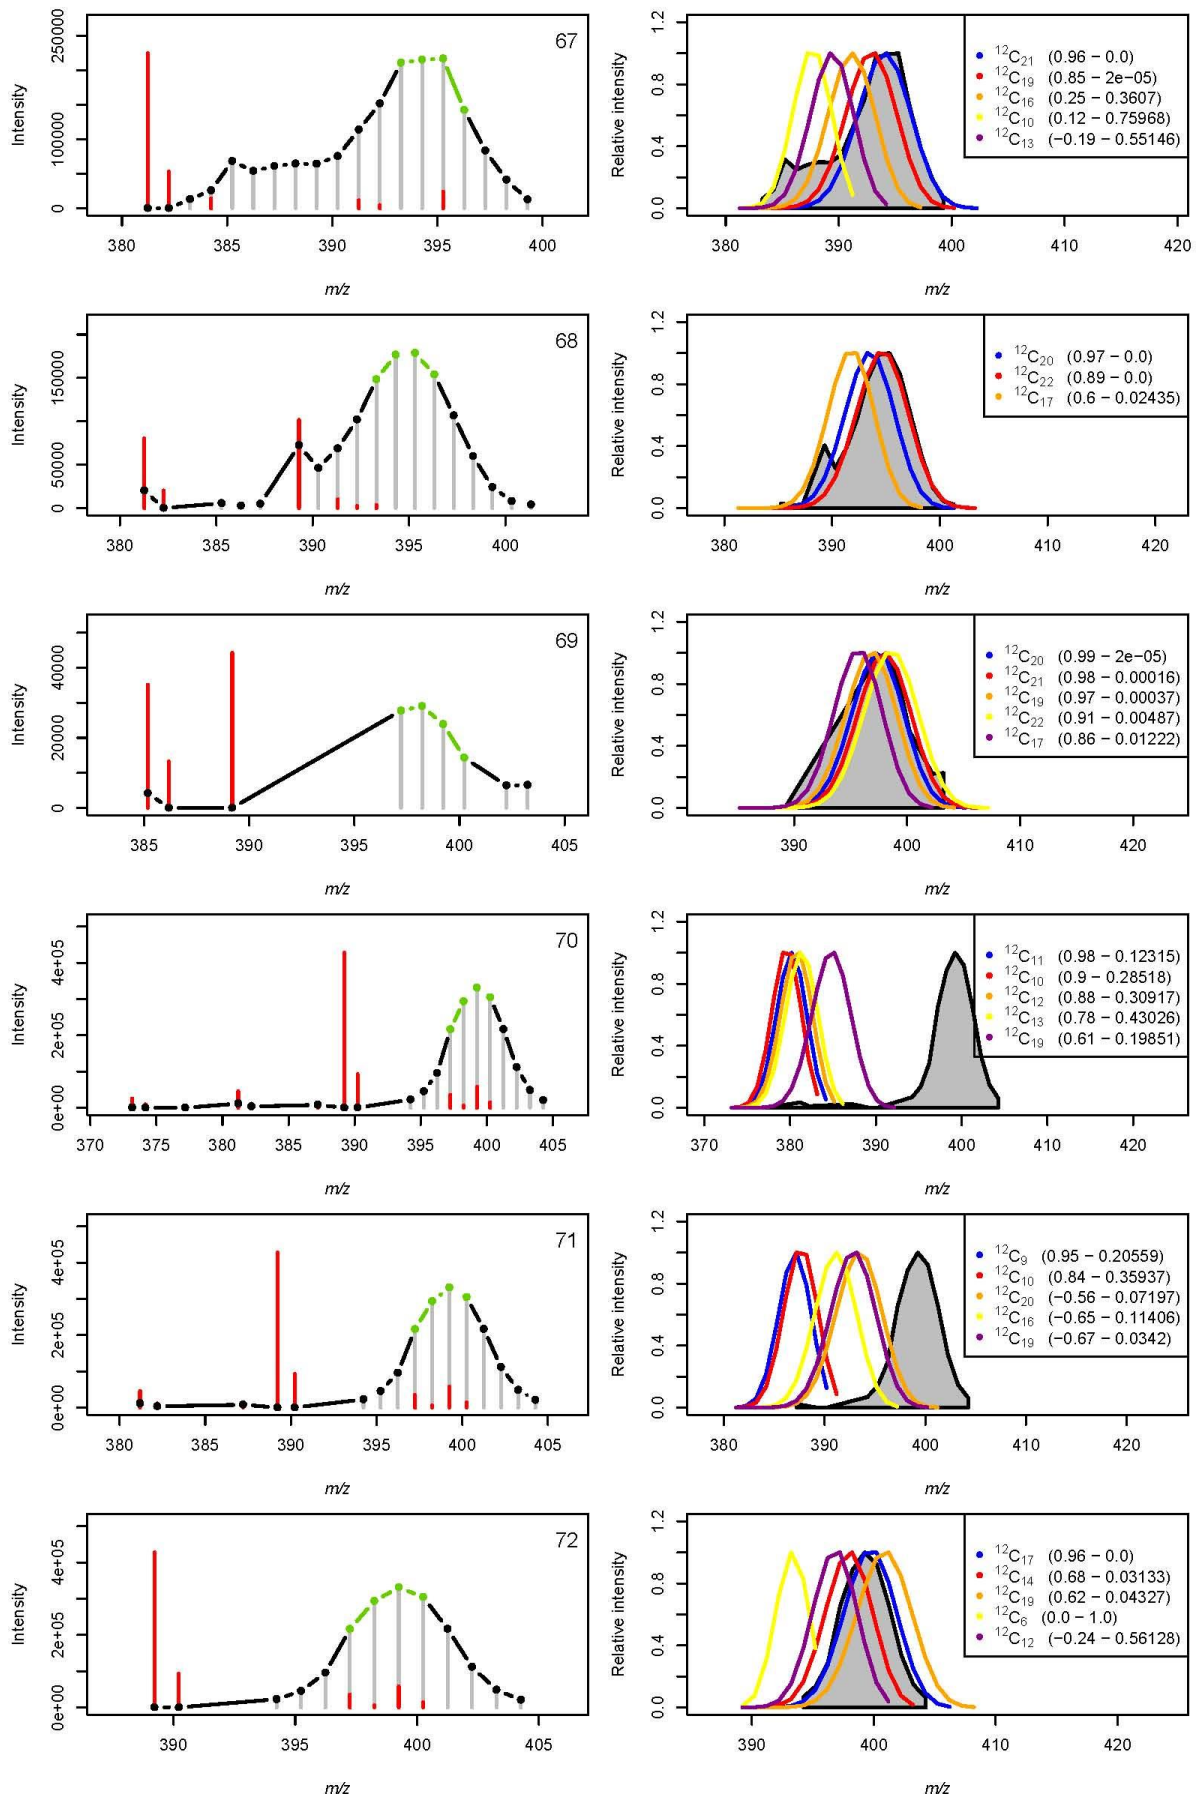

Figure S5. Cont.

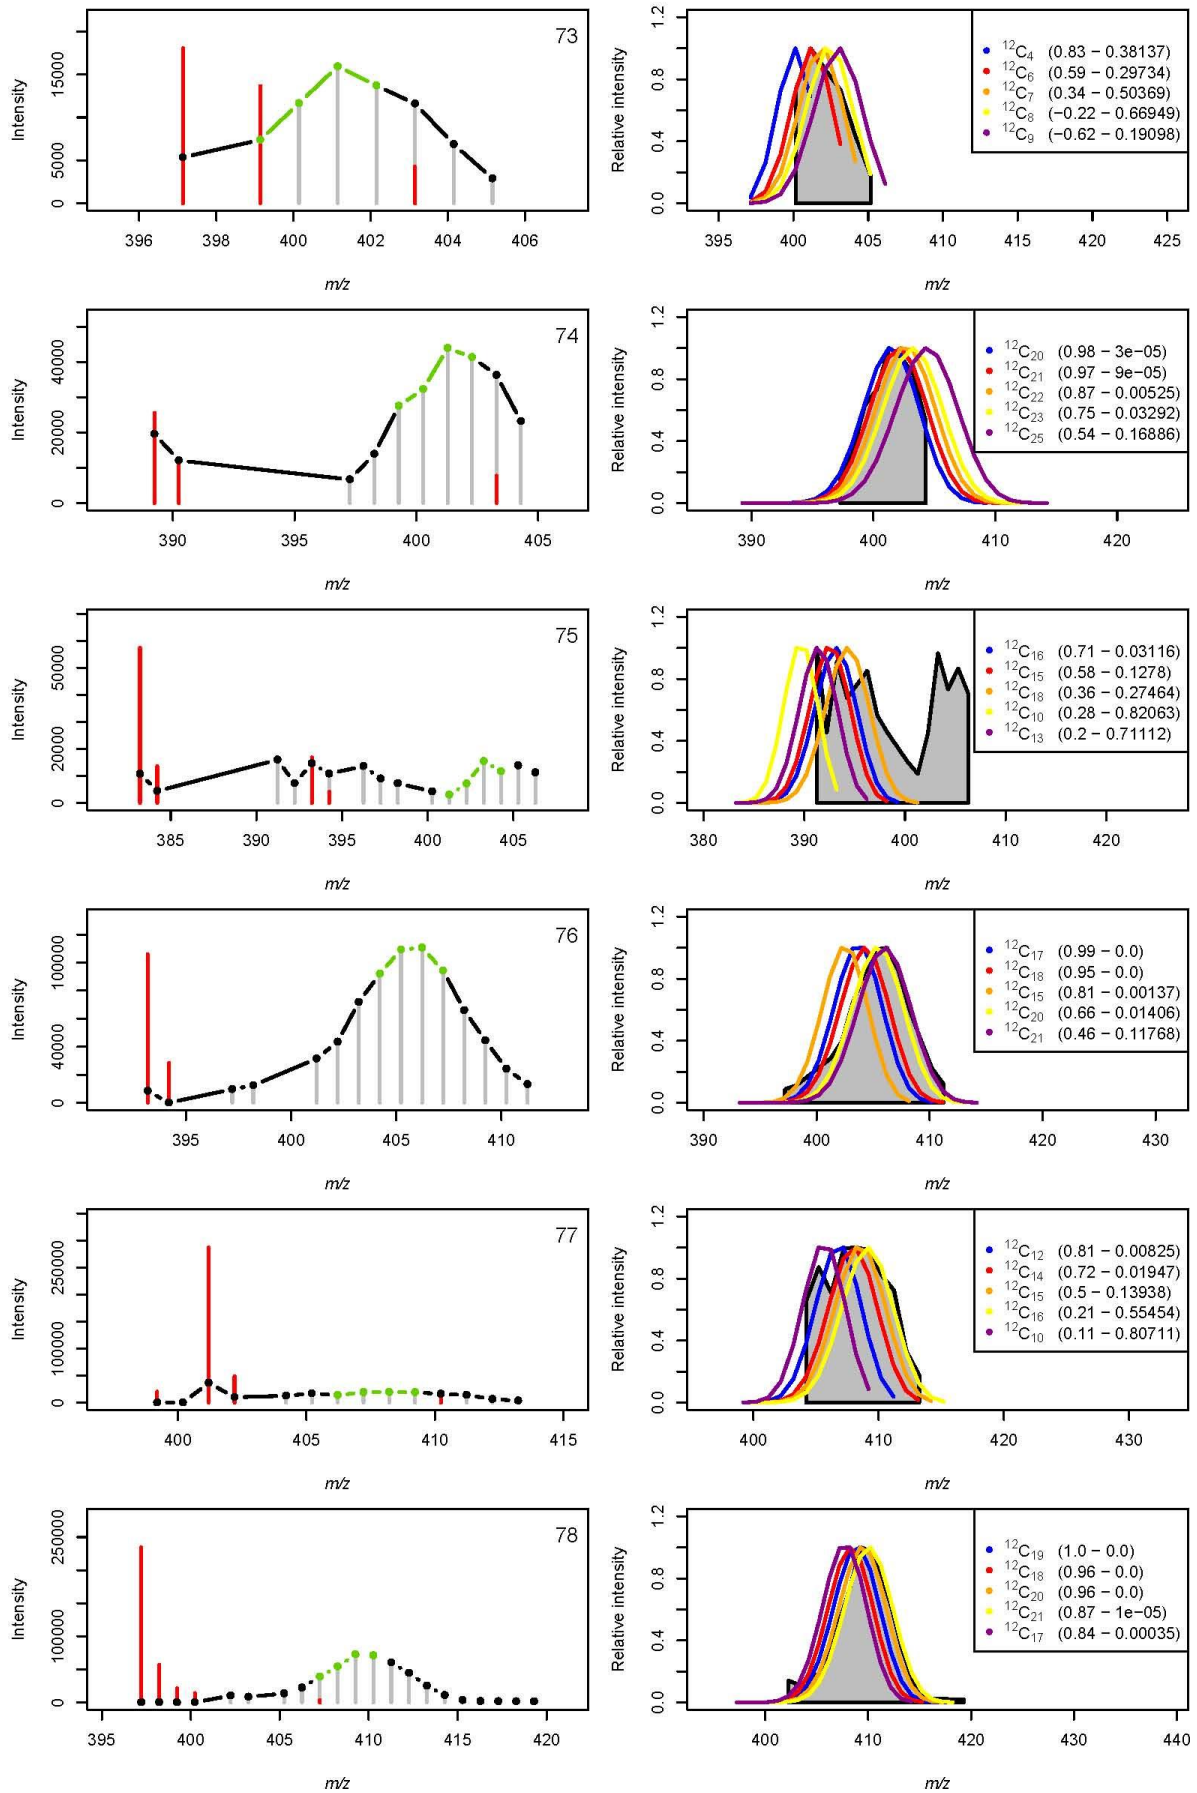

Figure S5. Cont.

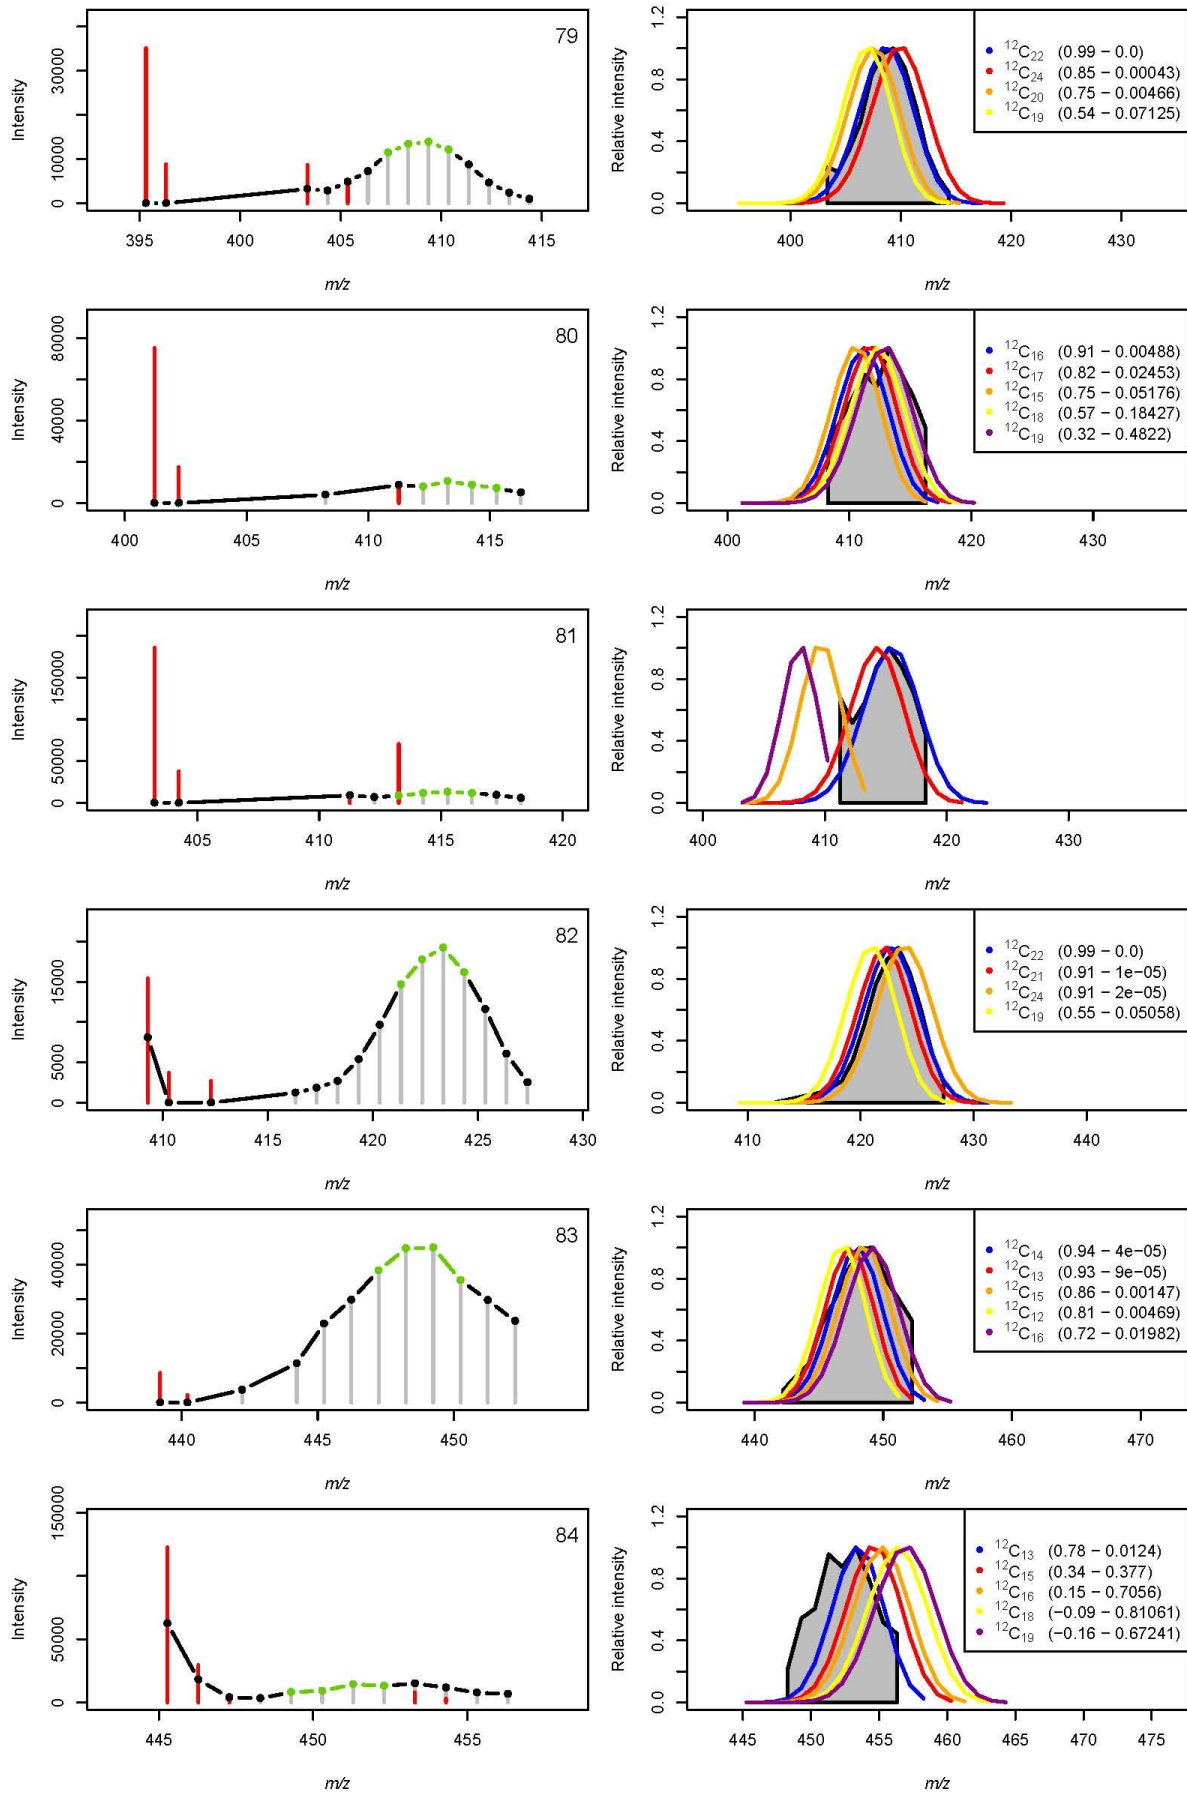

Figure S5. Cont.

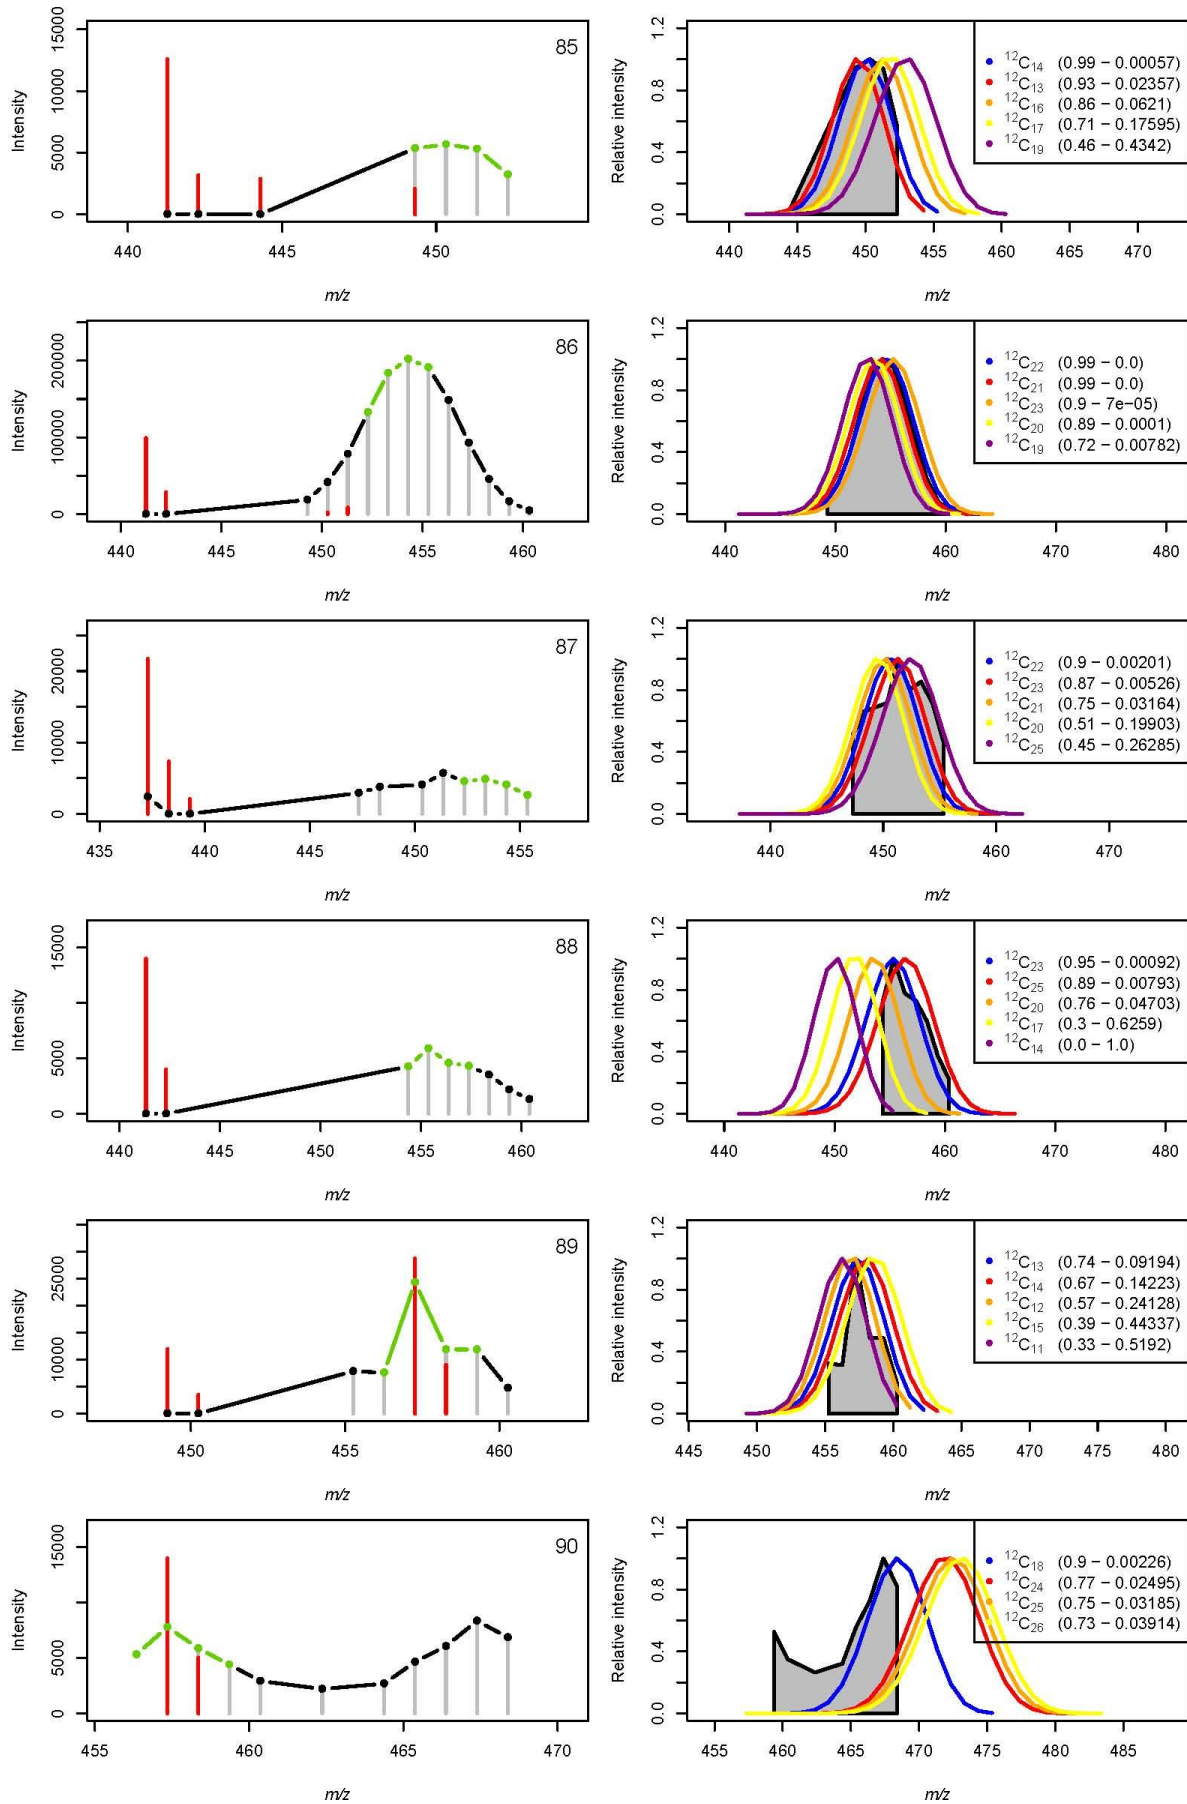

Figure S5. Cont.

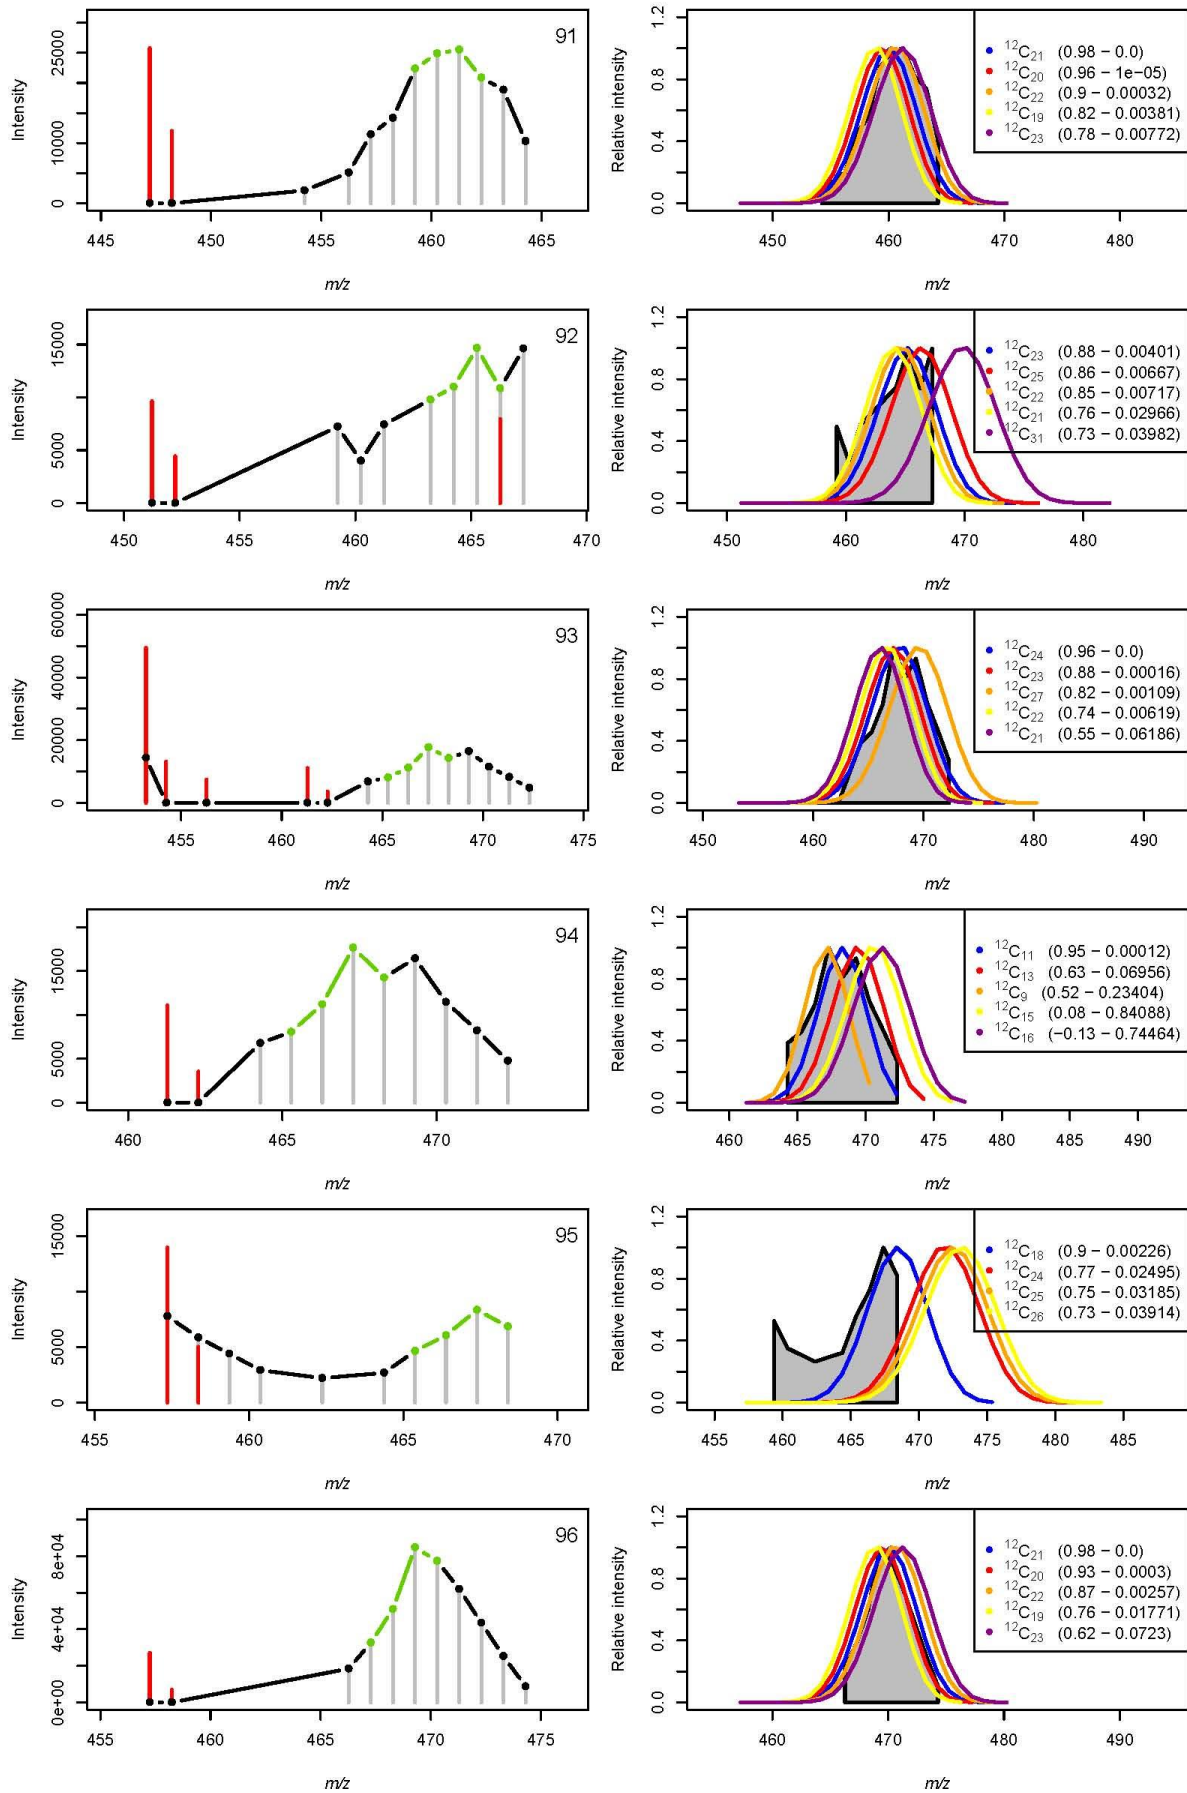



Figure S5. Cont.

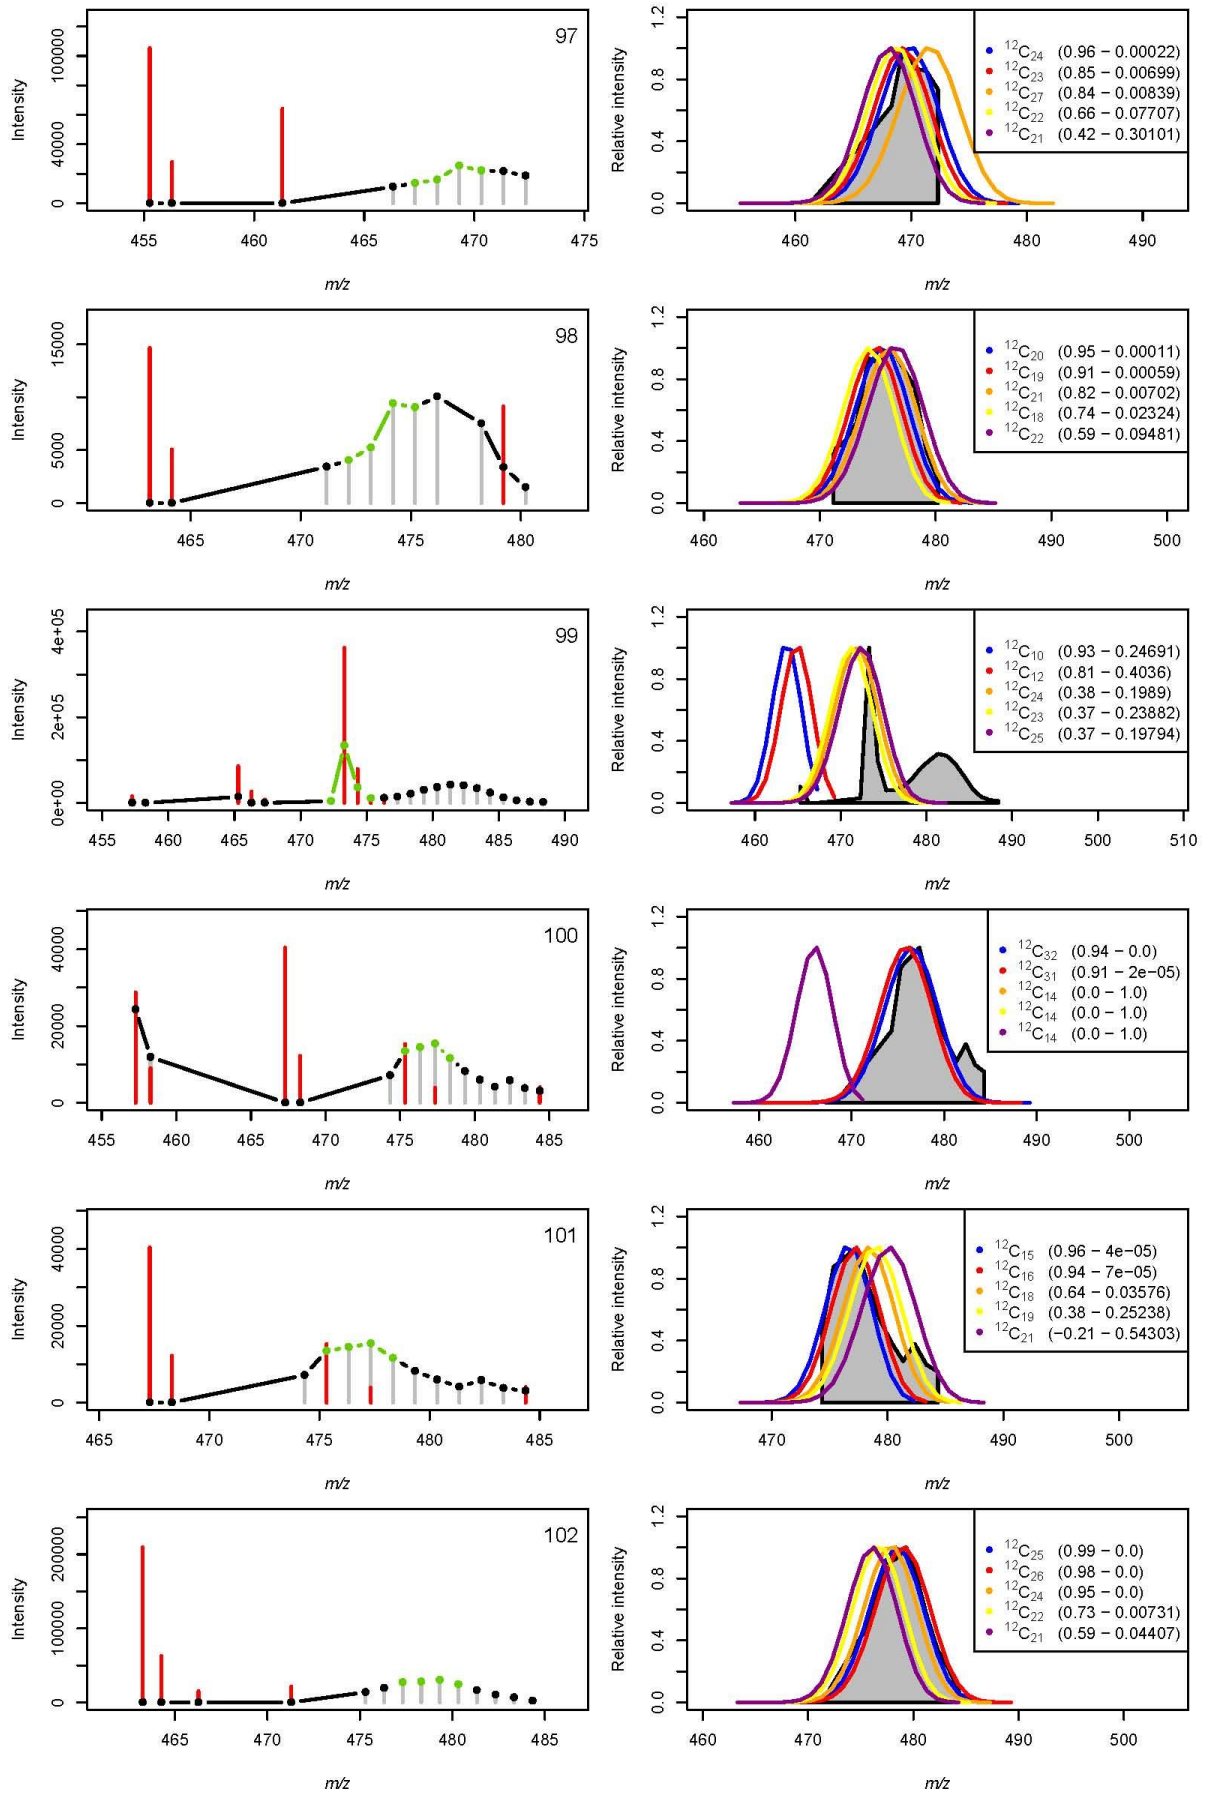

Figure S5. Cont.

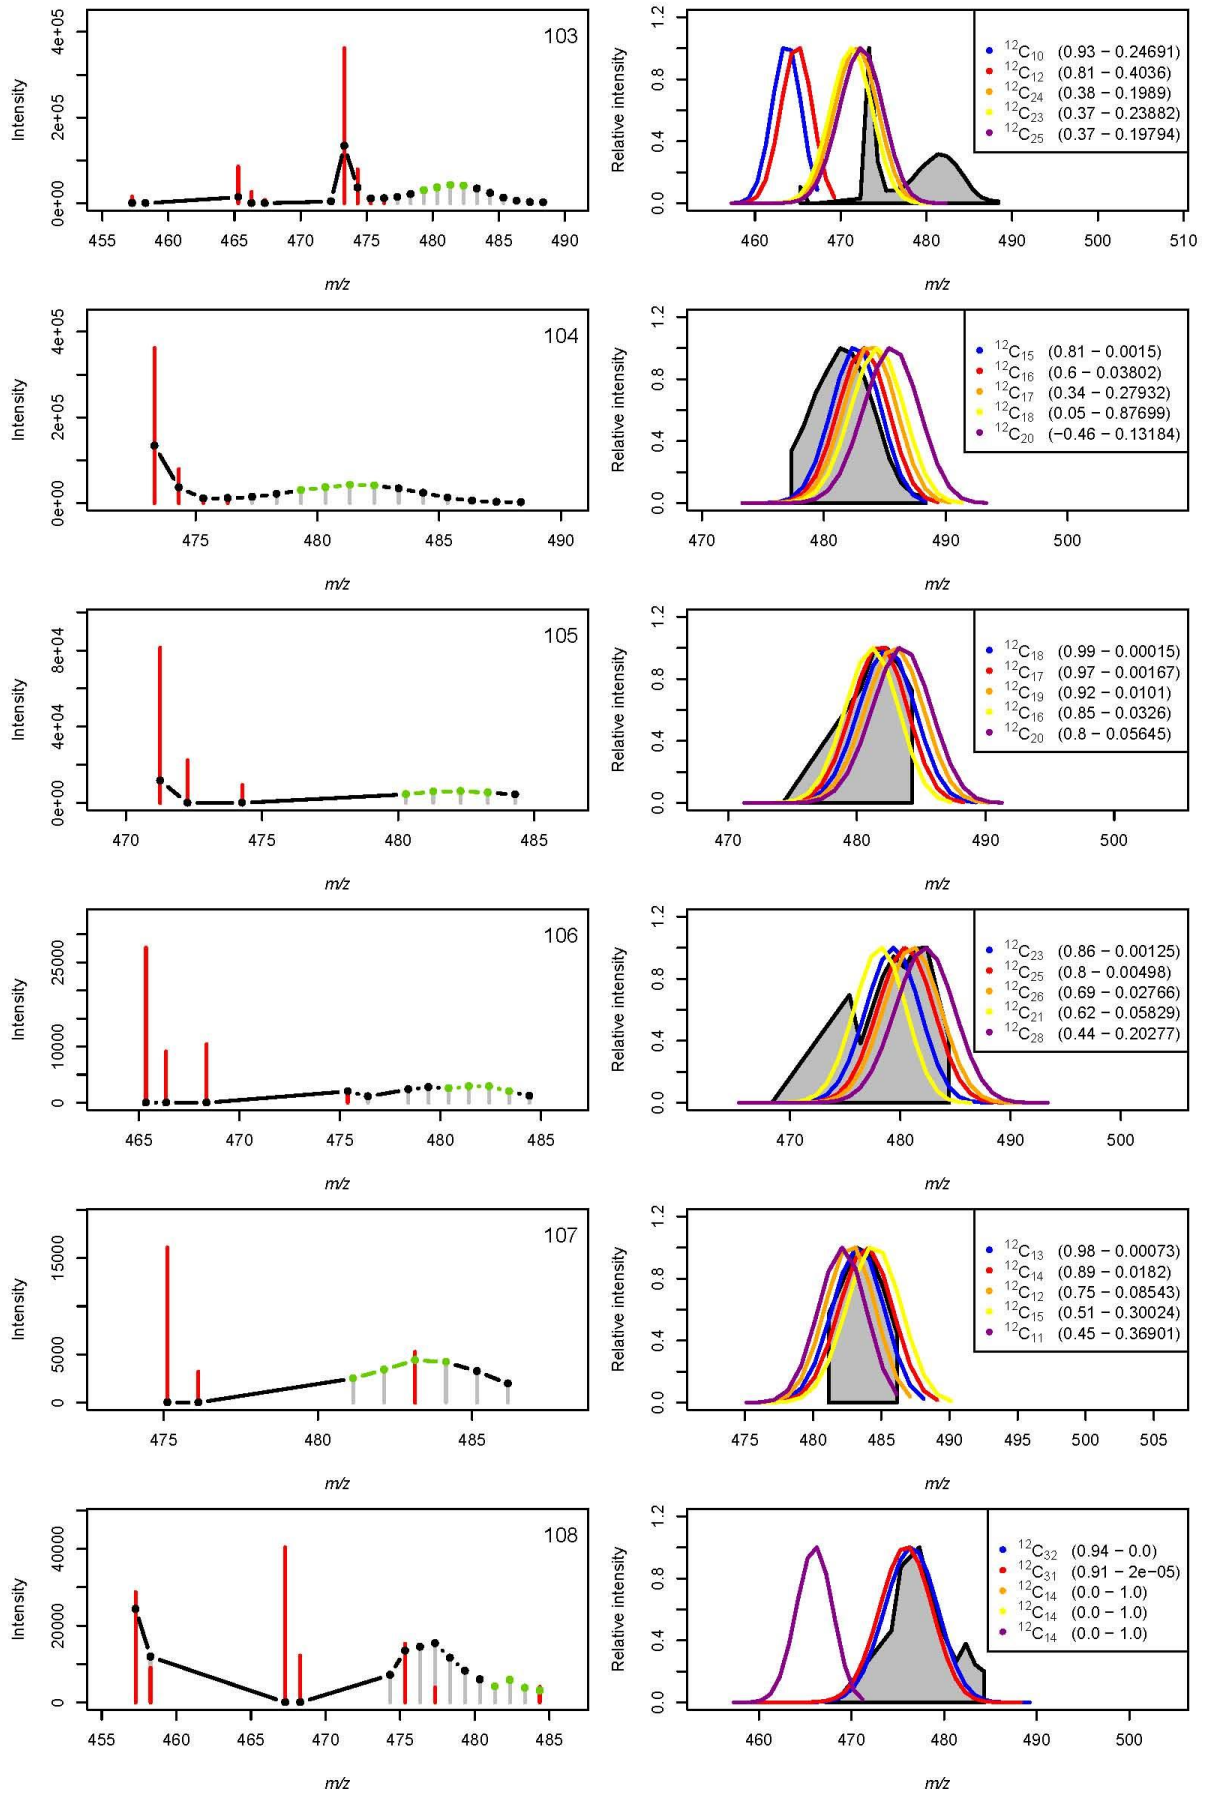

Figure S5. Cont.

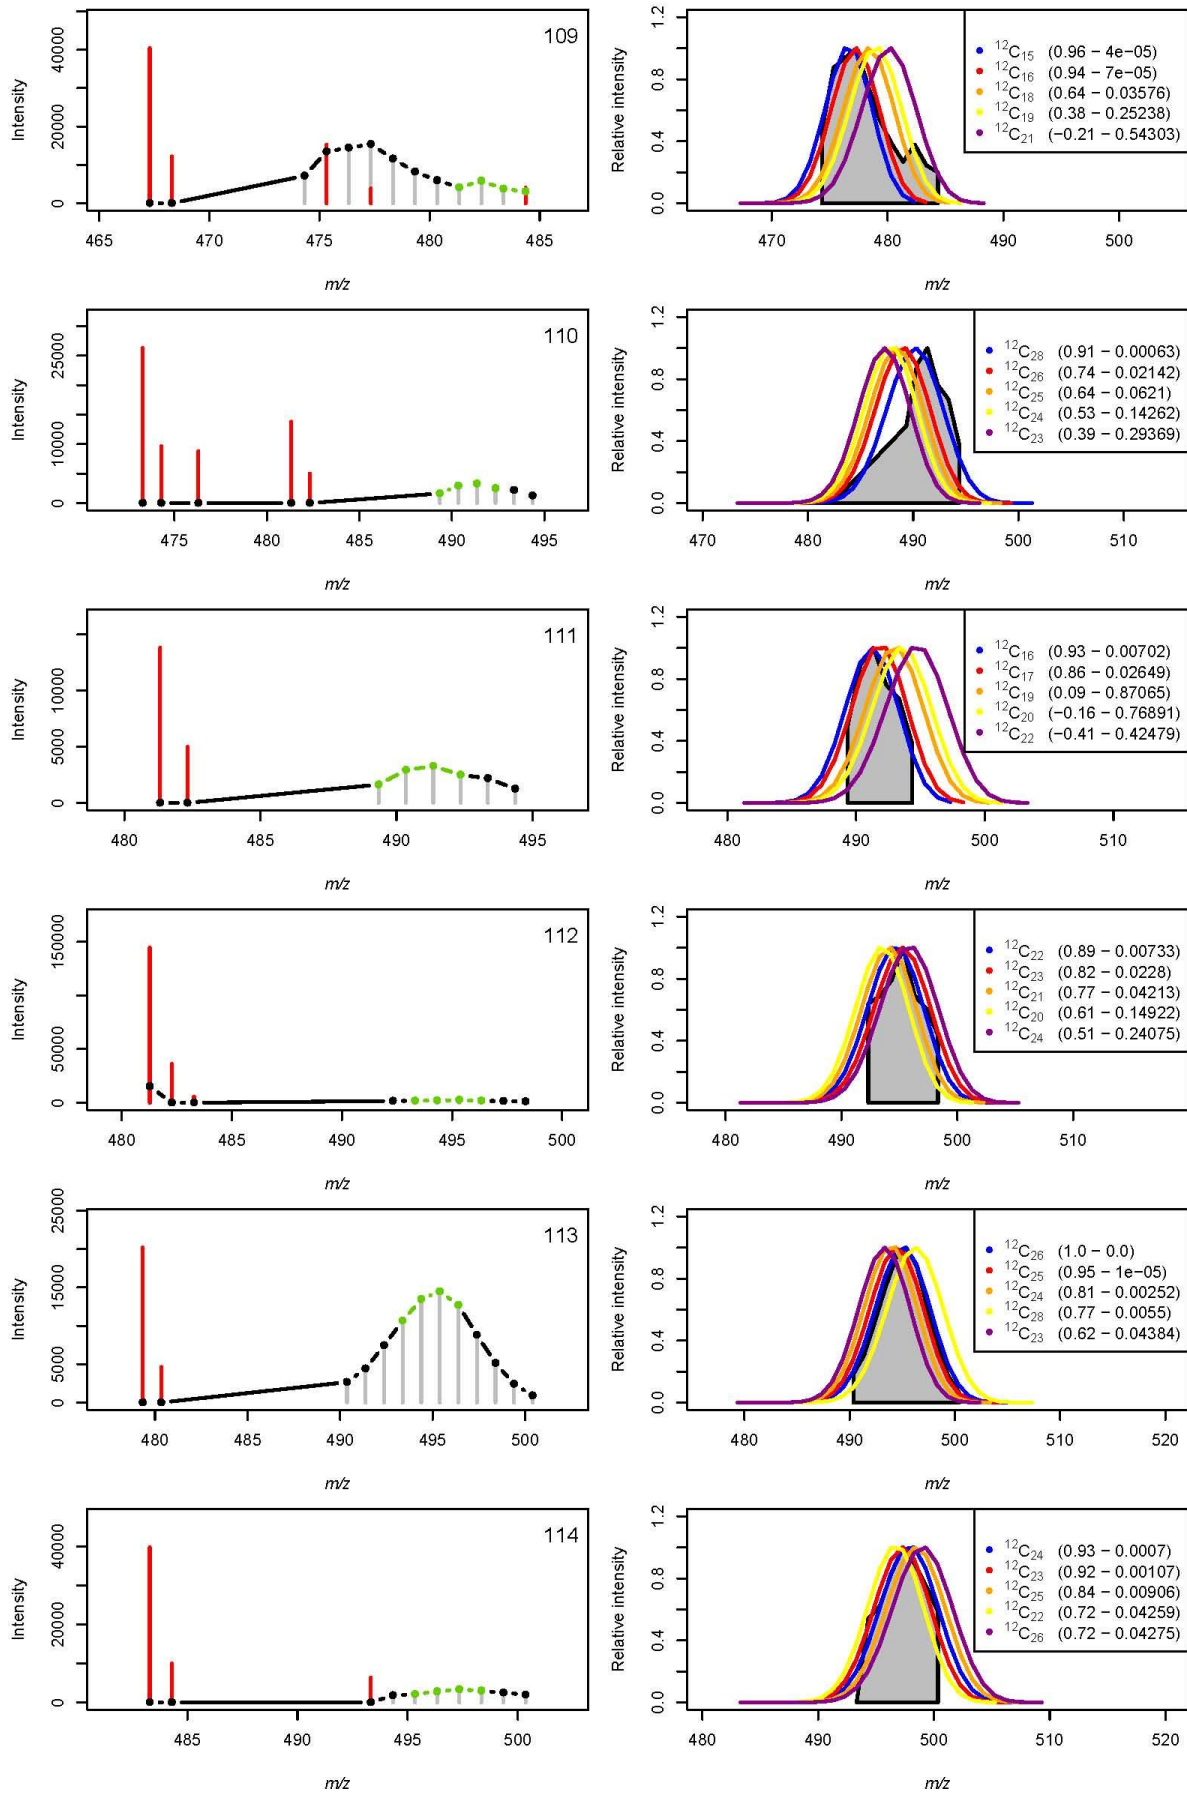



Figure S5. Cont.

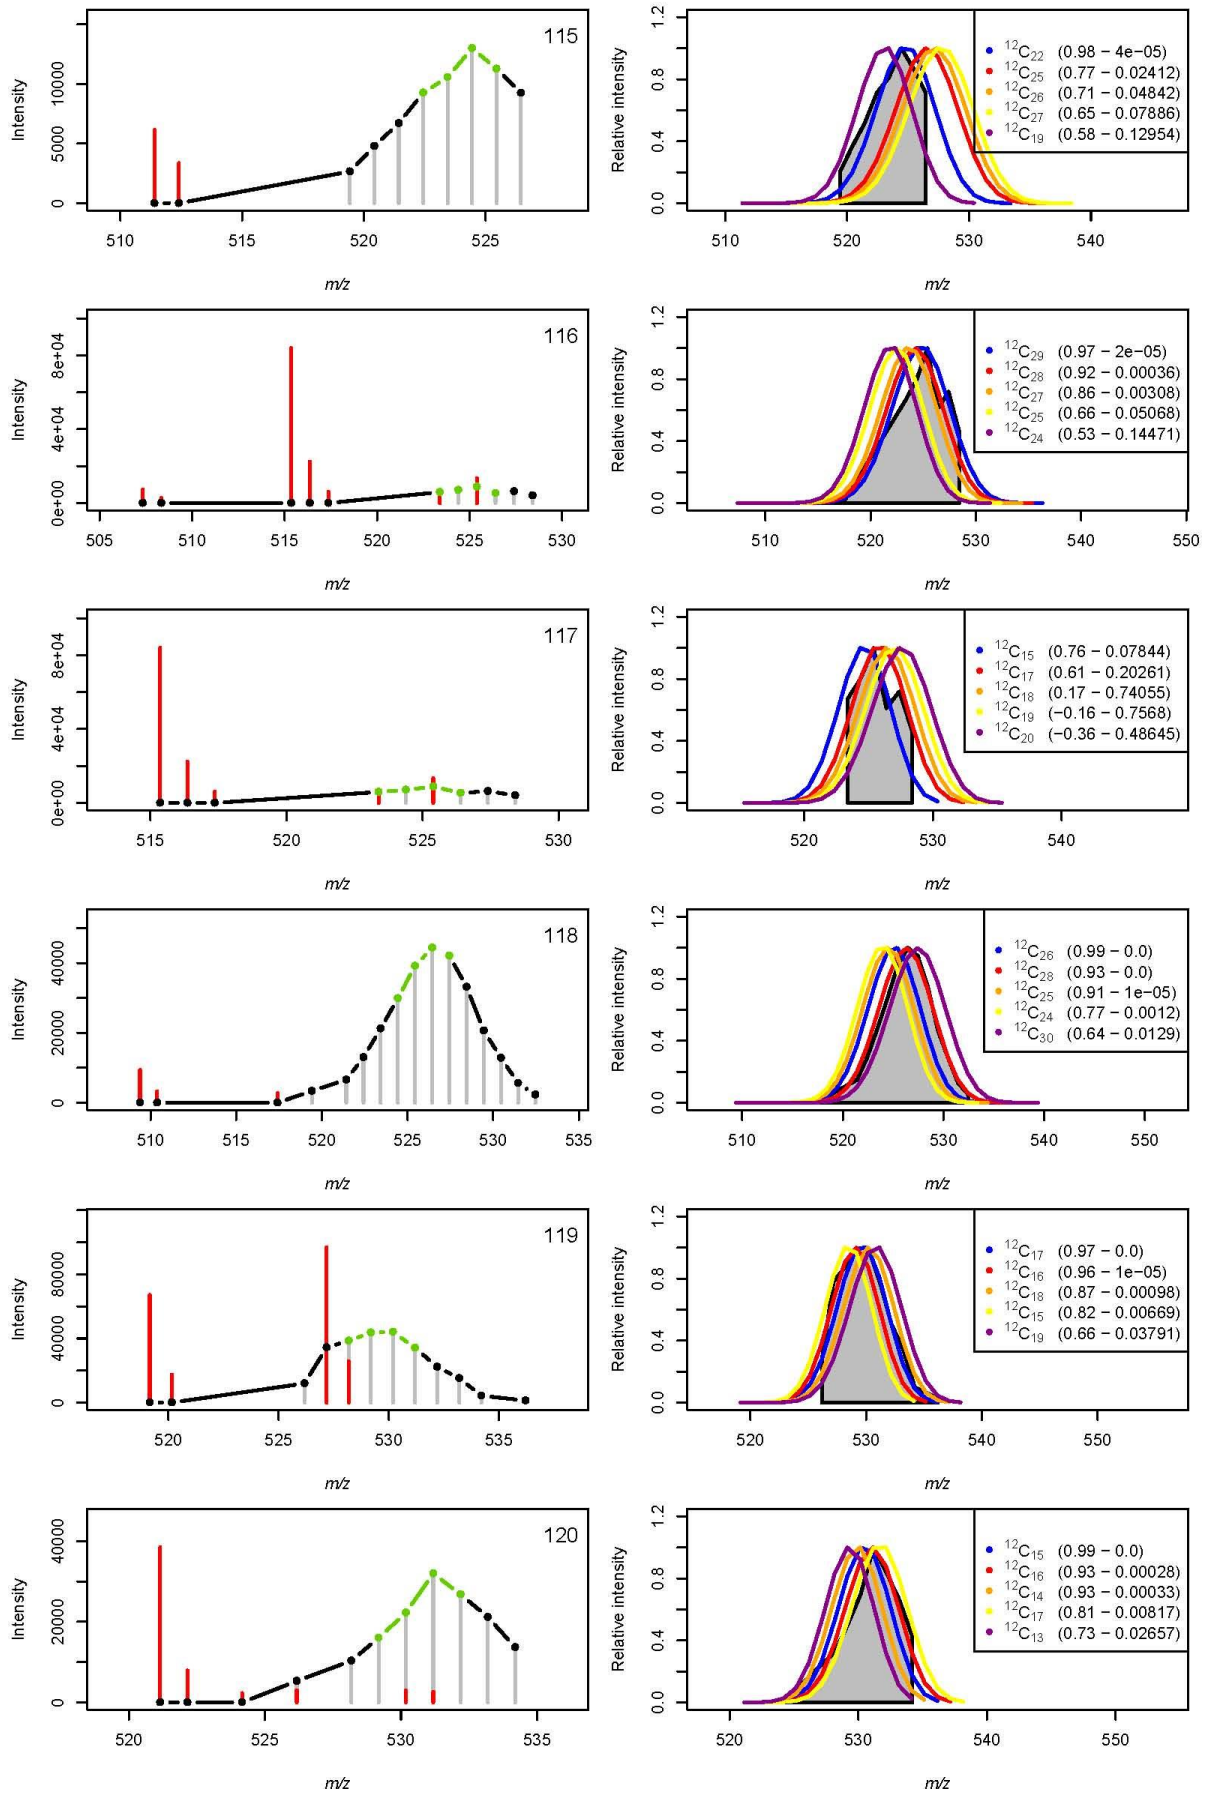

Figure S5. Cont.

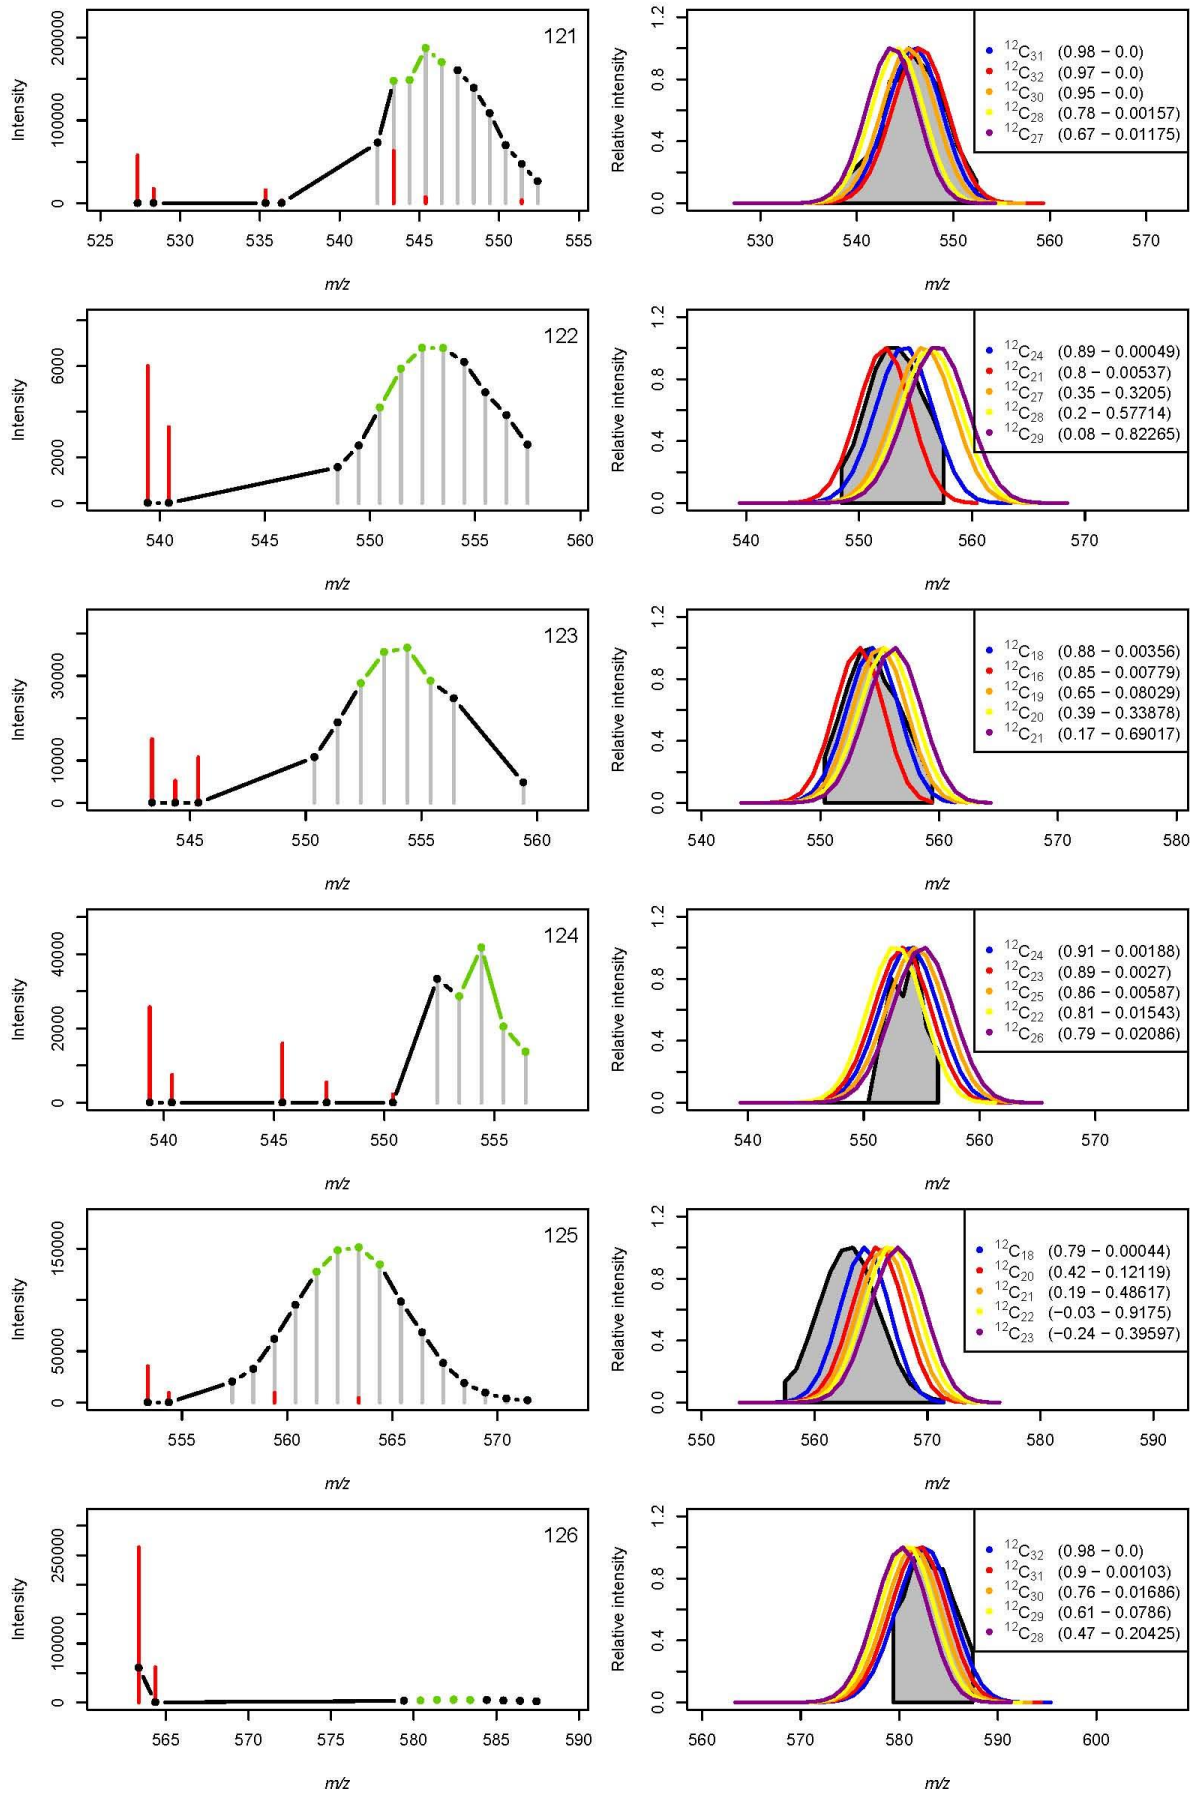

Supplement: marinedrugs-11-04158-s001.pdf [file marinedrugs-11-04158-s001.pdf]
